# Supplementary material for: An Evolutionary Trace method defines functionally important bases and sites common to RNA families
Source: PLoS Comput Biol. 2020 Mar 24;16(3):e1007583. doi: 10.1371/journal.pcbi.1007583 (PMC7092961; doi:10.1371/journal.pcbi.1007583)
Supplement: S2 Table — The table is an extension of S1C Table, and it enumerates nucleotides making up functional sites in the 16S and 23S rRNA. (XLSX) [file pcbi.1007583.s010.xlsx]

## Sheet: S2A. 16S functional sites
Supplementary Table S2A. Functional nucleotides in 16S rRNA
resi	nt	label	description
530	-	dc	canonical nucleotides of the 16S decoding center [1]
1491	-	dc	canonical nucleotides of the 16S decoding center [1]
1493	-	dc	canonical nucleotides of the 16S decoding center [1]
531	-	dc	16S nucleotides within 4A of canonical decoding triad
529	-	dc	16S nucleotides within 4A of canonical decoding triad
519	-	dc	16S nucleotides within 4A of canonical decoding triad
518	-	dc	16S nucleotides within 4A of canonical decoding triad
517	-	dc	16S nucleotides within 4A of canonical decoding triad
1492	-	dc	16S nucleotides within 4A of canonical decoding triad
1494	-	dc	16S nucleotides within 4A of canonical decoding triad
516	-	tf	16S nucleotides within 4A of IF1 in PDB 1HR0
517	-	tf	16S nucleotides within 4A of IF1 in PDB 1HR0
518	-	tf	16S nucleotides within 4A of IF1 in PDB 1HR0
519	-	tf	16S nucleotides within 4A of IF1 in PDB 1HR0
520	-	tf	16S nucleotides within 4A of IF1 in PDB 1HR0
530	-	tf	16S nucleotides within 4A of IF1 in PDB 1HR0
531	-	tf	16S nucleotides within 4A of IF1 in PDB 1HR0
1409	-	tf	16S nucleotides within 4A of IF1 in PDB 1HR0
1411	-	tf	16S nucleotides within 4A of IF1 in PDB 1HR0
1491	-	tf	16S nucleotides within 4A of IF1 in PDB 1HR0
1492	-	tf	16S nucleotides within 4A of IF1 in PDB 1HR0
1493	-	tf	16S nucleotides within 4A of IF1 in PDB 1HR0
1494	-	tf	16S nucleotides within 4A of IF1 in PDB 1HR0
55	-	tf	16S nucleotide within 4A of EF-Tu in PDB 4V5G
56	-	tf	16S nucleotide within 4A of EF-Tu in PDB 4V5G
357	-	tf	16S nucleotide within 4A of EF-Tu in PDB 4V5G
358	-	tf	16S nucleotide within 4A of EF-Tu in PDB 4V5G
359	-	tf	16S nucleotide within 4A of EF-Tu in PDB 4V5G
367	-	tf	16S nucleotide within 4A of EF-Tu in PDB 4V5G
368	-	tf	16S nucleotide within 4A of EF-Tu in PDB 4V5G
55	-	tf	16S nucleotide within 4A of EF-G in PDB 2WRI
358	-	tf	16S nucleotide within 4A of EF-G in PDB 2WRI
359	-	tf	16S nucleotide within 4A of EF-G in PDB 2WRI
361	-	tf	16S nucleotide within 4A of EF-G in PDB 2WRI
367	-	tf	16S nucleotide within 4A of EF-G in PDB 2WRI
368	-	tf	16S nucleotide within 4A of EF-G in PDB 2WRI
395	-	tf	16S nucleotide within 4A of EF-G in PDB 2WRI
396	-	tf	16S nucleotide within 4A of EF-G in PDB 2WRI
955	-	tf	16S nucleotide within 4A of EF-G in PDB 2WRI
957	-	tf	16S nucleotide within 4A of EF-G in PDB 2WRI
965	-	tf	16S nucleotide within 4A of EF-G in PDB 2WRI
1492	-	tf	16S nucleotide within 4A of EF-G in PDB 2WRI
1493	-	tf	16S nucleotide within 4A of EF-G in PDB 2WRI
1494	-	tf	16S nucleotide within 4A of EF-G in PDB 2WRI
1495	-	tf	16S nucleotide within 4A of EF-G in PDB 2WRI
1496	-	tf	16S nucleotide within 4A of EF-G in PDB 2WRI
518	-	tf	16S nucleotide within 4A of RF1 in PDB 3MRZ/3MS0
519	-	tf	16S nucleotide within 4A of RF1 in PDB 3MRZ/3MS0
530	-	tf	16S nucleotide within 4A of RF1 in PDB 3MRZ/3MS0
531	-	tf	16S nucleotide within 4A of RF1 in PDB 3MRZ/3MS0
955	-	tf	16S nucleotide within 4A of RF1 in PDB 3MRZ/3MS0
956	-	tf	16S nucleotide within 4A of RF1 in PDB 3MRZ/3MS0
991	-	tf	16S nucleotide within 4A of RF1 in PDB 3MRZ/3MS0
1052	-	tf	16S nucleotide within 4A of RF1 in PDB 3MRZ/3MS0
1054	-	tf	16S nucleotide within 4A of RF1 in PDB 3MRZ/3MS0
1196	-	tf	16S nucleotide within 4A of RF1 in PDB 3MRZ/3MS0
1212	-	tf	16S nucleotide within 4A of RF1 in PDB 3MRZ/3MS0
1397	-	tf	16S nucleotide within 4A of RF1 in PDB 3MRZ/3MS0
1400	-	tf	16S nucleotide within 4A of RF1 in PDB 3MRZ/3MS0
1491	-	tf	16S nucleotide within 4A of RF1 in PDB 3MRZ/3MS0
1492	-	tf	16S nucleotide within 4A of RF1 in PDB 3MRZ/3MS0
1493	-	tf	16S nucleotide within 4A of RF1 in PDB 3MRZ/3MS0
55	-	tf	16S nucleotide within 4A of RF3 in PDB 3ZVO/3ZVP
56	-	tf	16S nucleotide within 4A of RF3 in PDB 3ZVO/3ZVP
357	-	tf	16S nucleotide within 4A of RF3 in PDB 3ZVO/3ZVP
358	-	tf	16S nucleotide within 4A of RF3 in PDB 3ZVO/3ZVP
359	-	tf	16S nucleotide within 4A of RF3 in PDB 3ZVO/3ZVP
360	-	tf	16S nucleotide within 4A of RF3 in PDB 3ZVO/3ZVP
361	-	tf	16S nucleotide within 4A of RF3 in PDB 3ZVO/3ZVP
368	-	tf	16S nucleotide within 4A of RF3 in PDB 3ZVO/3ZVP
506	-	let	16S position known to present deleterious mutations [2]
524	-	let	16S position known to present deleterious mutations [2]
530	-	let	16S position known to present deleterious mutations [2]
912	-	let	16S position known to present deleterious mutations [2]
967	-	let	16S position known to present deleterious mutations [2]
981	-	let	16S position known to present deleterious mutations [2]
1054	-	let	16S position known to present deleterious mutations [2]
1199	-	let	16S position known to present deleterious mutations [2]
1202	-	let	16S position known to present deleterious mutations [2]
1207	-	let	16S position known to present deleterious mutations [2]
1395	-	let	16S position known to present deleterious mutations [2]
1400	-	let	16S position known to present deleterious mutations [2]
1406	-	let	16S position known to present deleterious mutations [2]
1407	-	let	16S position known to present deleterious mutations [2]
1505	-	let	16S position known to present deleterious mutations [2]
1538	-	let	16S position known to present deleterious mutations [2]
189	-	ben	16S position known to present benign mutations [2]
190	-	ben	16S position known to present benign mutations [2]
352	-	ben	16S position known to present benign mutations [2]
353	-	ben	16S position known to present benign mutations [2]
527	-	ben	16S position known to present benign mutations [2]
531	-	ben	16S position known to present benign mutations [2]
534	-	ben	16S position known to present benign mutations [2]
595	-	ben	16S position known to present benign mutations [2]
597	-	ben	16S position known to present benign mutations [2]
599	-	ben	16S position known to present benign mutations [2]
618	-	ben	16S position known to present benign mutations [2]
624	-	ben	16S position known to present benign mutations [2]
631	-	ben	16S position known to present benign mutations [2]
634	-	ben	16S position known to present benign mutations [2]
639	-	ben	16S position known to present benign mutations [2]
641	-	ben	16S position known to present benign mutations [2]
645	-	ben	16S position known to present benign mutations [2]
651	-	ben	16S position known to present benign mutations [2]
749	-	ben	16S position known to present benign mutations [2]
912	-	ben	16S position known to present benign mutations [2]
966	-	ben	16S position known to present benign mutations [2]
967	-	ben	16S position known to present benign mutations [2]
1054	-	ben	16S position known to present benign mutations [2]
1192	-	ben	16S position known to present benign mutations [2]
1199	-	ben	16S position known to present benign mutations [2]
1200	-	ben	16S position known to present benign mutations [2]
1202	-	ben	16S position known to present benign mutations [2]
1203	-	ben	16S position known to present benign mutations [2]
1341	-	ben	16S position known to present benign mutations [2]
1351	-	ben	16S position known to present benign mutations [2]
1357	-	ben	16S position known to present benign mutations [2]
1388	-	ben	16S position known to present benign mutations [2]
1389	-	ben	16S position known to present benign mutations [2]
1397	-	ben	16S position known to present benign mutations [2]
1400	-	ben	16S position known to present benign mutations [2]
1406	-	ben	16S position known to present benign mutations [2]
1492	-	ben	16S position known to present benign mutations [2]
1493	-	ben	16S position known to present benign mutations [2]
1495	-	ben	16S position known to present benign mutations [2]
1512	-	ben	16S position known to present benign mutations [2]
1518	-	ben	16S position known to present benign mutations [2]
1519	-	ben	16S position known to present benign mutations [2]
1523	-	ben	16S position known to present benign mutations [2]
1524	-	ben	16S position known to present benign mutations [2]
516	-	mod	modified nucleotide in 16S [3]
527	-	mod	modified nucleotide in 16S [3]
966	-	mod	modified nucleotide in 16S [3]
967	-	mod	modified nucleotide in 16S [3]
1207	-	mod	modified nucleotide in 16S [3]
1402	-	mod	modified nucleotide in 16S [3]
1407	-	mod	modified nucleotide in 16S [3]
1498	-	mod	modified nucleotide in 16S [3]
1516	-	mod	modified nucleotide in 16S [3]
1518	-	mod	modified nucleotide in 16S [3]
1519	-	mod	modified nucleotide in 16S [3]
12	-	antibiotic	16S nucleotide within 4A of antibiotic listed in [4]
13	-	antibiotic	16S nucleotide within 4A of antibiotic listed in [4]
14	-	antibiotic	16S nucleotide within 4A of antibiotic listed in [4]
526	-	antibiotic	16S nucleotide within 4A of antibiotic listed in [4]
527	-	antibiotic	16S nucleotide within 4A of antibiotic listed in [4]
677	-	antibiotic	16S nucleotide within 4A of antibiotic listed in [4]
692	-	antibiotic	16S nucleotide within 4A of antibiotic listed in [4]
693	-	antibiotic	16S nucleotide within 4A of antibiotic listed in [4]
694	-	antibiotic	16S nucleotide within 4A of antibiotic listed in [4]
695	-	antibiotic	16S nucleotide within 4A of antibiotic listed in [4]
772	-	antibiotic	16S nucleotide within 4A of antibiotic listed in [4]
773	-	antibiotic	16S nucleotide within 4A of antibiotic listed in [4]
774	-	antibiotic	16S nucleotide within 4A of antibiotic listed in [4]
775	-	antibiotic	16S nucleotide within 4A of antibiotic listed in [4]
776	-	antibiotic	16S nucleotide within 4A of antibiotic listed in [4]
778	-	antibiotic	16S nucleotide within 4A of antibiotic listed in [4]
779	-	antibiotic	16S nucleotide within 4A of antibiotic listed in [4]
786	-	antibiotic	16S nucleotide within 4A of antibiotic listed in [4]
787	-	antibiotic	16S nucleotide within 4A of antibiotic listed in [4]
788	-	antibiotic	16S nucleotide within 4A of antibiotic listed in [4]
789	-	antibiotic	16S nucleotide within 4A of antibiotic listed in [4]
790	-	antibiotic	16S nucleotide within 4A of antibiotic listed in [4]
794	-	antibiotic	16S nucleotide within 4A of antibiotic listed in [4]
795	-	antibiotic	16S nucleotide within 4A of antibiotic listed in [4]
796	-	antibiotic	16S nucleotide within 4A of antibiotic listed in [4]
886	-	antibiotic	16S nucleotide within 4A of antibiotic listed in [4]
903	-	antibiotic	16S nucleotide within 4A of antibiotic listed in [4]
904	-	antibiotic	16S nucleotide within 4A of antibiotic listed in [4]
911	-	antibiotic	16S nucleotide within 4A of antibiotic listed in [4]
912	-	antibiotic	16S nucleotide within 4A of antibiotic listed in [4]
913	-	antibiotic	16S nucleotide within 4A of antibiotic listed in [4]
914	-	antibiotic	16S nucleotide within 4A of antibiotic listed in [4]
915	-	antibiotic	16S nucleotide within 4A of antibiotic listed in [4]
922	-	antibiotic	16S nucleotide within 4A of antibiotic listed in [4]
923	-	antibiotic	16S nucleotide within 4A of antibiotic listed in [4]
1063	-	antibiotic	16S nucleotide within 4A of antibiotic listed in [4]
1064	-	antibiotic	16S nucleotide within 4A of antibiotic listed in [4]
1066	-	antibiotic	16S nucleotide within 4A of antibiotic listed in [4]
1068	-	antibiotic	16S nucleotide within 4A of antibiotic listed in [4]
1069	-	antibiotic	16S nucleotide within 4A of antibiotic listed in [4]
1191	-	antibiotic	16S nucleotide within 4A of antibiotic listed in [4]
1192	-	antibiotic	16S nucleotide within 4A of antibiotic listed in [4]
1193	-	antibiotic	16S nucleotide within 4A of antibiotic listed in [4]
1194	-	antibiotic	16S nucleotide within 4A of antibiotic listed in [4]
1382	-	antibiotic	16S nucleotide within 4A of antibiotic listed in [4]
1386	-	antibiotic	16S nucleotide within 4A of antibiotic listed in [4]
1387	-	antibiotic	16S nucleotide within 4A of antibiotic listed in [4]
1388	-	antibiotic	16S nucleotide within 4A of antibiotic listed in [4]
1403	-	antibiotic	16S nucleotide within 4A of antibiotic listed in [4]
1404	-	antibiotic	16S nucleotide within 4A of antibiotic listed in [4]
1405	-	antibiotic	16S nucleotide within 4A of antibiotic listed in [4]
1406	-	antibiotic	16S nucleotide within 4A of antibiotic listed in [4]
1407	-	antibiotic	16S nucleotide within 4A of antibiotic listed in [4]
1408	-	antibiotic	16S nucleotide within 4A of antibiotic listed in [4]
1410	-	antibiotic	16S nucleotide within 4A of antibiotic listed in [4]
1473	-	antibiotic	16S nucleotide within 4A of antibiotic listed in [4]
1474	-	antibiotic	16S nucleotide within 4A of antibiotic listed in [4]
1475	-	antibiotic	16S nucleotide within 4A of antibiotic listed in [4]
1476	-	antibiotic	16S nucleotide within 4A of antibiotic listed in [4]
1477	-	antibiotic	16S nucleotide within 4A of antibiotic listed in [4]
1482	-	antibiotic	16S nucleotide within 4A of antibiotic listed in [4]
1483	-	antibiotic	16S nucleotide within 4A of antibiotic listed in [4]
1484	-	antibiotic	16S nucleotide within 4A of antibiotic listed in [4]
1488	-	antibiotic	16S nucleotide within 4A of antibiotic listed in [4]
1489	-	antibiotic	16S nucleotide within 4A of antibiotic listed in [4]
1490	-	antibiotic	16S nucleotide within 4A of antibiotic listed in [4]
1491	-	antibiotic	16S nucleotide within 4A of antibiotic listed in [4]
1492	-	antibiotic	16S nucleotide within 4A of antibiotic listed in [4]
1493	-	antibiotic	16S nucleotide within 4A of antibiotic listed in [4]
1494	-	antibiotic	16S nucleotide within 4A of antibiotic listed in [4]
1495	-	antibiotic	16S nucleotide within 4A of antibiotic listed in [4]
1496	-	antibiotic	16S nucleotide within 4A of antibiotic listed in [4]
1497	-	antibiotic	16S nucleotide within 4A of antibiotic listed in [4]
1498	-	antibiotic	16S nucleotide within 4A of antibiotic listed in [4]
1406	U	bridge	16S nucleotide in bridge B2a/d [5]
1495	U	bridge	16S nucleotide in bridge B2a/d [5]
1407	C	bridge	16S nucleotide in bridge B2a/d [5]
1494	G	bridge	16S nucleotide in bridge B2a/d [5]
1408	A	bridge	16S nucleotide in bridge B2a/d [5]
1410	A	bridge	16S nucleotide in bridge B2a/d [5]
1409	C	bridge	16S nucleotide in bridge B2a/d [5]
793	U	bridge	16S nucleotide in bridge B2a/d [5]
1517	G	bridge	16S nucleotide in bridge B2a/d [5]
783	C	bridge	16S nucleotide in bridge B2b [5]
899	C	bridge	16S nucleotide in bridge B2c [5]
770	C	bridge	16S nucleotide in bridge B2c [5]
771	G	bridge	16S nucleotide in bridge B2c [5]
900	A	bridge	16S nucleotide in bridge B2c [5]
901	A	bridge	16S nucleotide in bridge B2c [5]
1483	A	bridge	16S nucleotide in bridge B3 [5]
1484	C	bridge	16S nucleotide in bridge B3 [5]
1418	A	bridge	16S nucleotide in bridge B3 [5]
1419	G	bridge	16S nucleotide in bridge B3 [5]
1421	G	bridge	16S nucleotide in bridge B3 [5]
1423	G	bridge	16S nucleotide in bridge B3 [5]
1429	C	bridge	16S nucleotide in bridge B5 [5]
1430	C	bridge	16S nucleotide in bridge B5 [5]
1475	G	bridge	16S nucleotide in bridge B5 [5]
1432	G	bridge	16S nucleotide in bridge B6 [5]
1464	G	bridge	16S nucleotide in bridge B6 [5]
1465	C	bridge	16S nucleotide in bridge B6 [5]
1463	C	bridge	16S nucleotide in bridge B6 [5]
1442	G	bridge	16S nucleotide in bridge B6 [5]
1444	A	bridge	16S nucleotide in bridge B6 [5]
1443	G	bridge	16S nucleotide in bridge B6 [5]
1443	G	bridge	16S nucleotide in bridge B6R [5]
1464	G	bridge	16S nucleotide in bridge B6R [5]
1465	C	bridge	16S nucleotide in bridge B6R [5]
702	A	bridge	16S nucleotide in bridge B7 [5]
702	A	bridge	16S nucleotide in bridge B7R [5]
712	A	bridge	16S nucleotide in bridge B7b [5]
774	G	bridge	16S nucleotide in bridge B7b [5]
680	C	bridge	16S nucleotide in bridge B7bR [5]
681	C	bridge	16S nucleotide in bridge B7bR [5]
711	G	bridge	16S nucleotide in bridge B7bR [5]
712	A	bridge	16S nucleotide in bridge B7bR [5]
773	G	bridge	16S nucleotide in bridge B7bR [5]
774	G	bridge	16S nucleotide in bridge B7bR [5]
775	G	bridge	16S nucleotide in bridge B7bR [5]
338	A	bridge	16S nucleotide in bridge B8 [5]
339	C	bridge	16S nucleotide in bridge B8 [5]
340	U	bridge	16S nucleotide in bridge B8 [5]
345	C	bridge	16S nucleotide in bridge B8 [5]
346	G	bridge	16S nucleotide in bridge B8 [5]
337	C	bridge	16S nucleotide in bridge B8R [5]
338	A	bridge	16S nucleotide in bridge B8R [5]
339	C	bridge	16S nucleotide in bridge B8R [5]
345	C	bridge	16S nucleotide in bridge B8R [5]
830	G	rprotein	16S nucleotide within 4A of 30S r-protein S2 (chain B in 2WDK)
1160	G	rprotein	16S nucleotide within 4A of 30S r-protein S2 (chain B in 2WDK)
828	A	rprotein	16S nucleotide within 4A of 30S r-protein S2 (chain B in 2WDK)
1103	C	rprotein	16S nucleotide within 4A of 30S r-protein S2 (chain B in 2WDK)
1075	C	rprotein	16S nucleotide within 4A of 30S r-protein S2 (chain B in 2WDK)
1074	G	rprotein	16S nucleotide within 4A of 30S r-protein S2 (chain B in 2WDK)
831	U	rprotein	16S nucleotide within 4A of 30S r-protein S2 (chain B in 2WDK)
1072	G	rprotein	16S nucleotide within 4A of 30S r-protein S2 (chain B in 2WDK)
1102	A	rprotein	16S nucleotide within 4A of 30S r-protein S2 (chain B in 2WDK)
1099	G	rprotein	16S nucleotide within 4A of 30S r-protein S2 (chain B in 2WDK)
841	U	rprotein	16S nucleotide within 4A of 30S r-protein S2 (chain B in 2WDK)
1100	C	rprotein	16S nucleotide within 4A of 30S r-protein S2 (chain B in 2WDK)
1101	A	rprotein	16S nucleotide within 4A of 30S r-protein S2 (chain B in 2WDK)
829	G	rprotein	16S nucleotide within 4A of 30S r-protein S2 (chain B in 2WDK)
1073	U	rprotein	16S nucleotide within 4A of 30S r-protein S2 (chain B in 2WDK)
1159	U	rprotein	16S nucleotide within 4A of 30S r-protein S2 (chain B in 2WDK)
1158	C	rprotein	16S nucleotide within 4A of 30S r-protein S2 (chain B in 2WDK)
859	A	rprotein	16S nucleotide within 4A of 30S r-protein S2 (chain B in 2WDK)
1104	G	rprotein	16S nucleotide within 4A of 30S r-protein S2 (chain B in 2WDK)
1191	A	rprotein	16S nucleotide within 4A of 30S r-protein S3 (chain C in 2WDK)
1055	A	rprotein	16S nucleotide within 4A of 30S r-protein S3 (chain C in 2WDK)
1060	C	rprotein	16S nucleotide within 4A of 30S r-protein S3 (chain C in 2WDK)
1057	G	rprotein	16S nucleotide within 4A of 30S r-protein S3 (chain C in 2WDK)
1062	U	rprotein	16S nucleotide within 4A of 30S r-protein S3 (chain C in 2WDK)
1109	C	rprotein	16S nucleotide within 4A of 30S r-protein S3 (chain C in 2WDK)
1256	A	rprotein	16S nucleotide within 4A of 30S r-protein S3 (chain C in 2WDK)
1058	G	rprotein	16S nucleotide within 4A of 30S r-protein S3 (chain C in 2WDK)
1106	G	rprotein	16S nucleotide within 4A of 30S r-protein S3 (chain C in 2WDK)
1255	G	rprotein	16S nucleotide within 4A of 30S r-protein S3 (chain C in 2WDK)
1112	C	rprotein	16S nucleotide within 4A of 30S r-protein S3 (chain C in 2WDK)
1111	A	rprotein	16S nucleotide within 4A of 30S r-protein S3 (chain C in 2WDK)
1190	G	rprotein	16S nucleotide within 4A of 30S r-protein S3 (chain C in 2WDK)
1189	C	rprotein	16S nucleotide within 4A of 30S r-protein S3 (chain C in 2WDK)
421	U	rprotein	16S nucleotide within 4A of 30S r-protein S3 (chain C in 2WDK)
1059	C	rprotein	16S nucleotide within 4A of 30S r-protein S3 (chain C in 2WDK)
1207	G	rprotein	16S nucleotide within 4A of 30S r-protein S3 (chain C in 2WDK)
1107	C	rprotein	16S nucleotide within 4A of 30S r-protein S3 (chain C in 2WDK)
1056	U	rprotein	16S nucleotide within 4A of 30S r-protein S3 (chain C in 2WDK)
1061	G	rprotein	16S nucleotide within 4A of 30S r-protein S3 (chain C in 2WDK)
1279	A	rprotein	16S nucleotide within 4A of 30S r-protein S3 (chain C in 2WDK)
1204	A	rprotein	16S nucleotide within 4A of 30S r-protein S3 (chain C in 2WDK)
532	A	rprotein	16S nucleotide within 4A of 30S r-protein S3 (chain C in 2WDK)
1196	U	rprotein	16S nucleotide within 4A of 30S r-protein S3 (chain C in 2WDK)
1192	C	rprotein	16S nucleotide within 4A of 30S r-protein S3 (chain C in 2WDK)
1193	G	rprotein	16S nucleotide within 4A of 30S r-protein S3 (chain C in 2WDK)
1188	A	rprotein	16S nucleotide within 4A of 30S r-protein S3 (chain C in 2WDK)
1257	U	rprotein	16S nucleotide within 4A of 30S r-protein S3 (chain C in 2WDK)
1205	U	rprotein	16S nucleotide within 4A of 30S r-protein S3 (chain C in 2WDK)
1206	G	rprotein	16S nucleotide within 4A of 30S r-protein S3 (chain C in 2WDK)
1108	G	rprotein	16S nucleotide within 4A of 30S r-protein S3 (chain C in 2WDK)
620	C	rprotein	16S nucleotide within 4A of 30S r-protein S4 (chain D in 2WDK)
401	C	rprotein	16S nucleotide within 4A of 30S r-protein S4 (chain D in 2WDK)
406	G	rprotein	16S nucleotide within 4A of 30S r-protein S4 (chain D in 2WDK)
437	U	rprotein	16S nucleotide within 4A of 30S r-protein S4 (chain D in 2WDK)
28	G	rprotein	16S nucleotide within 4A of 30S r-protein S4 (chain D in 2WDK)
400	C	rprotein	16S nucleotide within 4A of 30S r-protein S4 (chain D in 2WDK)
511	C	rprotein	16S nucleotide within 4A of 30S r-protein S4 (chain D in 2WDK)
543	C	rprotein	16S nucleotide within 4A of 30S r-protein S4 (chain D in 2WDK)
8	A	rprotein	16S nucleotide within 4A of 30S r-protein S4 (chain D in 2WDK)
508	C	rprotein	16S nucleotide within 4A of 30S r-protein S4 (chain D in 2WDK)
439	A	rprotein	16S nucleotide within 4A of 30S r-protein S4 (chain D in 2WDK)
410	G	rprotein	16S nucleotide within 4A of 30S r-protein S4 (chain D in 2WDK)
27	G	rprotein	16S nucleotide within 4A of 30S r-protein S4 (chain D in 2WDK)
428	G	rprotein	16S nucleotide within 4A of 30S r-protein S4 (chain D in 2WDK)
408	A	rprotein	16S nucleotide within 4A of 30S r-protein S4 (chain D in 2WDK)
425	G	rprotein	16S nucleotide within 4A of 30S r-protein S4 (chain D in 2WDK)
492	G	rprotein	16S nucleotide within 4A of 30S r-protein S4 (chain D in 2WDK)
489	C	rprotein	16S nucleotide within 4A of 30S r-protein S4 (chain D in 2WDK)
541	G	rprotein	16S nucleotide within 4A of 30S r-protein S4 (chain D in 2WDK)
427	U	rprotein	16S nucleotide within 4A of 30S r-protein S4 (chain D in 2WDK)
619	U	rprotein	16S nucleotide within 4A of 30S r-protein S4 (chain D in 2WDK)
616	G	rprotein	16S nucleotide within 4A of 30S r-protein S4 (chain D in 2WDK)
405	U	rprotein	16S nucleotide within 4A of 30S r-protein S4 (chain D in 2WDK)
540	G	rprotein	16S nucleotide within 4A of 30S r-protein S4 (chain D in 2WDK)
438	G	rprotein	16S nucleotide within 4A of 30S r-protein S4 (chain D in 2WDK)
404	U	rprotein	16S nucleotide within 4A of 30S r-protein S4 (chain D in 2WDK)
409	G	rprotein	16S nucleotide within 4A of 30S r-protein S4 (chain D in 2WDK)
512	U	rprotein	16S nucleotide within 4A of 30S r-protein S4 (chain D in 2WDK)
430	A	rprotein	16S nucleotide within 4A of 30S r-protein S4 (chain D in 2WDK)
542	G	rprotein	16S nucleotide within 4A of 30S r-protein S4 (chain D in 2WDK)
403	C	rprotein	16S nucleotide within 4A of 30S r-protein S4 (chain D in 2WDK)
26	A	rprotein	16S nucleotide within 4A of 30S r-protein S4 (chain D in 2WDK)
509	A	rprotein	16S nucleotide within 4A of 30S r-protein S4 (chain D in 2WDK)
545	C	rprotein	16S nucleotide within 4A of 30S r-protein S4 (chain D in 2WDK)
429	U	rprotein	16S nucleotide within 4A of 30S r-protein S4 (chain D in 2WDK)
413	G	rprotein	16S nucleotide within 4A of 30S r-protein S4 (chain D in 2WDK)
407	G	rprotein	16S nucleotide within 4A of 30S r-protein S4 (chain D in 2WDK)
426	G	rprotein	16S nucleotide within 4A of 30S r-protein S4 (chain D in 2WDK)
547	A	rprotein	16S nucleotide within 4A of 30S r-protein S4 (chain D in 2WDK)
411	A	rprotein	16S nucleotide within 4A of 30S r-protein S4 (chain D in 2WDK)
5	U	rprotein	16S nucleotide within 4A of 30S r-protein S4 (chain D in 2WDK)
614	A	rprotein	16S nucleotide within 4A of 30S r-protein S4 (chain D in 2WDK)
490	G	rprotein	16S nucleotide within 4A of 30S r-protein S4 (chain D in 2WDK)
495	A	rprotein	16S nucleotide within 4A of 30S r-protein S4 (chain D in 2WDK)
419	C	rprotein	16S nucleotide within 4A of 30S r-protein S4 (chain D in 2WDK)
436	C	rprotein	16S nucleotide within 4A of 30S r-protein S4 (chain D in 2WDK)
544	G	rprotein	16S nucleotide within 4A of 30S r-protein S4 (chain D in 2WDK)
402	G	rprotein	16S nucleotide within 4A of 30S r-protein S4 (chain D in 2WDK)
412	A	rprotein	16S nucleotide within 4A of 30S r-protein S4 (chain D in 2WDK)
546	G	rprotein	16S nucleotide within 4A of 30S r-protein S4 (chain D in 2WDK)
923	A	rprotein	16S nucleotide within 4A of 30S r-protein S5 (chain E in 2WDK)
1074	G	rprotein	16S nucleotide within 4A of 30S r-protein S5 (chain E in 2WDK)
16	A	rprotein	16S nucleotide within 4A of 30S r-protein S5 (chain E in 2WDK)
15	G	rprotein	16S nucleotide within 4A of 30S r-protein S5 (chain E in 2WDK)
18	C	rprotein	16S nucleotide within 4A of 30S r-protein S5 (chain E in 2WDK)
1079	G	rprotein	16S nucleotide within 4A of 30S r-protein S5 (chain E in 2WDK)
1072	G	rprotein	16S nucleotide within 4A of 30S r-protein S5 (chain E in 2WDK)
1194	U	rprotein	16S nucleotide within 4A of 30S r-protein S5 (chain E in 2WDK)
17	U	rprotein	16S nucleotide within 4A of 30S r-protein S5 (chain E in 2WDK)
8	A	rprotein	16S nucleotide within 4A of 30S r-protein S5 (chain E in 2WDK)
921	U	rprotein	16S nucleotide within 4A of 30S r-protein S5 (chain E in 2WDK)
6	G	rprotein	16S nucleotide within 4A of 30S r-protein S5 (chain E in 2WDK)
1069	C	rprotein	16S nucleotide within 4A of 30S r-protein S5 (chain E in 2WDK)
864	A	rprotein	16S nucleotide within 4A of 30S r-protein S5 (chain E in 2WDK)
1080	A	rprotein	16S nucleotide within 4A of 30S r-protein S5 (chain E in 2WDK)
9	G	rprotein	16S nucleotide within 4A of 30S r-protein S5 (chain E in 2WDK)
560	U	rprotein	16S nucleotide within 4A of 30S r-protein S5 (chain E in 2WDK)
1397	C	rprotein	16S nucleotide within 4A of 30S r-protein S5 (chain E in 2WDK)
1070	U	rprotein	16S nucleotide within 4A of 30S r-protein S5 (chain E in 2WDK)
922	G	rprotein	16S nucleotide within 4A of 30S r-protein S5 (chain E in 2WDK)
1077	G	rprotein	16S nucleotide within 4A of 30S r-protein S5 (chain E in 2WDK)
1071	C	rprotein	16S nucleotide within 4A of 30S r-protein S5 (chain E in 2WDK)
1081	G	rprotein	16S nucleotide within 4A of 30S r-protein S5 (chain E in 2WDK)
558	G	rprotein	16S nucleotide within 4A of 30S r-protein S5 (chain E in 2WDK)
1078	U	rprotein	16S nucleotide within 4A of 30S r-protein S5 (chain E in 2WDK)
1398	A	rprotein	16S nucleotide within 4A of 30S r-protein S5 (chain E in 2WDK)
559	A	rprotein	16S nucleotide within 4A of 30S r-protein S5 (chain E in 2WDK)
20	U	rprotein	16S nucleotide within 4A of 30S r-protein S5 (chain E in 2WDK)
19	C	rprotein	16S nucleotide within 4A of 30S r-protein S5 (chain E in 2WDK)
1192	C	rprotein	16S nucleotide within 4A of 30S r-protein S5 (chain E in 2WDK)
5	U	rprotein	16S nucleotide within 4A of 30S r-protein S5 (chain E in 2WDK)
1396	A	rprotein	16S nucleotide within 4A of 30S r-protein S5 (chain E in 2WDK)
1073	U	rprotein	16S nucleotide within 4A of 30S r-protein S5 (chain E in 2WDK)
7	G	rprotein	16S nucleotide within 4A of 30S r-protein S5 (chain E in 2WDK)
10	A	rprotein	16S nucleotide within 4A of 30S r-protein S5 (chain E in 2WDK)
735	C	rprotein	16S nucleotide within 4A of 30S r-protein S6 (chain F in 2WDK)
710	G	rprotein	16S nucleotide within 4A of 30S r-protein S6 (chain F in 2WDK)
736	C	rprotein	16S nucleotide within 4A of 30S r-protein S6 (chain F in 2WDK)
670	G	rprotein	16S nucleotide within 4A of 30S r-protein S6 (chain F in 2WDK)
671	G	rprotein	16S nucleotide within 4A of 30S r-protein S6 (chain F in 2WDK)
673	G	rprotein	16S nucleotide within 4A of 30S r-protein S6 (chain F in 2WDK)
739	C	rprotein	16S nucleotide within 4A of 30S r-protein S6 (chain F in 2WDK)
674	G	rprotein	16S nucleotide within 4A of 30S r-protein S6 (chain F in 2WDK)
738	C	rprotein	16S nucleotide within 4A of 30S r-protein S6 (chain F in 2WDK)
672	U	rprotein	16S nucleotide within 4A of 30S r-protein S6 (chain F in 2WDK)
711	G	rprotein	16S nucleotide within 4A of 30S r-protein S6 (chain F in 2WDK)
737	A	rprotein	16S nucleotide within 4A of 30S r-protein S6 (chain F in 2WDK)
935	A	rprotein	16S nucleotide within 4A of 30S r-protein S7 (chain G in 2WDK)
1289	A	rprotein	16S nucleotide within 4A of 30S r-protein S7 (chain G in 2WDK)
1381	U	rprotein	16S nucleotide within 4A of 30S r-protein S7 (chain G in 2WDK)
1382	C	rprotein	16S nucleotide within 4A of 30S r-protein S7 (chain G in 2WDK)
1375	A	rprotein	16S nucleotide within 4A of 30S r-protein S7 (chain G in 2WDK)
1378	C	rprotein	16S nucleotide within 4A of 30S r-protein S7 (chain G in 2WDK)
1241	G	rprotein	16S nucleotide within 4A of 30S r-protein S7 (chain G in 2WDK)
1374	A	rprotein	16S nucleotide within 4A of 30S r-protein S7 (chain G in 2WDK)
1298	C	rprotein	16S nucleotide within 4A of 30S r-protein S7 (chain G in 2WDK)
933	G	rprotein	16S nucleotide within 4A of 30S r-protein S7 (chain G in 2WDK)
694	A	rprotein	16S nucleotide within 4A of 30S r-protein S7 (chain G in 2WDK)
1240	U	rprotein	16S nucleotide within 4A of 30S r-protein S7 (chain G in 2WDK)
1376	U	rprotein	16S nucleotide within 4A of 30S r-protein S7 (chain G in 2WDK)
939	G	rprotein	16S nucleotide within 4A of 30S r-protein S7 (chain G in 2WDK)
1297	C	rprotein	16S nucleotide within 4A of 30S r-protein S7 (chain G in 2WDK)
1372	U	rprotein	16S nucleotide within 4A of 30S r-protein S7 (chain G in 2WDK)
1377	A	rprotein	16S nucleotide within 4A of 30S r-protein S7 (chain G in 2WDK)
1292	U	rprotein	16S nucleotide within 4A of 30S r-protein S7 (chain G in 2WDK)
1092	A	rprotein	16S nucleotide within 4A of 30S r-protein S7 (chain G in 2WDK)
1350	A	rprotein	16S nucleotide within 4A of 30S r-protein S7 (chain G in 2WDK)
1346	A	rprotein	16S nucleotide within 4A of 30S r-protein S7 (chain G in 2WDK)
937	A	rprotein	16S nucleotide within 4A of 30S r-protein S7 (chain G in 2WDK)
932	C	rprotein	16S nucleotide within 4A of 30S r-protein S7 (chain G in 2WDK)
940	C	rprotein	16S nucleotide within 4A of 30S r-protein S7 (chain G in 2WDK)
1291	G	rprotein	16S nucleotide within 4A of 30S r-protein S7 (chain G in 2WDK)
1380	U	rprotein	16S nucleotide within 4A of 30S r-protein S7 (chain G in 2WDK)
693	G	rprotein	16S nucleotide within 4A of 30S r-protein S7 (chain G in 2WDK)
1351	U	rprotein	16S nucleotide within 4A of 30S r-protein S7 (chain G in 2WDK)
1379	G	rprotein	16S nucleotide within 4A of 30S r-protein S7 (chain G in 2WDK)
938	A	rprotein	16S nucleotide within 4A of 30S r-protein S7 (chain G in 2WDK)
1373	G	rprotein	16S nucleotide within 4A of 30S r-protein S7 (chain G in 2WDK)
1290	G	rprotein	16S nucleotide within 4A of 30S r-protein S7 (chain G in 2WDK)
1239	A	rprotein	16S nucleotide within 4A of 30S r-protein S7 (chain G in 2WDK)
599	C	rprotein	16S nucleotide within 4A of 30S r-protein S8 (chain H in 2WDK)
598	U	rprotein	16S nucleotide within 4A of 30S r-protein S8 (chain H in 2WDK)
640	A	rprotein	16S nucleotide within 4A of 30S r-protein S8 (chain H in 2WDK)
587	G	rprotein	16S nucleotide within 4A of 30S r-protein S8 (chain H in 2WDK)
641	U	rprotein	16S nucleotide within 4A of 30S r-protein S8 (chain H in 2WDK)
824	C	rprotein	16S nucleotide within 4A of 30S r-protein S8 (chain H in 2WDK)
601	C	rprotein	16S nucleotide within 4A of 30S r-protein S8 (chain H in 2WDK)
876	G	rprotein	16S nucleotide within 4A of 30S r-protein S8 (chain H in 2WDK)
564	C	rprotein	16S nucleotide within 4A of 30S r-protein S8 (chain H in 2WDK)
653	A	rprotein	16S nucleotide within 4A of 30S r-protein S8 (chain H in 2WDK)
597	G	rprotein	16S nucleotide within 4A of 30S r-protein S8 (chain H in 2WDK)
654	G	rprotein	16S nucleotide within 4A of 30S r-protein S8 (chain H in 2WDK)
644	G	rprotein	16S nucleotide within 4A of 30S r-protein S8 (chain H in 2WDK)
565	U	rprotein	16S nucleotide within 4A of 30S r-protein S8 (chain H in 2WDK)
600	C	rprotein	16S nucleotide within 4A of 30S r-protein S8 (chain H in 2WDK)
878	G	rprotein	16S nucleotide within 4A of 30S r-protein S8 (chain H in 2WDK)
860	A	rprotein	16S nucleotide within 4A of 30S r-protein S8 (chain H in 2WDK)
827	U	rprotein	16S nucleotide within 4A of 30S r-protein S8 (chain H in 2WDK)
591	U	rprotein	16S nucleotide within 4A of 30S r-protein S8 (chain H in 2WDK)
877	C	rprotein	16S nucleotide within 4A of 30S r-protein S8 (chain H in 2WDK)
588	G	rprotein	16S nucleotide within 4A of 30S r-protein S8 (chain H in 2WDK)
642	A	rprotein	16S nucleotide within 4A of 30S r-protein S8 (chain H in 2WDK)
861	G	rprotein	16S nucleotide within 4A of 30S r-protein S8 (chain H in 2WDK)
826	C	rprotein	16S nucleotide within 4A of 30S r-protein S8 (chain H in 2WDK)
590	C	rprotein	16S nucleotide within 4A of 30S r-protein S8 (chain H in 2WDK)
828	A	rprotein	16S nucleotide within 4A of 30S r-protein S8 (chain H in 2WDK)
589	C	rprotein	16S nucleotide within 4A of 30S r-protein S8 (chain H in 2WDK)
643	C	rprotein	16S nucleotide within 4A of 30S r-protein S8 (chain H in 2WDK)
825	G	rprotein	16S nucleotide within 4A of 30S r-protein S8 (chain H in 2WDK)
875	C	rprotein	16S nucleotide within 4A of 30S r-protein S8 (chain H in 2WDK)
652	U	rprotein	16S nucleotide within 4A of 30S r-protein S8 (chain H in 2WDK)
756	C	rprotein	16S nucleotide within 4A of 30S r-protein S8 (chain H in 2WDK)
586	C	rprotein	16S nucleotide within 4A of 30S r-protein S8 (chain H in 2WDK)
879	C	rprotein	16S nucleotide within 4A of 30S r-protein S8 (chain H in 2WDK)
823	G	rprotein	16S nucleotide within 4A of 30S r-protein S8 (chain H in 2WDK)
1370	G	rprotein	16S nucleotide within 4A of 30S r-protein S9 (chain I in 2WDK)
1231	G	rprotein	16S nucleotide within 4A of 30S r-protein S9 (chain I in 2WDK)
1119	C	rprotein	16S nucleotide within 4A of 30S r-protein S9 (chain I in 2WDK)
1131	G	rprotein	16S nucleotide within 4A of 30S r-protein S9 (chain I in 2WDK)
1342	C	rprotein	16S nucleotide within 4A of 30S r-protein S9 (chain I in 2WDK)
941	G	rprotein	16S nucleotide within 4A of 30S r-protein S9 (chain I in 2WDK)
1179	A	rprotein	16S nucleotide within 4A of 30S r-protein S9 (chain I in 2WDK)
1369	C	rprotein	16S nucleotide within 4A of 30S r-protein S9 (chain I in 2WDK)
1349	A	rprotein	16S nucleotide within 4A of 30S r-protein S9 (chain I in 2WDK)
969	A	rprotein	16S nucleotide within 4A of 30S r-protein S9 (chain I in 2WDK)
1232	U	rprotein	16S nucleotide within 4A of 30S r-protein S9 (chain I in 2WDK)
1233	G	rprotein	16S nucleotide within 4A of 30S r-protein S9 (chain I in 2WDK)
1366	C	rprotein	16S nucleotide within 4A of 30S r-protein S9 (chain I in 2WDK)
1347	G	rprotein	16S nucleotide within 4A of 30S r-protein S9 (chain I in 2WDK)
1373	G	rprotein	16S nucleotide within 4A of 30S r-protein S9 (chain I in 2WDK)
1148	U	rprotein	16S nucleotide within 4A of 30S r-protein S9 (chain I in 2WDK)
1147	C	rprotein	16S nucleotide within 4A of 30S r-protein S9 (chain I in 2WDK)
1128	C	rprotein	16S nucleotide within 4A of 30S r-protein S9 (chain I in 2WDK)
1343	G	rprotein	16S nucleotide within 4A of 30S r-protein S9 (chain I in 2WDK)
1180	A	rprotein	16S nucleotide within 4A of 30S r-protein S9 (chain I in 2WDK)
1367	C	rprotein	16S nucleotide within 4A of 30S r-protein S9 (chain I in 2WDK)
1348	U	rprotein	16S nucleotide within 4A of 30S r-protein S9 (chain I in 2WDK)
1149	C	rprotein	16S nucleotide within 4A of 30S r-protein S9 (chain I in 2WDK)
942	G	rprotein	16S nucleotide within 4A of 30S r-protein S9 (chain I in 2WDK)
1292	U	rprotein	16S nucleotide within 4A of 30S r-protein S9 (chain I in 2WDK)
1130	A	rprotein	16S nucleotide within 4A of 30S r-protein S9 (chain I in 2WDK)
1248	A	rprotein	16S nucleotide within 4A of 30S r-protein S9 (chain I in 2WDK)
1251	A	rprotein	16S nucleotide within 4A of 30S r-protein S9 (chain I in 2WDK)
1346	A	rprotein	16S nucleotide within 4A of 30S r-protein S9 (chain I in 2WDK)
1118	C	rprotein	16S nucleotide within 4A of 30S r-protein S9 (chain I in 2WDK)
1186	G	rprotein	16S nucleotide within 4A of 30S r-protein S9 (chain I in 2WDK)
943	U	rprotein	16S nucleotide within 4A of 30S r-protein S9 (chain I in 2WDK)
1351	U	rprotein	16S nucleotide within 4A of 30S r-protein S9 (chain I in 2WDK)
1129	C	rprotein	16S nucleotide within 4A of 30S r-protein S9 (chain I in 2WDK)
1344	C	rprotein	16S nucleotide within 4A of 30S r-protein S9 (chain I in 2WDK)
967	C	rprotein	16S nucleotide within 4A of 30S r-protein S9 (chain I in 2WDK)
966	G	rprotein	16S nucleotide within 4A of 30S r-protein S9 (chain I in 2WDK)
1350	A	rprotein	16S nucleotide within 4A of 30S r-protein S9 (chain I in 2WDK)
1371	G	rprotein	16S nucleotide within 4A of 30S r-protein S9 (chain I in 2WDK)
1372	U	rprotein	16S nucleotide within 4A of 30S r-protein S9 (chain I in 2WDK)
1188	A	rprotein	16S nucleotide within 4A of 30S r-protein S9 (chain I in 2WDK)
1291	G	rprotein	16S nucleotide within 4A of 30S r-protein S9 (chain I in 2WDK)
1250	A	rprotein	16S nucleotide within 4A of 30S r-protein S9 (chain I in 2WDK)
1177	G	rprotein	16S nucleotide within 4A of 30S r-protein S9 (chain I in 2WDK)
1178	G	rprotein	16S nucleotide within 4A of 30S r-protein S9 (chain I in 2WDK)
1249	C	rprotein	16S nucleotide within 4A of 30S r-protein S9 (chain I in 2WDK)
1117	G	rprotein	16S nucleotide within 4A of 30S r-protein S9 (chain I in 2WDK)
1345	U	rprotein	16S nucleotide within 4A of 30S r-protein S9 (chain I in 2WDK)
1290	G	rprotein	16S nucleotide within 4A of 30S r-protein S9 (chain I in 2WDK)
1187	G	rprotein	16S nucleotide within 4A of 30S r-protein S9 (chain I in 2WDK)
970	C	rprotein	16S nucleotide within 4A of 30S r-protein S9 (chain I in 2WDK)
1368	G	rprotein	16S nucleotide within 4A of 30S r-protein S9 (chain I in 2WDK)
1278	U	rprotein	16S nucleotide within 4A of 30S r-protein S10 (chain J in 2WDK)
1060	C	rprotein	16S nucleotide within 4A of 30S r-protein S10 (chain J in 2WDK)
1123	A	rprotein	16S nucleotide within 4A of 30S r-protein S10 (chain J in 2WDK)
1058	G	rprotein	16S nucleotide within 4A of 30S r-protein S10 (chain J in 2WDK)
1255	G	rprotein	16S nucleotide within 4A of 30S r-protein S10 (chain J in 2WDK)
1201	A	rprotein	16S nucleotide within 4A of 30S r-protein S10 (chain J in 2WDK)
1152	A	rprotein	16S nucleotide within 4A of 30S r-protein S10 (chain J in 2WDK)
1366	C	rprotein	16S nucleotide within 4A of 30S r-protein S10 (chain J in 2WDK)
1197	G	rprotein	16S nucleotide within 4A of 30S r-protein S10 (chain J in 2WDK)
1202	G	rprotein	16S nucleotide within 4A of 30S r-protein S10 (chain J in 2WDK)
1150	U	rprotein	16S nucleotide within 4A of 30S r-protein S10 (chain J in 2WDK)
1189	C	rprotein	16S nucleotide within 4A of 30S r-protein S10 (chain J in 2WDK)
973	G	rprotein	16S nucleotide within 4A of 30S r-protein S10 (chain J in 2WDK)
1059	C	rprotein	16S nucleotide within 4A of 30S r-protein S10 (chain J in 2WDK)
1115	C	rprotein	16S nucleotide within 4A of 30S r-protein S10 (chain J in 2WDK)
963	G	rprotein	16S nucleotide within 4A of 30S r-protein S10 (chain J in 2WDK)
1367	C	rprotein	16S nucleotide within 4A of 30S r-protein S10 (chain J in 2WDK)
975	A	rprotein	16S nucleotide within 4A of 30S r-protein S10 (chain J in 2WDK)
1280	A	rprotein	16S nucleotide within 4A of 30S r-protein S10 (chain J in 2WDK)
1061	G	rprotein	16S nucleotide within 4A of 30S r-protein S10 (chain J in 2WDK)
1279	A	rprotein	16S nucleotide within 4A of 30S r-protein S10 (chain J in 2WDK)
1153	C	rprotein	16S nucleotide within 4A of 30S r-protein S10 (chain J in 2WDK)
972	C	rprotein	16S nucleotide within 4A of 30S r-protein S10 (chain J in 2WDK)
1151	A	rprotein	16S nucleotide within 4A of 30S r-protein S10 (chain J in 2WDK)
1254	C	rprotein	16S nucleotide within 4A of 30S r-protein S10 (chain J in 2WDK)
1199	U	rprotein	16S nucleotide within 4A of 30S r-protein S10 (chain J in 2WDK)
1124	G	rprotein	16S nucleotide within 4A of 30S r-protein S10 (chain J in 2WDK)
1198	G	rprotein	16S nucleotide within 4A of 30S r-protein S10 (chain J in 2WDK)
1253	G	rprotein	16S nucleotide within 4A of 30S r-protein S10 (chain J in 2WDK)
1125	U	rprotein	16S nucleotide within 4A of 30S r-protein S10 (chain J in 2WDK)
1281	U	rprotein	16S nucleotide within 4A of 30S r-protein S10 (chain J in 2WDK)
1368	G	rprotein	16S nucleotide within 4A of 30S r-protein S10 (chain J in 2WDK)
796	C	rprotein	16S nucleotide within 4A of 30S r-protein S11 (chain K in 2WDK)
1522	U	rprotein	16S nucleotide within 4A of 30S r-protein S11 (chain K in 2WDK)
1525	G	rprotein	16S nucleotide within 4A of 30S r-protein S11 (chain K in 2WDK)
689	C	rprotein	16S nucleotide within 4A of 30S r-protein S11 (chain K in 2WDK)
1524	C	rprotein	16S nucleotide within 4A of 30S r-protein S11 (chain K in 2WDK)
691	G	rprotein	16S nucleotide within 4A of 30S r-protein S11 (chain K in 2WDK)
708	C	rprotein	16S nucleotide within 4A of 30S r-protein S11 (chain K in 2WDK)
1523	G	rprotein	16S nucleotide within 4A of 30S r-protein S11 (chain K in 2WDK)
779	C	rprotein	16S nucleotide within 4A of 30S r-protein S11 (chain K in 2WDK)
675	A	rprotein	16S nucleotide within 4A of 30S r-protein S11 (chain K in 2WDK)
690	G	rprotein	16S nucleotide within 4A of 30S r-protein S11 (chain K in 2WDK)
718	G	rprotein	16S nucleotide within 4A of 30S r-protein S11 (chain K in 2WDK)
694	A	rprotein	16S nucleotide within 4A of 30S r-protein S11 (chain K in 2WDK)
688	G	rprotein	16S nucleotide within 4A of 30S r-protein S11 (chain K in 2WDK)
676	A	rprotein	16S nucleotide within 4A of 30S r-protein S11 (chain K in 2WDK)
780	A	rprotein	16S nucleotide within 4A of 30S r-protein S11 (chain K in 2WDK)
686	U	rprotein	16S nucleotide within 4A of 30S r-protein S11 (chain K in 2WDK)
717	C	rprotein	16S nucleotide within 4A of 30S r-protein S11 (chain K in 2WDK)
707	C	rprotein	16S nucleotide within 4A of 30S r-protein S11 (chain K in 2WDK)
704	A	rprotein	16S nucleotide within 4A of 30S r-protein S11 (chain K in 2WDK)
716	A	rprotein	16S nucleotide within 4A of 30S r-protein S11 (chain K in 2WDK)
778	G	rprotein	16S nucleotide within 4A of 30S r-protein S11 (chain K in 2WDK)
684	A	rprotein	16S nucleotide within 4A of 30S r-protein S11 (chain K in 2WDK)
674	G	rprotein	16S nucleotide within 4A of 30S r-protein S11 (chain K in 2WDK)
695	A	rprotein	16S nucleotide within 4A of 30S r-protein S11 (chain K in 2WDK)
797	C	rprotein	16S nucleotide within 4A of 30S r-protein S11 (chain K in 2WDK)
692	U	rprotein	16S nucleotide within 4A of 30S r-protein S11 (chain K in 2WDK)
687	A	rprotein	16S nucleotide within 4A of 30S r-protein S11 (chain K in 2WDK)
798	G	rprotein	16S nucleotide within 4A of 30S r-protein S11 (chain K in 2WDK)
777	A	rprotein	16S nucleotide within 4A of 30S r-protein S11 (chain K in 2WDK)
677	U	rprotein	16S nucleotide within 4A of 30S r-protein S11 (chain K in 2WDK)
685	G	rprotein	16S nucleotide within 4A of 30S r-protein S11 (chain K in 2WDK)
706	A	rprotein	16S nucleotide within 4A of 30S r-protein S11 (chain K in 2WDK)
714	G	rprotein	16S nucleotide within 4A of 30S r-protein S11 (chain K in 2WDK)
683	G	rprotein	16S nucleotide within 4A of 30S r-protein S11 (chain K in 2WDK)
1492	A	rprotein	16S nucleotide within 4A of 30S r-protein S12 (chain L in 2WDK)
880	C	rprotein	16S nucleotide within 4A of 30S r-protein S12 (chain L in 2WDK)
522	C	rprotein	16S nucleotide within 4A of 30S r-protein S12 (chain L in 2WDK)
912	C	rprotein	16S nucleotide within 4A of 30S r-protein S12 (chain L in 2WDK)
34	C	rprotein	16S nucleotide within 4A of 30S r-protein S12 (chain L in 2WDK)
302	G	rprotein	16S nucleotide within 4A of 30S r-protein S12 (chain L in 2WDK)
1490	C	rprotein	16S nucleotide within 4A of 30S r-protein S12 (chain L in 2WDK)
520	A	rprotein	16S nucleotide within 4A of 30S r-protein S12 (chain L in 2WDK)
525	C	rprotein	16S nucleotide within 4A of 30S r-protein S12 (chain L in 2WDK)
528	C	rprotein	16S nucleotide within 4A of 30S r-protein S12 (chain L in 2WDK)
881	G	rprotein	16S nucleotide within 4A of 30S r-protein S12 (chain L in 2WDK)
1411	C	rprotein	16S nucleotide within 4A of 30S r-protein S12 (chain L in 2WDK)
502	G	rprotein	16S nucleotide within 4A of 30S r-protein S12 (chain L in 2WDK)
550	G	rprotein	16S nucleotide within 4A of 30S r-protein S12 (chain L in 2WDK)
913	A	rprotein	16S nucleotide within 4A of 30S r-protein S12 (chain L in 2WDK)
537	G	rprotein	16S nucleotide within 4A of 30S r-protein S12 (chain L in 2WDK)
538	G	rprotein	16S nucleotide within 4A of 30S r-protein S12 (chain L in 2WDK)
1491	G	rprotein	16S nucleotide within 4A of 30S r-protein S12 (chain L in 2WDK)
527	G	rprotein	16S nucleotide within 4A of 30S r-protein S12 (chain L in 2WDK)
526	C	rprotein	16S nucleotide within 4A of 30S r-protein S12 (chain L in 2WDK)
554	C	rprotein	16S nucleotide within 4A of 30S r-protein S12 (chain L in 2WDK)
364	A	rprotein	16S nucleotide within 4A of 30S r-protein S12 (chain L in 2WDK)
33	A	rprotein	16S nucleotide within 4A of 30S r-protein S12 (chain L in 2WDK)
519	C	rprotein	16S nucleotide within 4A of 30S r-protein S12 (chain L in 2WDK)
362	G	rprotein	16S nucleotide within 4A of 30S r-protein S12 (chain L in 2WDK)
911	U	rprotein	16S nucleotide within 4A of 30S r-protein S12 (chain L in 2WDK)
503	C	rprotein	16S nucleotide within 4A of 30S r-protein S12 (chain L in 2WDK)
585	G	rprotein	16S nucleotide within 4A of 30S r-protein S12 (chain L in 2WDK)
910	C	rprotein	16S nucleotide within 4A of 30S r-protein S12 (chain L in 2WDK)
883	C	rprotein	16S nucleotide within 4A of 30S r-protein S12 (chain L in 2WDK)
500	G	rprotein	16S nucleotide within 4A of 30S r-protein S12 (chain L in 2WDK)
529	G	rprotein	16S nucleotide within 4A of 30S r-protein S12 (chain L in 2WDK)
884	U	rprotein	16S nucleotide within 4A of 30S r-protein S12 (chain L in 2WDK)
32	A	rprotein	16S nucleotide within 4A of 30S r-protein S12 (chain L in 2WDK)
37	U	rprotein	16S nucleotide within 4A of 30S r-protein S12 (chain L in 2WDK)
539	A	rprotein	16S nucleotide within 4A of 30S r-protein S12 (chain L in 2WDK)
564	C	rprotein	16S nucleotide within 4A of 30S r-protein S12 (chain L in 2WDK)
552	U	rprotein	16S nucleotide within 4A of 30S r-protein S12 (chain L in 2WDK)
556	C	rprotein	16S nucleotide within 4A of 30S r-protein S12 (chain L in 2WDK)
518	C	rprotein	16S nucleotide within 4A of 30S r-protein S12 (chain L in 2WDK)
523	A	rprotein	16S nucleotide within 4A of 30S r-protein S12 (chain L in 2WDK)
553	A	rprotein	16S nucleotide within 4A of 30S r-protein S12 (chain L in 2WDK)
501	C	rprotein	16S nucleotide within 4A of 30S r-protein S12 (chain L in 2WDK)
882	C	rprotein	16S nucleotide within 4A of 30S r-protein S12 (chain L in 2WDK)
303	A	rprotein	16S nucleotide within 4A of 30S r-protein S12 (chain L in 2WDK)
551	U	rprotein	16S nucleotide within 4A of 30S r-protein S12 (chain L in 2WDK)
36	C	rprotein	16S nucleotide within 4A of 30S r-protein S12 (chain L in 2WDK)
241	C	rprotein	16S nucleotide within 4A of 30S r-protein S12 (chain L in 2WDK)
363	A	rprotein	16S nucleotide within 4A of 30S r-protein S12 (chain L in 2WDK)
35	G	rprotein	16S nucleotide within 4A of 30S r-protein S12 (chain L in 2WDK)
909	A	rprotein	16S nucleotide within 4A of 30S r-protein S12 (chain L in 2WDK)
568	G	rprotein	16S nucleotide within 4A of 30S r-protein S12 (chain L in 2WDK)
567	G	rprotein	16S nucleotide within 4A of 30S r-protein S12 (chain L in 2WDK)
563	A	rprotein	16S nucleotide within 4A of 30S r-protein S12 (chain L in 2WDK)
521	G	rprotein	16S nucleotide within 4A of 30S r-protein S12 (chain L in 2WDK)
879	C	rprotein	16S nucleotide within 4A of 30S r-protein S12 (chain L in 2WDK)
562	C	rprotein	16S nucleotide within 4A of 30S r-protein S12 (chain L in 2WDK)
1321	C	rprotein	16S nucleotide within 4A of 30S r-protein S13 (chain M in 2WDK)
955	U	rprotein	16S nucleotide within 4A of 30S r-protein S13 (chain M in 2WDK)
949	A	rprotein	16S nucleotide within 4A of 30S r-protein S13 (chain M in 2WDK)
1309	G	rprotein	16S nucleotide within 4A of 30S r-protein S13 (chain M in 2WDK)
1296	C	rprotein	16S nucleotide within 4A of 30S r-protein S13 (chain M in 2WDK)
1227	A	rprotein	16S nucleotide within 4A of 30S r-protein S13 (chain M in 2WDK)
951	G	rprotein	16S nucleotide within 4A of 30S r-protein S13 (chain M in 2WDK)
1495	U	rprotein	16S nucleotide within 4A of 30S r-protein S13 (chain M in 2WDK)
1228	C	rprotein	16S nucleotide within 4A of 30S r-protein S13 (chain M in 2WDK)
1225	A	rprotein	16S nucleotide within 4A of 30S r-protein S13 (chain M in 2WDK)
1310	G	rprotein	16S nucleotide within 4A of 30S r-protein S13 (chain M in 2WDK)
946	A	rprotein	16S nucleotide within 4A of 30S r-protein S13 (chain M in 2WDK)
1331	G	rprotein	16S nucleotide within 4A of 30S r-protein S13 (chain M in 2WDK)
954	G	rprotein	16S nucleotide within 4A of 30S r-protein S13 (chain M in 2WDK)
1302	U	rprotein	16S nucleotide within 4A of 30S r-protein S13 (chain M in 2WDK)
1301	U	rprotein	16S nucleotide within 4A of 30S r-protein S13 (chain M in 2WDK)
948	C	rprotein	16S nucleotide within 4A of 30S r-protein S13 (chain M in 2WDK)
1297	C	rprotein	16S nucleotide within 4A of 30S r-protein S13 (chain M in 2WDK)
1330	U	rprotein	16S nucleotide within 4A of 30S r-protein S13 (chain M in 2WDK)
1322	C	rprotein	16S nucleotide within 4A of 30S r-protein S13 (chain M in 2WDK)
1328	C	rprotein	16S nucleotide within 4A of 30S r-protein S13 (chain M in 2WDK)
952	U	rprotein	16S nucleotide within 4A of 30S r-protein S13 (chain M in 2WDK)
1229	A	rprotein	16S nucleotide within 4A of 30S r-protein S13 (chain M in 2WDK)
1230	C	rprotein	16S nucleotide within 4A of 30S r-protein S13 (chain M in 2WDK)
1226	C	rprotein	16S nucleotide within 4A of 30S r-protein S13 (chain M in 2WDK)
1329	A	rprotein	16S nucleotide within 4A of 30S r-protein S13 (chain M in 2WDK)
1295	G	rprotein	16S nucleotide within 4A of 30S r-protein S13 (chain M in 2WDK)
1308	U	rprotein	16S nucleotide within 4A of 30S r-protein S13 (chain M in 2WDK)
950	U	rprotein	16S nucleotide within 4A of 30S r-protein S13 (chain M in 2WDK)
953	G	rprotein	16S nucleotide within 4A of 30S r-protein S13 (chain M in 2WDK)
1307	U	rprotein	16S nucleotide within 4A of 30S r-protein S13 (chain M in 2WDK)
1494	G	rprotein	16S nucleotide within 4A of 30S r-protein S13 (chain M in 2WDK)
1320	C	rprotein	16S nucleotide within 4A of 30S r-protein S13 (chain M in 2WDK)
947	G	rprotein	16S nucleotide within 4A of 30S r-protein S13 (chain M in 2WDK)
1306	A	rprotein	16S nucleotide within 4A of 30S r-protein S13 (chain M in 2WDK)
1047	G	rprotein	16S nucleotide within 4A of 30S r-protein S14 (chain N in 2WDK)
1060	C	rprotein	16S nucleotide within 4A of 30S r-protein S14 (chain N in 2WDK)
1015	A	rprotein	16S nucleotide within 4A of 30S r-protein S14 (chain N in 2WDK)
1316	G	rprotein	16S nucleotide within 4A of 30S r-protein S14 (chain N in 2WDK)
1049	U	rprotein	16S nucleotide within 4A of 30S r-protein S14 (chain N in 2WDK)
1369	C	rprotein	16S nucleotide within 4A of 30S r-protein S14 (chain N in 2WDK)
1360	A	rprotein	16S nucleotide within 4A of 30S r-protein S14 (chain N in 2WDK)
1203	C	rprotein	16S nucleotide within 4A of 30S r-protein S14 (chain N in 2WDK)
1048	G	rprotein	16S nucleotide within 4A of 30S r-protein S14 (chain N in 2WDK)
977	A	rprotein	16S nucleotide within 4A of 30S r-protein S14 (chain N in 2WDK)
1016	A	rprotein	16S nucleotide within 4A of 30S r-protein S14 (chain N in 2WDK)
1358	U	rprotein	16S nucleotide within 4A of 30S r-protein S14 (chain N in 2WDK)
1202	G	rprotein	16S nucleotide within 4A of 30S r-protein S14 (chain N in 2WDK)
981	U	rprotein	16S nucleotide within 4A of 30S r-protein S14 (chain N in 2WDK)
1359	C	rprotein	16S nucleotide within 4A of 30S r-protein S14 (chain N in 2WDK)
1219	U	rprotein	16S nucleotide within 4A of 30S r-protein S14 (chain N in 2WDK)
979	C	rprotein	16S nucleotide within 4A of 30S r-protein S14 (chain N in 2WDK)
1189	C	rprotein	16S nucleotide within 4A of 30S r-protein S14 (chain N in 2WDK)
980	C	rprotein	16S nucleotide within 4A of 30S r-protein S14 (chain N in 2WDK)
973	G	rprotein	16S nucleotide within 4A of 30S r-protein S14 (chain N in 2WDK)
1059	C	rprotein	16S nucleotide within 4A of 30S r-protein S14 (chain N in 2WDK)
1115	C	rprotein	16S nucleotide within 4A of 30S r-protein S14 (chain N in 2WDK)
1204	A	rprotein	16S nucleotide within 4A of 30S r-protein S14 (chain N in 2WDK)
975	A	rprotein	16S nucleotide within 4A of 30S r-protein S14 (chain N in 2WDK)
1186	G	rprotein	16S nucleotide within 4A of 30S r-protein S14 (chain N in 2WDK)
994	A	rprotein	16S nucleotide within 4A of 30S r-protein S14 (chain N in 2WDK)
1317	C	rprotein	16S nucleotide within 4A of 30S r-protein S14 (chain N in 2WDK)
983	A	rprotein	16S nucleotide within 4A of 30S r-protein S14 (chain N in 2WDK)
1216	G	rprotein	16S nucleotide within 4A of 30S r-protein S14 (chain N in 2WDK)
1357	A	rprotein	16S nucleotide within 4A of 30S r-protein S14 (chain N in 2WDK)
974	A	rprotein	16S nucleotide within 4A of 30S r-protein S14 (chain N in 2WDK)
1217	C	rprotein	16S nucleotide within 4A of 30S r-protein S14 (chain N in 2WDK)
1114	C	rprotein	16S nucleotide within 4A of 30S r-protein S14 (chain N in 2WDK)
1188	A	rprotein	16S nucleotide within 4A of 30S r-protein S14 (chain N in 2WDK)
982	U	rprotein	16S nucleotide within 4A of 30S r-protein S14 (chain N in 2WDK)
976	G	rprotein	16S nucleotide within 4A of 30S r-protein S14 (chain N in 2WDK)
1368	G	rprotein	16S nucleotide within 4A of 30S r-protein S14 (chain N in 2WDK)
1187	G	rprotein	16S nucleotide within 4A of 30S r-protein S14 (chain N in 2WDK)
995	C	rprotein	16S nucleotide within 4A of 30S r-protein S14 (chain N in 2WDK)
1218	C	rprotein	16S nucleotide within 4A of 30S r-protein S14 (chain N in 2WDK)
579	G	rprotein	16S nucleotide within 4A of 30S r-protein S15 (chain O in 2WDK)
730	G	rprotein	16S nucleotide within 4A of 30S r-protein S15 (chain O in 2WDK)
755	G	rprotein	16S nucleotide within 4A of 30S r-protein S15 (chain O in 2WDK)
742	G	rprotein	16S nucleotide within 4A of 30S r-protein S15 (chain O in 2WDK)
752	G	rprotein	16S nucleotide within 4A of 30S r-protein S15 (chain O in 2WDK)
657	G	rprotein	16S nucleotide within 4A of 30S r-protein S15 (chain O in 2WDK)
764	C	rprotein	16S nucleotide within 4A of 30S r-protein S15 (chain O in 2WDK)
666	G	rprotein	16S nucleotide within 4A of 30S r-protein S15 (chain O in 2WDK)
754	C	rprotein	16S nucleotide within 4A of 30S r-protein S15 (chain O in 2WDK)
749	C	rprotein	16S nucleotide within 4A of 30S r-protein S15 (chain O in 2WDK)
581	G	rprotein	16S nucleotide within 4A of 30S r-protein S15 (chain O in 2WDK)
765	G	rprotein	16S nucleotide within 4A of 30S r-protein S15 (chain O in 2WDK)
669	U	rprotein	16S nucleotide within 4A of 30S r-protein S15 (chain O in 2WDK)
660	G	rprotein	16S nucleotide within 4A of 30S r-protein S15 (chain O in 2WDK)
739	C	rprotein	16S nucleotide within 4A of 30S r-protein S15 (chain O in 2WDK)
750	G	rprotein	16S nucleotide within 4A of 30S r-protein S15 (chain O in 2WDK)
658	G	rprotein	16S nucleotide within 4A of 30S r-protein S15 (chain O in 2WDK)
753	A	rprotein	16S nucleotide within 4A of 30S r-protein S15 (chain O in 2WDK)
728	A	rprotein	16S nucleotide within 4A of 30S r-protein S15 (chain O in 2WDK)
740	U	rprotein	16S nucleotide within 4A of 30S r-protein S15 (chain O in 2WDK)
751	U	rprotein	16S nucleotide within 4A of 30S r-protein S15 (chain O in 2WDK)
741	G	rprotein	16S nucleotide within 4A of 30S r-protein S15 (chain O in 2WDK)
659	U	rprotein	16S nucleotide within 4A of 30S r-protein S15 (chain O in 2WDK)
582	U	rprotein	16S nucleotide within 4A of 30S r-protein S15 (chain O in 2WDK)
729	A	rprotein	16S nucleotide within 4A of 30S r-protein S15 (chain O in 2WDK)
668	G	rprotein	16S nucleotide within 4A of 30S r-protein S15 (chain O in 2WDK)
656	C	rprotein	16S nucleotide within 4A of 30S r-protein S15 (chain O in 2WDK)
580	U	rprotein	16S nucleotide within 4A of 30S r-protein S15 (chain O in 2WDK)
808	C	rprotein	16S nucleotide within 4A of 30S r-protein S15 (chain O in 2WDK)
809	G	rprotein	16S nucleotide within 4A of 30S r-protein S15 (chain O in 2WDK)
667	G	rprotein	16S nucleotide within 4A of 30S r-protein S15 (chain O in 2WDK)
453	A	rprotein	16S nucleotide within 4A of 30S r-protein S16 (chain P in 2WDK)
390	C	rprotein	16S nucleotide within 4A of 30S r-protein S16 (chain P in 2WDK)
391	G	rprotein	16S nucleotide within 4A of 30S r-protein S16 (chain P in 2WDK)
309	G	rprotein	16S nucleotide within 4A of 30S r-protein S16 (chain P in 2WDK)
473	G	rprotein	16S nucleotide within 4A of 30S r-protein S16 (chain P in 2WDK)
393	A	rprotein	16S nucleotide within 4A of 30S r-protein S16 (chain P in 2WDK)
229	U	rprotein	16S nucleotide within 4A of 30S r-protein S16 (chain P in 2WDK)
376	G	rprotein	16S nucleotide within 4A of 30S r-protein S16 (chain P in 2WDK)
43	C	rprotein	16S nucleotide within 4A of 30S r-protein S16 (chain P in 2WDK)
627	G	rprotein	16S nucleotide within 4A of 30S r-protein S16 (chain P in 2WDK)
609	A	rprotein	16S nucleotide within 4A of 30S r-protein S16 (chain P in 2WDK)
137	C	rprotein	16S nucleotide within 4A of 30S r-protein S16 (chain P in 2WDK)
374	A	rprotein	16S nucleotide within 4A of 30S r-protein S16 (chain P in 2WDK)
607	A	rprotein	16S nucleotide within 4A of 30S r-protein S16 (chain P in 2WDK)
626	U	rprotein	16S nucleotide within 4A of 30S r-protein S16 (chain P in 2WDK)
472	A	rprotein	16S nucleotide within 4A of 30S r-protein S16 (chain P in 2WDK)
134	A	rprotein	16S nucleotide within 4A of 30S r-protein S16 (chain P in 2WDK)
111	G	rprotein	16S nucleotide within 4A of 30S r-protein S16 (chain P in 2WDK)
227	G	rprotein	16S nucleotide within 4A of 30S r-protein S16 (chain P in 2WDK)
623	C	rprotein	16S nucleotide within 4A of 30S r-protein S16 (chain P in 2WDK)
310	G	rprotein	16S nucleotide within 4A of 30S r-protein S16 (chain P in 2WDK)
311	C	rprotein	16S nucleotide within 4A of 30S r-protein S16 (chain P in 2WDK)
378	G	rprotein	16S nucleotide within 4A of 30S r-protein S16 (chain P in 2WDK)
625	G	rprotein	16S nucleotide within 4A of 30S r-protein S16 (chain P in 2WDK)
110	C	rprotein	16S nucleotide within 4A of 30S r-protein S16 (chain P in 2WDK)
449	C	rprotein	16S nucleotide within 4A of 30S r-protein S16 (chain P in 2WDK)
136	C	rprotein	16S nucleotide within 4A of 30S r-protein S16 (chain P in 2WDK)
617	G	rprotein	16S nucleotide within 4A of 30S r-protein S16 (chain P in 2WDK)
474	G	rprotein	16S nucleotide within 4A of 30S r-protein S16 (chain P in 2WDK)
452	A	rprotein	16S nucleotide within 4A of 30S r-protein S16 (chain P in 2WDK)
624	C	rprotein	16S nucleotide within 4A of 30S r-protein S16 (chain P in 2WDK)
451	A	rprotein	16S nucleotide within 4A of 30S r-protein S16 (chain P in 2WDK)
135	C	rprotein	16S nucleotide within 4A of 30S r-protein S16 (chain P in 2WDK)
392	G	rprotein	16S nucleotide within 4A of 30S r-protein S16 (chain P in 2WDK)
471	G	rprotein	16S nucleotide within 4A of 30S r-protein S16 (chain P in 2WDK)
44	G	rprotein	16S nucleotide within 4A of 30S r-protein S16 (chain P in 2WDK)
375	U	rprotein	16S nucleotide within 4A of 30S r-protein S16 (chain P in 2WDK)
228	A	rprotein	16S nucleotide within 4A of 30S r-protein S16 (chain P in 2WDK)
608	A	rprotein	16S nucleotide within 4A of 30S r-protein S16 (chain P in 2WDK)
450	G	rprotein	16S nucleotide within 4A of 30S r-protein S16 (chain P in 2WDK)
112	G	rprotein	16S nucleotide within 4A of 30S r-protein S16 (chain P in 2WDK)
230	G	rprotein	16S nucleotide within 4A of 30S r-protein S16 (chain P in 2WDK)
377	G	rprotein	16S nucleotide within 4A of 30S r-protein S16 (chain P in 2WDK)
598	U	rprotein	16S nucleotide within 4A of 30S r-protein S17 (chain Q in 2WDK)
635	G	rprotein	16S nucleotide within 4A of 30S r-protein S17 (chain Q in 2WDK)
278	G	rprotein	16S nucleotide within 4A of 30S r-protein S17 (chain Q in 2WDK)
273	A	rprotein	16S nucleotide within 4A of 30S r-protein S17 (chain Q in 2WDK)
256	U	rprotein	16S nucleotide within 4A of 30S r-protein S17 (chain Q in 2WDK)
265	G	rprotein	16S nucleotide within 4A of 30S r-protein S17 (chain Q in 2WDK)
266	G	rprotein	16S nucleotide within 4A of 30S r-protein S17 (chain Q in 2WDK)
254	G	rprotein	16S nucleotide within 4A of 30S r-protein S17 (chain Q in 2WDK)
564	C	rprotein	16S nucleotide within 4A of 30S r-protein S17 (chain Q in 2WDK)
582	U	rprotein	16S nucleotide within 4A of 30S r-protein S17 (chain Q in 2WDK)
280	C	rprotein	16S nucleotide within 4A of 30S r-protein S17 (chain Q in 2WDK)
585	G	rprotein	16S nucleotide within 4A of 30S r-protein S17 (chain Q in 2WDK)
238	G	rprotein	16S nucleotide within 4A of 30S r-protein S17 (chain Q in 2WDK)
253	U	rprotein	16S nucleotide within 4A of 30S r-protein S17 (chain Q in 2WDK)
235	C	rprotein	16S nucleotide within 4A of 30S r-protein S17 (chain Q in 2WDK)
759	A	rprotein	16S nucleotide within 4A of 30S r-protein S17 (chain Q in 2WDK)
127	G	rprotein	16S nucleotide within 4A of 30S r-protein S17 (chain Q in 2WDK)
761	G	rprotein	16S nucleotide within 4A of 30S r-protein S17 (chain Q in 2WDK)
255	G	rprotein	16S nucleotide within 4A of 30S r-protein S17 (chain Q in 2WDK)
584	G	rprotein	16S nucleotide within 4A of 30S r-protein S17 (chain Q in 2WDK)
583	A	rprotein	16S nucleotide within 4A of 30S r-protein S17 (chain Q in 2WDK)
597	G	rprotein	16S nucleotide within 4A of 30S r-protein S17 (chain Q in 2WDK)
128	G	rprotein	16S nucleotide within 4A of 30S r-protein S17 (chain Q in 2WDK)
760	G	rprotein	16S nucleotide within 4A of 30S r-protein S17 (chain Q in 2WDK)
264	U	rprotein	16S nucleotide within 4A of 30S r-protein S17 (chain Q in 2WDK)
647	C	rprotein	16S nucleotide within 4A of 30S r-protein S17 (chain Q in 2WDK)
247	G	rprotein	16S nucleotide within 4A of 30S r-protein S17 (chain Q in 2WDK)
276	G	rprotein	16S nucleotide within 4A of 30S r-protein S17 (chain Q in 2WDK)
275	G	rprotein	16S nucleotide within 4A of 30S r-protein S17 (chain Q in 2WDK)
237	C	rprotein	16S nucleotide within 4A of 30S r-protein S17 (chain Q in 2WDK)
236	G	rprotein	16S nucleotide within 4A of 30S r-protein S17 (chain Q in 2WDK)
596	C	rprotein	16S nucleotide within 4A of 30S r-protein S17 (chain Q in 2WDK)
130	A	rprotein	16S nucleotide within 4A of 30S r-protein S17 (chain Q in 2WDK)
267	C	rprotein	16S nucleotide within 4A of 30S r-protein S17 (chain Q in 2WDK)
277	C	rprotein	16S nucleotide within 4A of 30S r-protein S17 (chain Q in 2WDK)
636	U	rprotein	16S nucleotide within 4A of 30S r-protein S17 (chain Q in 2WDK)
279	A	rprotein	16S nucleotide within 4A of 30S r-protein S17 (chain Q in 2WDK)
246	A	rprotein	16S nucleotide within 4A of 30S r-protein S17 (chain Q in 2WDK)
586	C	rprotein	16S nucleotide within 4A of 30S r-protein S17 (chain Q in 2WDK)
234	C	rprotein	16S nucleotide within 4A of 30S r-protein S17 (chain Q in 2WDK)
835	U	rprotein	16S nucleotide within 4A of 30S r-protein S18 (chain R in 2WDK)
720	C	rprotein	16S nucleotide within 4A of 30S r-protein S18 (chain R in 2WDK)
836	G	rprotein	16S nucleotide within 4A of 30S r-protein S18 (chain R in 2WDK)
663	A	rprotein	16S nucleotide within 4A of 30S r-protein S18 (chain R in 2WDK)
735	C	rprotein	16S nucleotide within 4A of 30S r-protein S18 (chain R in 2WDK)
718	G	rprotein	16S nucleotide within 4A of 30S r-protein S18 (chain R in 2WDK)
834	C	rprotein	16S nucleotide within 4A of 30S r-protein S18 (chain R in 2WDK)
736	C	rprotein	16S nucleotide within 4A of 30S r-protein S18 (chain R in 2WDK)
673	G	rprotein	16S nucleotide within 4A of 30S r-protein S18 (chain R in 2WDK)
719	C	rprotein	16S nucleotide within 4A of 30S r-protein S18 (chain R in 2WDK)
734	G	rprotein	16S nucleotide within 4A of 30S r-protein S18 (chain R in 2WDK)
674	G	rprotein	16S nucleotide within 4A of 30S r-protein S18 (chain R in 2WDK)
721	G	rprotein	16S nucleotide within 4A of 30S r-protein S18 (chain R in 2WDK)
737	A	rprotein	16S nucleotide within 4A of 30S r-protein S18 (chain R in 2WDK)
664	G	rprotein	16S nucleotide within 4A of 30S r-protein S18 (chain R in 2WDK)
1321	C	rprotein	16S nucleotide within 4A of 30S r-protein S19 (chain S in 2WDK)
1312	G	rprotein	16S nucleotide within 4A of 30S r-protein S19 (chain S in 2WDK)
1324	A	rprotein	16S nucleotide within 4A of 30S r-protein S19 (chain S in 2WDK)
987	G	rprotein	16S nucleotide within 4A of 30S r-protein S19 (chain S in 2WDK)
1319	A	rprotein	16S nucleotide within 4A of 30S r-protein S19 (chain S in 2WDK)
1223	C	rprotein	16S nucleotide within 4A of 30S r-protein S19 (chain S in 2WDK)
959	A	rprotein	16S nucleotide within 4A of 30S r-protein S19 (chain S in 2WDK)
986	A	rprotein	16S nucleotide within 4A of 30S r-protein S19 (chain S in 2WDK)
1318	A	rprotein	16S nucleotide within 4A of 30S r-protein S19 (chain S in 2WDK)
1225	A	rprotein	16S nucleotide within 4A of 30S r-protein S19 (chain S in 2WDK)
957	U	rprotein	16S nucleotide within 4A of 30S r-protein S19 (chain S in 2WDK)
958	A	rprotein	16S nucleotide within 4A of 30S r-protein S19 (chain S in 2WDK)
1322	C	rprotein	16S nucleotide within 4A of 30S r-protein S19 (chain S in 2WDK)
1314	C	rprotein	16S nucleotide within 4A of 30S r-protein S19 (chain S in 2WDK)
1221	G	rprotein	16S nucleotide within 4A of 30S r-protein S19 (chain S in 2WDK)
1222	G	rprotein	16S nucleotide within 4A of 30S r-protein S19 (chain S in 2WDK)
1323	G	rprotein	16S nucleotide within 4A of 30S r-protein S19 (chain S in 2WDK)
1313	U	rprotein	16S nucleotide within 4A of 30S r-protein S19 (chain S in 2WDK)
1226	C	rprotein	16S nucleotide within 4A of 30S r-protein S19 (chain S in 2WDK)
960	U	rprotein	16S nucleotide within 4A of 30S r-protein S19 (chain S in 2WDK)
1220	G	rprotein	16S nucleotide within 4A of 30S r-protein S19 (chain S in 2WDK)
1219	U	rprotein	16S nucleotide within 4A of 30S r-protein S19 (chain S in 2WDK)
1224	G	rprotein	16S nucleotide within 4A of 30S r-protein S19 (chain S in 2WDK)
1320	C	rprotein	16S nucleotide within 4A of 30S r-protein S19 (chain S in 2WDK)
1014	A	rprotein	16S nucleotide within 4A of 30S r-protein S19 (chain S in 2WDK)
1317	C	rprotein	16S nucleotide within 4A of 30S r-protein S19 (chain S in 2WDK)
105	G	rprotein	16S nucleotide within 4A of 30S r-protein S20 (chain T in 2WDK)
323	U	rprotein	16S nucleotide within 4A of 30S r-protein S20 (chain T in 2WDK)
259	G	rprotein	16S nucleotide within 4A of 30S r-protein S20 (chain T in 2WDK)
131	C	rprotein	16S nucleotide within 4A of 30S r-protein S20 (chain T in 2WDK)
1440	C	rprotein	16S nucleotide within 4A of 30S r-protein S20 (chain T in 2WDK)
322	C	rprotein	16S nucleotide within 4A of 30S r-protein S20 (chain T in 2WDK)
196	A	rprotein	16S nucleotide within 4A of 30S r-protein S20 (chain T in 2WDK)
258	G	rprotein	16S nucleotide within 4A of 30S r-protein S20 (chain T in 2WDK)
177	C	rprotein	16S nucleotide within 4A of 30S r-protein S20 (chain T in 2WDK)
193	C	rprotein	16S nucleotide within 4A of 30S r-protein S20 (chain T in 2WDK)
1439	C	rprotein	16S nucleotide within 4A of 30S r-protein S20 (chain T in 2WDK)
1436	U	rprotein	16S nucleotide within 4A of 30S r-protein S20 (chain T in 2WDK)
194	C	rprotein	16S nucleotide within 4A of 30S r-protein S20 (chain T in 2WDK)
106	C	rprotein	16S nucleotide within 4A of 30S r-protein S20 (chain T in 2WDK)
332	G	rprotein	16S nucleotide within 4A of 30S r-protein S20 (chain T in 2WDK)
1456	G	rprotein	16S nucleotide within 4A of 30S r-protein S20 (chain T in 2WDK)
102	G	rprotein	16S nucleotide within 4A of 30S r-protein S20 (chain T in 2WDK)
176	C	rprotein	16S nucleotide within 4A of 30S r-protein S20 (chain T in 2WDK)
261	U	rprotein	16S nucleotide within 4A of 30S r-protein S20 (chain T in 2WDK)
1438	G	rprotein	16S nucleotide within 4A of 30S r-protein S20 (chain T in 2WDK)
1437	C	rprotein	16S nucleotide within 4A of 30S r-protein S20 (chain T in 2WDK)
1441	G	rprotein	16S nucleotide within 4A of 30S r-protein S20 (chain T in 2WDK)
195	A	rprotein	16S nucleotide within 4A of 30S r-protein S20 (chain T in 2WDK)
260	G	rprotein	16S nucleotide within 4A of 30S r-protein S20 (chain T in 2WDK)
192	U	rprotein	16S nucleotide within 4A of 30S r-protein S20 (chain T in 2WDK)
186	C	rprotein	16S nucleotide within 4A of 30S r-protein S20 (chain T in 2WDK)
133	U	rprotein	16S nucleotide within 4A of 30S r-protein S20 (chain T in 2WDK)
175	C	rprotein	16S nucleotide within 4A of 30S r-protein S20 (chain T in 2WDK)
108	G	rprotein	16S nucleotide within 4A of 30S r-protein S20 (chain T in 2WDK)
185	A	rprotein	16S nucleotide within 4A of 30S r-protein S20 (chain T in 2WDK)
333	G	rprotein	16S nucleotide within 4A of 30S r-protein S20 (chain T in 2WDK)
1458	G	rprotein	16S nucleotide within 4A of 30S r-protein S20 (chain T in 2WDK)
104	G	rprotein	16S nucleotide within 4A of 30S r-protein S20 (chain T in 2WDK)
107	G	rprotein	16S nucleotide within 4A of 30S r-protein S20 (chain T in 2WDK)
61	G	rprotein	16S nucleotide within 4A of 30S r-protein S20 (chain T in 2WDK)
1457	G	rprotein	16S nucleotide within 4A of 30S r-protein S20 (chain T in 2WDK)
262	A	rprotein	16S nucleotide within 4A of 30S r-protein S20 (chain T in 2WDK)
187	C	rprotein	16S nucleotide within 4A of 30S r-protein S20 (chain T in 2WDK)
191	G	rprotein	16S nucleotide within 4A of 30S r-protein S20 (chain T in 2WDK)
178	C	rprotein	16S nucleotide within 4A of 30S r-protein S20 (chain T in 2WDK)
188	C	rprotein	16S nucleotide within 4A of 30S r-protein S20 (chain T in 2WDK)
132	C	rprotein	16S nucleotide within 4A of 30S r-protein S20 (chain T in 2WDK)
263	A	rprotein	16S nucleotide within 4A of 30S r-protein S20 (chain T in 2WDK)
1459	C	rprotein	16S nucleotide within 4A of 30S r-protein S20 (chain T in 2WDK)
163	C	rprotein	16S nucleotide within 4A of 30S r-protein S20 (chain T in 2WDK)
324	G	rprotein	16S nucleotide within 4A of 30S r-protein S20 (chain T in 2WDK)
103	C	rprotein	16S nucleotide within 4A of 30S r-protein S20 (chain T in 2WDK)
325	A	rprotein	16S nucleotide within 4A of 30S r-protein S20 (chain T in 2WDK)
190	U	rprotein	16S nucleotide within 4A of 30S r-protein S20 (chain T in 2WDK)
1329	A	rprotein	16S nucleotide within 4A of 30S r-protein THX (chain U in 2WDK)
1326	C	rprotein	16S nucleotide within 4A of 30S r-protein THX (chain U in 2WDK)
1286	A	rprotein	16S nucleotide within 4A of 30S r-protein THX (chain U in 2WDK)
1235	U	rprotein	16S nucleotide within 4A of 30S r-protein THX (chain U in 2WDK)
1269	A	rprotein	16S nucleotide within 4A of 30S r-protein THX (chain U in 2WDK)
1262	C	rprotein	16S nucleotide within 4A of 30S r-protein THX (chain U in 2WDK)
1244	C	rprotein	16S nucleotide within 4A of 30S r-protein THX (chain U in 2WDK)
1331	G	rprotein	16S nucleotide within 4A of 30S r-protein THX (chain U in 2WDK)
1304	G	rprotein	16S nucleotide within 4A of 30S r-protein THX (chain U in 2WDK)
1353	G	rprotein	16S nucleotide within 4A of 30S r-protein THX (chain U in 2WDK)
1327	C	rprotein	16S nucleotide within 4A of 30S r-protein THX (chain U in 2WDK)
1328	C	rprotein	16S nucleotide within 4A of 30S r-protein THX (chain U in 2WDK)
1270	C	rprotein	16S nucleotide within 4A of 30S r-protein THX (chain U in 2WDK)
1268	A	rprotein	16S nucleotide within 4A of 30S r-protein THX (chain U in 2WDK)
1245	A	rprotein	16S nucleotide within 4A of 30S r-protein THX (chain U in 2WDK)
1305	G	rprotein	16S nucleotide within 4A of 30S r-protein THX (chain U in 2WDK)
1364	U	rprotein	16S nucleotide within 4A of 30S r-protein THX (chain U in 2WDK)
1325	C	rprotein	16S nucleotide within 4A of 30S r-protein THX (chain U in 2WDK)
1267	C	rprotein	16S nucleotide within 4A of 30S r-protein THX (chain U in 2WDK)
1285	A	rprotein	16S nucleotide within 4A of 30S r-protein THX (chain U in 2WDK)
1354	C	rprotein	16S nucleotide within 4A of 30S r-protein THX (chain U in 2WDK)
1243	C	rprotein	16S nucleotide within 4A of 30S r-protein THX (chain U in 2WDK)
1352	C	rprotein	16S nucleotide within 4A of 30S r-protein THX (chain U in 2WDK)
1236	A	rprotein	16S nucleotide within 4A of 30S r-protein THX (chain U in 2WDK)
1242	C	rprotein	16S nucleotide within 4A of 30S r-protein THX (chain U in 2WDK)
1234	C	rprotein	16S nucleotide within 4A of 30S r-protein THX (chain U in 2WDK)
966	G	trna	16S nucleotide within 4A of P-SITE PHE-TRNA PHE (chain V in 2WDK)
790	A	trna	16S nucleotide within 4A of P-SITE PHE-TRNA PHE (chain V in 2WDK)
1231	G	trna	16S nucleotide within 4A of P-SITE PHE-TRNA PHE (chain V in 2WDK)
1340	A	trna	16S nucleotide within 4A of P-SITE PHE-TRNA PHE (chain V in 2WDK)
1338	G	trna	16S nucleotide within 4A of P-SITE PHE-TRNA PHE (chain V in 2WDK)
1229	A	trna	16S nucleotide within 4A of P-SITE PHE-TRNA PHE (chain V in 2WDK)
1230	C	trna	16S nucleotide within 4A of P-SITE PHE-TRNA PHE (chain V in 2WDK)
1400	C	trna	16S nucleotide within 4A of P-SITE PHE-TRNA PHE (chain V in 2WDK)
1339	A	trna	16S nucleotide within 4A of P-SITE PHE-TRNA PHE (chain V in 2WDK)
531	U	trna	16S nucleotide within 4A of A-SITE PHE-TRNA PHE (chain Y in 2WDK)
955	U	trna	16S nucleotide within 4A of A-SITE PHE-TRNA PHE (chain Y in 2WDK)
1492	A	trna	16S nucleotide within 4A of A-SITE PHE-TRNA PHE (chain Y in 2WDK)
518	C	trna	16S nucleotide within 4A of A-SITE PHE-TRNA PHE (chain Y in 2WDK)
1493	A	trna	16S nucleotide within 4A of A-SITE PHE-TRNA PHE (chain Y in 2WDK)
1054	C	trna	16S nucleotide within 4A of A-SITE PHE-TRNA PHE (chain Y in 2WDK)
530	G	trna	16S nucleotide within 4A of A-SITE PHE-TRNA PHE (chain Y in 2WDK)
695	A	trna	16S nucleotide within 4A of E-SITE TRNA PHE (chain W in 2WDK)
789	U	trna	16S nucleotide within 4A of E-SITE TRNA PHE (chain W in 2WDK)
1340	A	trna	16S nucleotide within 4A of E-SITE TRNA PHE (chain W in 2WDK)
693	G	trna	16S nucleotide within 4A of E-SITE TRNA PHE (chain W in 2WDK)
694	A	trna	16S nucleotide within 4A of E-SITE TRNA PHE (chain W in 2WDK)
1403	C	mrna	16S nucleotide within 4A of MRNA (chain X in 2WDK)
927	G	mrna	16S nucleotide within 4A of MRNA (chain X in 2WDK)
790	A	mrna	16S nucleotide within 4A of MRNA (chain X in 2WDK)
1492	A	mrna	16S nucleotide within 4A of MRNA (chain X in 2WDK)
1498	U	mrna	16S nucleotide within 4A of MRNA (chain X in 2WDK)
1506	U	mrna	16S nucleotide within 4A of MRNA (chain X in 2WDK)
1493	A	mrna	16S nucleotide within 4A of MRNA (chain X in 2WDK)
1503	A	mrna	16S nucleotide within 4A of MRNA (chain X in 2WDK)
1397	C	mrna	16S nucleotide within 4A of MRNA (chain X in 2WDK)
1402	C	mrna	16S nucleotide within 4A of MRNA (chain X in 2WDK)
530	G	mrna	16S nucleotide within 4A of MRNA (chain X in 2WDK)
1401	G	mrna	16S nucleotide within 4A of MRNA (chain X in 2WDK)
1400	C	mrna	16S nucleotide within 4A of MRNA (chain X in 2WDK)
1505	G	mrna	16S nucleotide within 4A of MRNA (chain X in 2WDK)
926	G	mrna	16S nucleotide within 4A of MRNA (chain X in 2WDK)

## Sheet: S2B. 23S functional sites
Supplementary Table S2B. Functional nucleotides in 16S rRNA
resi	nt	label	description
2251	-	ptc	canonical nucleotides of the 23S peptidyl-transferase center [1]
2252	-	ptc	canonical nucleotides of the 23S peptidyl-transferase center [1]
2450	-	ptc	canonical nucleotides of the 23S peptidyl-transferase center [1]
2583	-	ptc	canonical nucleotides of the 23S peptidyl-transferase center [1]
2553	-	ptc	canonical nucleotides of the 23S peptidyl-transferase center [1]
2584	-	ptc	canonical nucleotides of the 23S peptidyl-transferase center [1]
2451	-	ptc	canonical nucleotides of the 23S peptidyl-transferase center [1]
2063	-	ptc	canonical nucleotides of the 23S peptidyl-transferase center [1]
2062	-	ptc	canonical nucleotides of the 23S peptidyl-transferase center [1]
1672	-	ptc	23S nucleotides within 4A of canonical PTC
2061	-	ptc	23S nucleotides within 4A of canonical PTC
2064	-	ptc	23S nucleotides within 4A of canonical PTC
2065	-	ptc	23S nucleotides within 4A of canonical PTC
2066	-	ptc	23S nucleotides within 4A of canonical PTC
2249	-	ptc	23S nucleotides within 4A of canonical PTC
2250	-	ptc	23S nucleotides within 4A of canonical PTC
2253	-	ptc	23S nucleotides within 4A of canonical PTC
2446	-	ptc	23S nucleotides within 4A of canonical PTC
2447	-	ptc	23S nucleotides within 4A of canonical PTC
2449	-	ptc	23S nucleotides within 4A of canonical PTC
2452	-	ptc	23S nucleotides within 4A of canonical PTC
2497	-	ptc	23S nucleotides within 4A of canonical PTC
2501	-	ptc	23S nucleotides within 4A of canonical PTC
2507	-	ptc	23S nucleotides within 4A of canonical PTC
2552	-	ptc	23S nucleotides within 4A of canonical PTC
2554	-	ptc	23S nucleotides within 4A of canonical PTC
2581	-	ptc	23S nucleotides within 4A of canonical PTC
2582	-	ptc	23S nucleotides within 4A of canonical PTC
2585	-	ptc	23S nucleotides within 4A of canonical PTC
2602	-	ptc	23S nucleotides within 4A of canonical PTC
2610	-	ptc	23S nucleotides within 4A of canonical PTC
2656	-	tf	23S nucleotides within 4A of ET-Tu in PDB 4V5G
2660	-	tf	23S nucleotides within 4A of ET-Tu in PDB 4V5G
2661	-	tf	23S nucleotides within 4A of ET-Tu in PDB 4V5G
1911	-	tf	23S nucleotides within 4A of RF1 in PDB 3MRZ/3MS0
1912	-	tf	23S nucleotides within 4A of RF1 in PDB 3MRZ/3MS0
1913	-	tf	23S nucleotides within 4A of RF1 in PDB 3MRZ/3MS0
1914	-	tf	23S nucleotides within 4A of RF1 in PDB 3MRZ/3MS0
1915	-	tf	23S nucleotides within 4A of RF1 in PDB 3MRZ/3MS0
1941	-	tf	23S nucleotides within 4A of RF1 in PDB 3MRZ/3MS0
1942	-	tf	23S nucleotides within 4A of RF1 in PDB 3MRZ/3MS0
1943	-	tf	23S nucleotides within 4A of RF1 in PDB 3MRZ/3MS0
2451	-	tf	23S nucleotides within 4A of RF1 in PDB 3MRZ/3MS0
2452	-	tf	23S nucleotides within 4A of RF1 in PDB 3MRZ/3MS0
2453	-	tf	23S nucleotides within 4A of RF1 in PDB 3MRZ/3MS0
2460	-	tf	23S nucleotides within 4A of RF1 in PDB 3MRZ/3MS0
2461	-	tf	23S nucleotides within 4A of RF1 in PDB 3MRZ/3MS0
2492	-	tf	23S nucleotides within 4A of RF1 in PDB 3MRZ/3MS0
2493	-	tf	23S nucleotides within 4A of RF1 in PDB 3MRZ/3MS0
2494	-	tf	23S nucleotides within 4A of RF1 in PDB 3MRZ/3MS0
2506	-	tf	23S nucleotides within 4A of RF1 in PDB 3MRZ/3MS0
2507	-	tf	23S nucleotides within 4A of RF1 in PDB 3MRZ/3MS0
2508	-	tf	23S nucleotides within 4A of RF1 in PDB 3MRZ/3MS0
2553	-	tf	23S nucleotides within 4A of RF1 in PDB 3MRZ/3MS0
2554	-	tf	23S nucleotides within 4A of RF1 in PDB 3MRZ/3MS0
2555	-	tf	23S nucleotides within 4A of RF1 in PDB 3MRZ/3MS0
2556	-	tf	23S nucleotides within 4A of RF1 in PDB 3MRZ/3MS0
2557	-	tf	23S nucleotides within 4A of RF1 in PDB 3MRZ/3MS0
2558	-	tf	23S nucleotides within 4A of RF1 in PDB 3MRZ/3MS0
2573	-	tf	23S nucleotides within 4A of RF1 in PDB 3MRZ/3MS0
2583	-	tf	23S nucleotides within 4A of RF1 in PDB 3MRZ/3MS0
2584	-	tf	23S nucleotides within 4A of RF1 in PDB 3MRZ/3MS0
2585	-	tf	23S nucleotides within 4A of RF1 in PDB 3MRZ/3MS0
2602	-	tf	23S nucleotides within 4A of RF1 in PDB 3MRZ/3MS0
2604	-	tf	23S nucleotides within 4A of RF1 in PDB 3MRZ/3MS0
2903	-	tf	23S nucleotides within 4A of RF1 in PDB 3MRZ/3MS0
2653	-	tf	23S nucleotides within 4A of RF3 in PDB 3ZVO/3ZVP
2654	-	tf	23S nucleotides within 4A of RF3 in PDB 3ZVO/3ZVP
2655	-	tf	23S nucleotides within 4A of RF3 in PDB 3ZVO/3ZVP
2656	-	tf	23S nucleotides within 4A of RF3 in PDB 3ZVO/3ZVP
2661	-	tf	23S nucleotides within 4A of RF3 in PDB 3ZVO/3ZVP
2662	-	tf	23S nucleotides within 4A of RF3 in PDB 3ZVO/3ZVP
745	-	mod	modified nucleotides [2]
746	-	mod	modified nucleotides [2]
747	-	mod	modified nucleotides [2]
955	-	mod	modified nucleotides [2]
1618	-	mod	modified nucleotides [2]
1835	-	mod	modified nucleotides [2]
1911	-	mod	modified nucleotides [2]
1915	-	mod	modified nucleotides [2]
1917	-	mod	modified nucleotides [2]
1939	-	mod	modified nucleotides [2]
1962	-	mod	modified nucleotides [2]
2030	-	mod	modified nucleotides [2]
2069	-	mod	modified nucleotides [2]
2251	-	mod	modified nucleotides [2]
2445	-	mod	modified nucleotides [2]
2449	-	mod	modified nucleotides [2]
2457	-	mod	modified nucleotides [2]
2498	-	mod	modified nucleotides [2]
2503	-	mod	modified nucleotides [2]
2504	-	mod	modified nucleotides [2]
2552	-	mod	modified nucleotides [2]
2580	-	mod	modified nucleotides [2]
2605	-	mod	modified nucleotides [2]
887	A	bridge	23S nucleotide in bridge B1a [5]
888	C	bridge	23S nucleotide in bridge B1a [5]
1919	A	bridge	23S nucleotide in bridge B2a [5]
1912	A	bridge	23S nucleotide in bridge B2a [5]
1916	A	bridge	23S nucleotide in bridge B2a [5]
1914	C	bridge	23S nucleotide in bridge B2a [5]
1915	U	bridge	23S nucleotide in bridge B2a [5]
1920	C	bridge	23S nucleotide in bridge B2a [5]
1919	A	bridge	23S nucleotide in bridge B2a [5]
1912	A	bridge	23S nucleotide in bridge B2a [5]
1913	A	bridge	23S nucleotide in bridge B2a [5]
1836	C	bridge	23S nucleotide in bridge B2b [5]
1832	C	bridge	23S nucleotide in bridge B2c [5]
1833	C	bridge	23S nucleotide in bridge B2c [5]
1947	C	bridge	23S nucleotide in bridge B3 [5]
1959	G	bridge	23S nucleotide in bridge B3 [5]
1960	A	bridge	23S nucleotide in bridge B3 [5]
1948	G	bridge	23S nucleotide in bridge B3 [5]
1958	C	bridge	23S nucleotide in bridge B3 [5]
1949	G	bridge	23S nucleotide in bridge B3 [5]
1950	G	bridge	23S nucleotide in bridge B3 [5]
1951	U	bridge	23S nucleotide in bridge B3 [5]
715	G	bridge	23S nucleotide in bridge B4 [5]
716	A	bridge	23S nucleotide in bridge B4 [5]
1703	G	bridge	23S nucleotide in bridge B5 [5]
1704	G	bridge	23S nucleotide in bridge B5 [5]
1689	A	bridge	23S nucleotide in bridge B5 [5]
1700	A	bridge	23S nucleotide in bridge B5 [5]
2864	C	bridge	23S nucleotide in bridge B6 [5]
1848	A	bridge	23S nucleotide in bridge B7a [5]
1846	G	bridge	23S nucleotide in bridge B7a [5]
1894	C	bridge	23S nucleotide in bridge B7a [5]
1846	G	bridge	23S nucleotide in bridge B7aR [5]
1847	A	bridge	23S nucleotide in bridge B7aR [5]
2115	G	bridge	23S nucleotide in bridge NewR [5]
1068	-	let	23S position known to present deleterious mutations [2]
1099	-	let	23S position known to present deleterious mutations [2]
1137	-	let	23S position known to present deleterious mutations [2]
1137	-	let	23S position known to present deleterious mutations [2]
1138	-	let	23S position known to present deleterious mutations [2]
1138	-	let	23S position known to present deleterious mutations [2]
1262	-	let	23S position known to present deleterious mutations [2]
1262	-	let	23S position known to present deleterious mutations [2]
2251	-	let	23S position known to present deleterious mutations [2]
2251	-	let	23S position known to present deleterious mutations [2]
2251	-	let	23S position known to present deleterious mutations [2]
2251	-	let	23S position known to present deleterious mutations [2]
2251	-	let	23S position known to present deleterious mutations [2]
2251	-	let	23S position known to present deleterious mutations [2]
2252	-	let	23S position known to present deleterious mutations [2]
2252	-	let	23S position known to present deleterious mutations [2]
2504	-	let	23S position known to present deleterious mutations [2]
2504	-	let	23S position known to present deleterious mutations [2]
2506	-	let	23S position known to present deleterious mutations [2]
2507	-	let	23S position known to present deleterious mutations [2]
2507	-	let	23S position known to present deleterious mutations [2]
2507	-	let	23S position known to present deleterious mutations [2]
2555	-	let	23S position known to present deleterious mutations [2]
2555	-	let	23S position known to present deleterious mutations [2]
2580	-	let	23S position known to present deleterious mutations [2]
2581	-	let	23S position known to present deleterious mutations [2]
2581	-	let	23S position known to present deleterious mutations [2]
2583	-	let	23S position known to present deleterious mutations [2]
2584	-	let	23S position known to present deleterious mutations [2]
2585	-	let	23S position known to present deleterious mutations [2]
2585	-	let	23S position known to present deleterious mutations [2]
2585	-	let	23S position known to present deleterious mutations [2]
2665	-	let	23S position known to present deleterious mutations [2]
2665	-	let	23S position known to present deleterious mutations [2]
2665	-	let	23S position known to present deleterious mutations [2]
1075	-	ben	23S position known to present benign mutations [2]
1076	-	ben	23S position known to present benign mutations [2]
1079	-	ben	23S position known to present benign mutations [2]
1109	-	ben	23S position known to present benign mutations [2]
1115	-	ben	23S position known to present benign mutations [2]
1914	-	ben	23S position known to present benign mutations [2]
1921	-	ben	23S position known to present benign mutations [2]
2032	-	ben	23S position known to present benign mutations [2]
2032	-	ben	23S position known to present benign mutations [2]
2032	-	ben	23S position known to present benign mutations [2]
2252	-	ben	23S position known to present benign mutations [2]
2252	-	ben	23S position known to present benign mutations [2]
2253	-	ben	23S position known to present benign mutations [2]
2253	-	ben	23S position known to present benign mutations [2]
2477	-	ben	23S position known to present benign mutations [2]
2477	-	ben	23S position known to present benign mutations [2]
2505	-	ben	23S position known to present benign mutations [2]
2555	-	ben	23S position known to present benign mutations [2]
2654	-	ben	23S position known to present benign mutations [2]
2654	-	ben	23S position known to present benign mutations [2]
2666	-	ben	23S position known to present benign mutations [2]
2666	-	ben	23S position known to present benign mutations [2]
2666	-	ben	23S position known to present benign mutations [2]
2666	-	ben	23S position known to present benign mutations [2]
836	-	antibiotic	23S nucleotide within 4A of antibiotic listed in [4]
838	-	antibiotic	23S nucleotide within 4A of antibiotic listed in [4]
839	-	antibiotic	23S nucleotide within 4A of antibiotic listed in [4]
840	-	antibiotic	23S nucleotide within 4A of antibiotic listed in [4]
841	-	antibiotic	23S nucleotide within 4A of antibiotic listed in [4]
844	-	antibiotic	23S nucleotide within 4A of antibiotic listed in [4]
1837	-	antibiotic	23S nucleotide within 4A of antibiotic listed in [4]
2098	-	antibiotic	23S nucleotide within 4A of antibiotic listed in [4]
2099	-	antibiotic	23S nucleotide within 4A of antibiotic listed in [4]
2100	-	antibiotic	23S nucleotide within 4A of antibiotic listed in [4]
2101	-	antibiotic	23S nucleotide within 4A of antibiotic listed in [4]
2102	-	antibiotic	23S nucleotide within 4A of antibiotic listed in [4]
2103	-	antibiotic	23S nucleotide within 4A of antibiotic listed in [4]
2104	-	antibiotic	23S nucleotide within 4A of antibiotic listed in [4]
2105	-	antibiotic	23S nucleotide within 4A of antibiotic listed in [4]
2397	-	antibiotic	23S nucleotide within 4A of antibiotic listed in [4]
2429	-	antibiotic	23S nucleotide within 4A of antibiotic listed in [4]
2430	-	antibiotic	23S nucleotide within 4A of antibiotic listed in [4]
2431	-	antibiotic	23S nucleotide within 4A of antibiotic listed in [4]
2432	-	antibiotic	23S nucleotide within 4A of antibiotic listed in [4]
2433	-	antibiotic	23S nucleotide within 4A of antibiotic listed in [4]
2434	-	antibiotic	23S nucleotide within 4A of antibiotic listed in [4]
2459	-	antibiotic	23S nucleotide within 4A of antibiotic listed in [4]
2460	-	antibiotic	23S nucleotide within 4A of antibiotic listed in [4]
2465	-	antibiotic	23S nucleotide within 4A of antibiotic listed in [4]
2466	-	antibiotic	23S nucleotide within 4A of antibiotic listed in [4]
2468	-	antibiotic	23S nucleotide within 4A of antibiotic listed in [4]
2474	-	antibiotic	23S nucleotide within 4A of antibiotic listed in [4]
2477	-	antibiotic	23S nucleotide within 4A of antibiotic listed in [4]
2478	-	antibiotic	23S nucleotide within 4A of antibiotic listed in [4]
2479	-	antibiotic	23S nucleotide within 4A of antibiotic listed in [4]
2482	-	antibiotic	23S nucleotide within 4A of antibiotic listed in [4]
2485	-	antibiotic	23S nucleotide within 4A of antibiotic listed in [4]
2486	-	antibiotic	23S nucleotide within 4A of antibiotic listed in [4]
2487	-	antibiotic	23S nucleotide within 4A of antibiotic listed in [4]
2488	-	antibiotic	23S nucleotide within 4A of antibiotic listed in [4]
2489	-	antibiotic	23S nucleotide within 4A of antibiotic listed in [4]
2534	-	antibiotic	23S nucleotide within 4A of antibiotic listed in [4]
2535	-	antibiotic	23S nucleotide within 4A of antibiotic listed in [4]
2536	-	antibiotic	23S nucleotide within 4A of antibiotic listed in [4]
2537	-	antibiotic	23S nucleotide within 4A of antibiotic listed in [4]
2538	-	antibiotic	23S nucleotide within 4A of antibiotic listed in [4]
2539	-	antibiotic	23S nucleotide within 4A of antibiotic listed in [4]
2540	-	antibiotic	23S nucleotide within 4A of antibiotic listed in [4]
2541	-	antibiotic	23S nucleotide within 4A of antibiotic listed in [4]
2611	-	antibiotic	23S nucleotide within 4A of antibiotic listed in [4]
2612	-	antibiotic	23S nucleotide within 4A of antibiotic listed in [4]
2613	-	antibiotic	23S nucleotide within 4A of antibiotic listed in [4]
2614	-	antibiotic	23S nucleotide within 4A of antibiotic listed in [4]
2615	-	antibiotic	23S nucleotide within 4A of antibiotic listed in [4]
2616	-	antibiotic	23S nucleotide within 4A of antibiotic listed in [4]
2618	-	antibiotic	23S nucleotide within 4A of antibiotic listed in [4]
2619	-	antibiotic	23S nucleotide within 4A of antibiotic listed in [4]
2620	-	antibiotic	23S nucleotide within 4A of antibiotic listed in [4]
2621	-	antibiotic	23S nucleotide within 4A of antibiotic listed in [4]
2636	-	antibiotic	23S nucleotide within 4A of antibiotic listed in [4]
2637	-	antibiotic	23S nucleotide within 4A of antibiotic listed in [4]
2644	-	antibiotic	23S nucleotide within 4A of antibiotic listed in [4]
2645	-	antibiotic	23S nucleotide within 4A of antibiotic listed in [4]
2647	-	antibiotic	23S nucleotide within 4A of antibiotic listed in [4]
2648	-	antibiotic	23S nucleotide within 4A of antibiotic listed in [4]
918	A	rprotein	23S nucleotide within 4A of 30S r-protein S2 (chain B in 2WDL)
917	A	rprotein	23S nucleotide within 4A of 30S r-protein S2 (chain B in 2WDL)
861	A	rprotein	23S nucleotide within 4A of 30S r-protein S2 (chain B in 2WDL)
1026	U	rprotein	23S nucleotide within 4A of 30S r-protein S2 (chain B in 2WDL)
916	G	rprotein	23S nucleotide within 4A of 30S r-protein S2 (chain B in 2WDL)
958	U	rprotein	23S nucleotide within 4A of 30S r-protein S2 (chain B in 2WDL)
864	G	rprotein	23S nucleotide within 4A of 30S r-protein S2 (chain B in 2WDL)
1027	A	rprotein	23S nucleotide within 4A of 30S r-protein S2 (chain B in 2WDL)
1028	A	rprotein	23S nucleotide within 4A of 30S r-protein S2 (chain B in 2WDL)
915	C	rprotein	23S nucleotide within 4A of 30S r-protein S2 (chain B in 2WDL)
863	A	rprotein	23S nucleotide within 4A of 30S r-protein S2 (chain B in 2WDL)
862	G	rprotein	23S nucleotide within 4A of 30S r-protein S2 (chain B in 2WDL)
919	G	rprotein	23S nucleotide within 4A of 30S r-protein S2 (chain B in 2WDL)
1861	G	rprotein	23S nucleotide within 4A of 30S r-protein S3 (chain C in 2WDL)
2123	G	rprotein	23S nucleotide within 4A of 30S r-protein S3 (chain C in 2WDL)
1860	G	rprotein	23S nucleotide within 4A of 30S r-protein S3 (chain C in 2WDL)
2125	G	rprotein	23S nucleotide within 4A of 30S r-protein S3 (chain C in 2WDL)
2127	G	rprotein	23S nucleotide within 4A of 30S r-protein S3 (chain C in 2WDL)
2124	G	rprotein	23S nucleotide within 4A of 30S r-protein S3 (chain C in 2WDL)
2170	A	rprotein	23S nucleotide within 4A of 30S r-protein S3 (chain C in 2WDL)
2122	U	rprotein	23S nucleotide within 4A of 30S r-protein S3 (chain C in 2WDL)
2128	C	rprotein	23S nucleotide within 4A of 30S r-protein S3 (chain C in 2WDL)
2169	A	rprotein	23S nucleotide within 4A of 30S r-protein S3 (chain C in 2WDL)
2121	G	rprotein	23S nucleotide within 4A of 30S r-protein S3 (chain C in 2WDL)
2178	C	rprotein	23S nucleotide within 4A of 30S r-protein S3 (chain C in 2WDL)
2120	G	rprotein	23S nucleotide within 4A of 30S r-protein S3 (chain C in 2WDL)
2175	C	rprotein	23S nucleotide within 4A of 30S r-protein S3 (chain C in 2WDL)
2179	C	rprotein	23S nucleotide within 4A of 30S r-protein S3 (chain C in 2WDL)
2176	A	rprotein	23S nucleotide within 4A of 30S r-protein S3 (chain C in 2WDL)
2177	C	rprotein	23S nucleotide within 4A of 30S r-protein S3 (chain C in 2WDL)
1774	C	rprotein	23S nucleotide within 4A of 30S r-protein S4 (chain D in 2WDL)
783	A	rprotein	23S nucleotide within 4A of 30S r-protein S4 (chain D in 2WDL)
780	G	rprotein	23S nucleotide within 4A of 30S r-protein S4 (chain D in 2WDL)
727	A	rprotein	23S nucleotide within 4A of 30S r-protein S4 (chain D in 2WDL)
1353	A	rprotein	23S nucleotide within 4A of 30S r-protein S4 (chain D in 2WDL)
1840	G	rprotein	23S nucleotide within 4A of 30S r-protein S4 (chain D in 2WDL)
1827	C	rprotein	23S nucleotide within 4A of 30S r-protein S4 (chain D in 2WDL)
690	G	rprotein	23S nucleotide within 4A of 30S r-protein S4 (chain D in 2WDL)
1798	U	rprotein	23S nucleotide within 4A of 30S r-protein S4 (chain D in 2WDL)
1500	G	rprotein	23S nucleotide within 4A of 30S r-protein S4 (chain D in 2WDL)
1565	C	rprotein	23S nucleotide within 4A of 30S r-protein S4 (chain D in 2WDL)
1791	A	rprotein	23S nucleotide within 4A of 30S r-protein S4 (chain D in 2WDL)
1788	C	rprotein	23S nucleotide within 4A of 30S r-protein S4 (chain D in 2WDL)
1799	G	rprotein	23S nucleotide within 4A of 30S r-protein S4 (chain D in 2WDL)
2221	G	rprotein	23S nucleotide within 4A of 30S r-protein S4 (chain D in 2WDL)
2074	U	rprotein	23S nucleotide within 4A of 30S r-protein S4 (chain D in 2WDL)
1795	C	rprotein	23S nucleotide within 4A of 30S r-protein S4 (chain D in 2WDL)
1815	A	rprotein	23S nucleotide within 4A of 30S r-protein S4 (chain D in 2WDL)
2228	G	rprotein	23S nucleotide within 4A of 30S r-protein S4 (chain D in 2WDL)
705	A	rprotein	23S nucleotide within 4A of 30S r-protein S4 (chain D in 2WDL)
2206	G	rprotein	23S nucleotide within 4A of 30S r-protein S4 (chain D in 2WDL)
1823	G	rprotein	23S nucleotide within 4A of 30S r-protein S4 (chain D in 2WDL)
777	A	rprotein	23S nucleotide within 4A of 30S r-protein S4 (chain D in 2WDL)
1842	G	rprotein	23S nucleotide within 4A of 30S r-protein S4 (chain D in 2WDL)
728	G	rprotein	23S nucleotide within 4A of 30S r-protein S4 (chain D in 2WDL)
1693	U	rprotein	23S nucleotide within 4A of 30S r-protein S4 (chain D in 2WDL)
2085	C	rprotein	23S nucleotide within 4A of 30S r-protein S4 (chain D in 2WDL)
782	A	rprotein	23S nucleotide within 4A of 30S r-protein S4 (chain D in 2WDL)
2599	G	rprotein	23S nucleotide within 4A of 30S r-protein S4 (chain D in 2WDL)
1822	G	rprotein	23S nucleotide within 4A of 30S r-protein S4 (chain D in 2WDL)
1830	C	rprotein	23S nucleotide within 4A of 30S r-protein S4 (chain D in 2WDL)
1789	A	rprotein	23S nucleotide within 4A of 30S r-protein S4 (chain D in 2WDL)
2600	A	rprotein	23S nucleotide within 4A of 30S r-protein S4 (chain D in 2WDL)
729	G	rprotein	23S nucleotide within 4A of 30S r-protein S4 (chain D in 2WDL)
779	U	rprotein	23S nucleotide within 4A of 30S r-protein S4 (chain D in 2WDL)
1695	G	rprotein	23S nucleotide within 4A of 30S r-protein S4 (chain D in 2WDL)
1801	G	rprotein	23S nucleotide within 4A of 30S r-protein S4 (chain D in 2WDL)
1977	A	rprotein	23S nucleotide within 4A of 30S r-protein S4 (chain D in 2WDL)
1812	A	rprotein	23S nucleotide within 4A of 30S r-protein S4 (chain D in 2WDL)
2439	A	rprotein	23S nucleotide within 4A of 30S r-protein S4 (chain D in 2WDL)
2073	C	rprotein	23S nucleotide within 4A of 30S r-protein S4 (chain D in 2WDL)
2076	U	rprotein	23S nucleotide within 4A of 30S r-protein S4 (chain D in 2WDL)
2086	U	rprotein	23S nucleotide within 4A of 30S r-protein S4 (chain D in 2WDL)
1569	A	rprotein	23S nucleotide within 4A of 30S r-protein S4 (chain D in 2WDL)
778	G	rprotein	23S nucleotide within 4A of 30S r-protein S4 (chain D in 2WDL)
1490	A	rprotein	23S nucleotide within 4A of 30S r-protein S4 (chain D in 2WDL)
764	A	rprotein	23S nucleotide within 4A of 30S r-protein S4 (chain D in 2WDL)
781	A	rprotein	23S nucleotide within 4A of 30S r-protein S4 (chain D in 2WDL)
1568	G	rprotein	23S nucleotide within 4A of 30S r-protein S4 (chain D in 2WDL)
1804	C	rprotein	23S nucleotide within 4A of 30S r-protein S4 (chain D in 2WDL)
1814	G	rprotein	23S nucleotide within 4A of 30S r-protein S4 (chain D in 2WDL)
1845	G	rprotein	23S nucleotide within 4A of 30S r-protein S4 (chain D in 2WDL)
706	A	rprotein	23S nucleotide within 4A of 30S r-protein S4 (chain D in 2WDL)
793	A	rprotein	23S nucleotide within 4A of 30S r-protein S4 (chain D in 2WDL)
1570	A	rprotein	23S nucleotide within 4A of 30S r-protein S4 (chain D in 2WDL)
1818	U	rprotein	23S nucleotide within 4A of 30S r-protein S4 (chain D in 2WDL)
1566	A	rprotein	23S nucleotide within 4A of 30S r-protein S4 (chain D in 2WDL)
1354	A	rprotein	23S nucleotide within 4A of 30S r-protein S4 (chain D in 2WDL)
1790	C	rprotein	23S nucleotide within 4A of 30S r-protein S4 (chain D in 2WDL)
2203	U	rprotein	23S nucleotide within 4A of 30S r-protein S4 (chain D in 2WDL)
2222	G	rprotein	23S nucleotide within 4A of 30S r-protein S4 (chain D in 2WDL)
1370	C	rprotein	23S nucleotide within 4A of 30S r-protein S4 (chain D in 2WDL)
774	A	rprotein	23S nucleotide within 4A of 30S r-protein S4 (chain D in 2WDL)
2226	C	rprotein	23S nucleotide within 4A of 30S r-protein S4 (chain D in 2WDL)
1694	C	rprotein	23S nucleotide within 4A of 30S r-protein S4 (chain D in 2WDL)
1825	A	rprotein	23S nucleotide within 4A of 30S r-protein S4 (chain D in 2WDL)
1773	A	rprotein	23S nucleotide within 4A of 30S r-protein S4 (chain D in 2WDL)
2223	G	rprotein	23S nucleotide within 4A of 30S r-protein S4 (chain D in 2WDL)
2440	C	rprotein	23S nucleotide within 4A of 30S r-protein S4 (chain D in 2WDL)
1800	C	rprotein	23S nucleotide within 4A of 30S r-protein S4 (chain D in 2WDL)
1803	A	rprotein	23S nucleotide within 4A of 30S r-protein S4 (chain D in 2WDL)
1806	C	rprotein	23S nucleotide within 4A of 30S r-protein S4 (chain D in 2WDL)
2205	C	rprotein	23S nucleotide within 4A of 30S r-protein S4 (chain D in 2WDL)
2590	A	rprotein	23S nucleotide within 4A of 30S r-protein S4 (chain D in 2WDL)
1811	G	rprotein	23S nucleotide within 4A of 30S r-protein S4 (chain D in 2WDL)
2224	G	rprotein	23S nucleotide within 4A of 30S r-protein S4 (chain D in 2WDL)
1787	A	rprotein	23S nucleotide within 4A of 30S r-protein S4 (chain D in 2WDL)
1805	U	rprotein	23S nucleotide within 4A of 30S r-protein S4 (chain D in 2WDL)
773	U	rprotein	23S nucleotide within 4A of 30S r-protein S4 (chain D in 2WDL)
2597	G	rprotein	23S nucleotide within 4A of 30S r-protein S4 (chain D in 2WDL)
1901	A	rprotein	23S nucleotide within 4A of 30S r-protein S4 (chain D in 2WDL)
2227	A	rprotein	23S nucleotide within 4A of 30S r-protein S4 (chain D in 2WDL)
1844	C	rprotein	23S nucleotide within 4A of 30S r-protein S4 (chain D in 2WDL)
1821	A	rprotein	23S nucleotide within 4A of 30S r-protein S4 (chain D in 2WDL)
2596	U	rprotein	23S nucleotide within 4A of 30S r-protein S4 (chain D in 2WDL)
2239	G	rprotein	23S nucleotide within 4A of 30S r-protein S4 (chain D in 2WDL)
1817	G	rprotein	23S nucleotide within 4A of 30S r-protein S4 (chain D in 2WDL)
2202	C	rprotein	23S nucleotide within 4A of 30S r-protein S4 (chain D in 2WDL)
1567	A	rprotein	23S nucleotide within 4A of 30S r-protein S4 (chain D in 2WDL)
1826	G	rprotein	23S nucleotide within 4A of 30S r-protein S4 (chain D in 2WDL)
1903	G	rprotein	23S nucleotide within 4A of 30S r-protein S4 (chain D in 2WDL)
1797	C	rprotein	23S nucleotide within 4A of 30S r-protein S4 (chain D in 2WDL)
691	C	rprotein	23S nucleotide within 4A of 30S r-protein S4 (chain D in 2WDL)
1816	G	rprotein	23S nucleotide within 4A of 30S r-protein S4 (chain D in 2WDL)
1491	G	rprotein	23S nucleotide within 4A of 30S r-protein S4 (chain D in 2WDL)
1828	G	rprotein	23S nucleotide within 4A of 30S r-protein S4 (chain D in 2WDL)
1501	C	rprotein	23S nucleotide within 4A of 30S r-protein S4 (chain D in 2WDL)
1971	A	rprotein	23S nucleotide within 4A of 30S r-protein S4 (chain D in 2WDL)
1796	U	rprotein	23S nucleotide within 4A of 30S r-protein S4 (chain D in 2WDL)
2591	C	rprotein	23S nucleotide within 4A of 30S r-protein S4 (chain D in 2WDL)
1829	A	rprotein	23S nucleotide within 4A of 30S r-protein S4 (chain D in 2WDL)
1972	A	rprotein	23S nucleotide within 4A of 30S r-protein S4 (chain D in 2WDL)
694	U	rprotein	23S nucleotide within 4A of 30S r-protein S4 (chain D in 2WDL)
1820	U	rprotein	23S nucleotide within 4A of 30S r-protein S4 (chain D in 2WDL)
1792	G	rprotein	23S nucleotide within 4A of 30S r-protein S4 (chain D in 2WDL)
692	C	rprotein	23S nucleotide within 4A of 30S r-protein S4 (chain D in 2WDL)
1819	A	rprotein	23S nucleotide within 4A of 30S r-protein S4 (chain D in 2WDL)
784	A	rprotein	23S nucleotide within 4A of 30S r-protein S4 (chain D in 2WDL)
1843	C	rprotein	23S nucleotide within 4A of 30S r-protein S4 (chain D in 2WDL)
1775	U	rprotein	23S nucleotide within 4A of 30S r-protein S4 (chain D in 2WDL)
1813	G	rprotein	23S nucleotide within 4A of 30S r-protein S4 (chain D in 2WDL)
2598	A	rprotein	23S nucleotide within 4A of 30S r-protein S4 (chain D in 2WDL)
1502	C	rprotein	23S nucleotide within 4A of 30S r-protein S4 (chain D in 2WDL)
1902	C	rprotein	23S nucleotide within 4A of 30S r-protein S4 (chain D in 2WDL)
1824	G	rprotein	23S nucleotide within 4A of 30S r-protein S4 (chain D in 2WDL)
1654	A	rprotein	23S nucleotide within 4A of 30S r-protein S5 (chain E in 2WDL)
2572	A	rprotein	23S nucleotide within 4A of 30S r-protein S5 (chain E in 2WDL)
2728	U	rprotein	23S nucleotide within 4A of 30S r-protein S5 (chain E in 2WDL)
2512	C	rprotein	23S nucleotide within 4A of 30S r-protein S5 (chain E in 2WDL)
2730	C	rprotein	23S nucleotide within 4A of 30S r-protein S5 (chain E in 2WDL)
2024	G	rprotein	23S nucleotide within 4A of 30S r-protein S5 (chain E in 2WDL)
1658	C	rprotein	23S nucleotide within 4A of 30S r-protein S5 (chain E in 2WDL)
2771	C	rprotein	23S nucleotide within 4A of 30S r-protein S5 (chain E in 2WDL)
2574	G	rprotein	23S nucleotide within 4A of 30S r-protein S5 (chain E in 2WDL)
2618	G	rprotein	23S nucleotide within 4A of 30S r-protein S5 (chain E in 2WDL)
2679	A	rprotein	23S nucleotide within 4A of 30S r-protein S5 (chain E in 2WDL)
2579	C	rprotein	23S nucleotide within 4A of 30S r-protein S5 (chain E in 2WDL)
1671	U	rprotein	23S nucleotide within 4A of 30S r-protein S5 (chain E in 2WDL)
2729	G	rprotein	23S nucleotide within 4A of 30S r-protein S5 (chain E in 2WDL)
2506	U	rprotein	23S nucleotide within 4A of 30S r-protein S5 (chain E in 2WDL)
1675	C	rprotein	23S nucleotide within 4A of 30S r-protein S5 (chain E in 2WDL)
2785	C	rprotein	23S nucleotide within 4A of 30S r-protein S5 (chain E in 2WDL)
2831	G	rprotein	23S nucleotide within 4A of 30S r-protein S5 (chain E in 2WDL)
2774	C	rprotein	23S nucleotide within 4A of 30S r-protein S5 (chain E in 2WDL)
1999	C	rprotein	23S nucleotide within 4A of 30S r-protein S5 (chain E in 2WDL)
2032	G	rprotein	23S nucleotide within 4A of 30S r-protein S5 (chain E in 2WDL)
2784	C	rprotein	23S nucleotide within 4A of 30S r-protein S5 (chain E in 2WDL)
2830	G	rprotein	23S nucleotide within 4A of 30S r-protein S5 (chain E in 2WDL)
2581	G	rprotein	23S nucleotide within 4A of 30S r-protein S5 (chain E in 2WDL)
2621	A	rprotein	23S nucleotide within 4A of 30S r-protein S5 (chain E in 2WDL)
2786	U	rprotein	23S nucleotide within 4A of 30S r-protein S5 (chain E in 2WDL)
2633	G	rprotein	23S nucleotide within 4A of 30S r-protein S5 (chain E in 2WDL)
1670	C	rprotein	23S nucleotide within 4A of 30S r-protein S5 (chain E in 2WDL)
2678	C	rprotein	23S nucleotide within 4A of 30S r-protein S5 (chain E in 2WDL)
1655	A	rprotein	23S nucleotide within 4A of 30S r-protein S5 (chain E in 2WDL)
2822	G	rprotein	23S nucleotide within 4A of 30S r-protein S5 (chain E in 2WDL)
2580	U	rprotein	23S nucleotide within 4A of 30S r-protein S5 (chain E in 2WDL)
2513	G	rprotein	23S nucleotide within 4A of 30S r-protein S5 (chain E in 2WDL)
2051	A	rprotein	23S nucleotide within 4A of 30S r-protein S5 (chain E in 2WDL)
574	C	rprotein	23S nucleotide within 4A of 30S r-protein S5 (chain E in 2WDL)
745	G	rprotein	23S nucleotide within 4A of 30S r-protein S5 (chain E in 2WDL)
2772	C	rprotein	23S nucleotide within 4A of 30S r-protein S5 (chain E in 2WDL)
2731	G	rprotein	23S nucleotide within 4A of 30S r-protein S5 (chain E in 2WDL)
2636	U	rprotein	23S nucleotide within 4A of 30S r-protein S5 (chain E in 2WDL)
2811	G	rprotein	23S nucleotide within 4A of 30S r-protein S5 (chain E in 2WDL)
1997	G	rprotein	23S nucleotide within 4A of 30S r-protein S5 (chain E in 2WDL)
2632	A	rprotein	23S nucleotide within 4A of 30S r-protein S5 (chain E in 2WDL)
2631	G	rprotein	23S nucleotide within 4A of 30S r-protein S5 (chain E in 2WDL)
2048	G	rprotein	23S nucleotide within 4A of 30S r-protein S5 (chain E in 2WDL)
2823	A	rprotein	23S nucleotide within 4A of 30S r-protein S5 (chain E in 2WDL)
2622	C	rprotein	23S nucleotide within 4A of 30S r-protein S5 (chain E in 2WDL)
2514	U	rprotein	23S nucleotide within 4A of 30S r-protein S5 (chain E in 2WDL)
2050	C	rprotein	23S nucleotide within 4A of 30S r-protein S5 (chain E in 2WDL)
2635	C	rprotein	23S nucleotide within 4A of 30S r-protein S5 (chain E in 2WDL)
2511	U	rprotein	23S nucleotide within 4A of 30S r-protein S5 (chain E in 2WDL)
1656	C	rprotein	23S nucleotide within 4A of 30S r-protein S5 (chain E in 2WDL)
2049	G	rprotein	23S nucleotide within 4A of 30S r-protein S5 (chain E in 2WDL)
2052	G	rprotein	23S nucleotide within 4A of 30S r-protein S5 (chain E in 2WDL)
2787	C	rprotein	23S nucleotide within 4A of 30S r-protein S5 (chain E in 2WDL)
1994	C	rprotein	23S nucleotide within 4A of 30S r-protein S5 (chain E in 2WDL)
2053	G	rprotein	23S nucleotide within 4A of 30S r-protein S5 (chain E in 2WDL)
2682	U	rprotein	23S nucleotide within 4A of 30S r-protein S5 (chain E in 2WDL)
1657	C	rprotein	23S nucleotide within 4A of 30S r-protein S5 (chain E in 2WDL)
2820	A	rprotein	23S nucleotide within 4A of 30S r-protein S5 (chain E in 2WDL)
2055	C	rprotein	23S nucleotide within 4A of 30S r-protein S5 (chain E in 2WDL)
1659	U	rprotein	23S nucleotide within 4A of 30S r-protein S5 (chain E in 2WDL)
2724	C	rprotein	23S nucleotide within 4A of 30S r-protein S5 (chain E in 2WDL)
2683	C	rprotein	23S nucleotide within 4A of 30S r-protein S5 (chain E in 2WDL)
2571	C	rprotein	23S nucleotide within 4A of 30S r-protein S5 (chain E in 2WDL)
1993	U	rprotein	23S nucleotide within 4A of 30S r-protein S5 (chain E in 2WDL)
2680	C	rprotein	23S nucleotide within 4A of 30S r-protein S5 (chain E in 2WDL)
2054	A	rprotein	23S nucleotide within 4A of 30S r-protein S5 (chain E in 2WDL)
2619	C	rprotein	23S nucleotide within 4A of 30S r-protein S5 (chain E in 2WDL)
2634	G	rprotein	23S nucleotide within 4A of 30S r-protein S5 (chain E in 2WDL)
2733	A	rprotein	23S nucleotide within 4A of 30S r-protein S5 (chain E in 2WDL)
744	G	rprotein	23S nucleotide within 4A of 30S r-protein S5 (chain E in 2WDL)
2578	G	rprotein	23S nucleotide within 4A of 30S r-protein S5 (chain E in 2WDL)
2575	C	rprotein	23S nucleotide within 4A of 30S r-protein S5 (chain E in 2WDL)
2681	C	rprotein	23S nucleotide within 4A of 30S r-protein S5 (chain E in 2WDL)
2637	U	rprotein	23S nucleotide within 4A of 30S r-protein S5 (chain E in 2WDL)
2810	A	rprotein	23S nucleotide within 4A of 30S r-protein S5 (chain E in 2WDL)
2620	C	rprotein	23S nucleotide within 4A of 30S r-protein S5 (chain E in 2WDL)
2638	G	rprotein	23S nucleotide within 4A of 30S r-protein S5 (chain E in 2WDL)
2773	C	rprotein	23S nucleotide within 4A of 30S r-protein S5 (chain E in 2WDL)
2821	A	rprotein	23S nucleotide within 4A of 30S r-protein S5 (chain E in 2WDL)
2025	C	rprotein	23S nucleotide within 4A of 30S r-protein S5 (chain E in 2WDL)
1673	U	rprotein	23S nucleotide within 4A of 30S r-protein S5 (chain E in 2WDL)
2723	C	rprotein	23S nucleotide within 4A of 30S r-protein S5 (chain E in 2WDL)
2783	G	rprotein	23S nucleotide within 4A of 30S r-protein S5 (chain E in 2WDL)
1998	G	rprotein	23S nucleotide within 4A of 30S r-protein S5 (chain E in 2WDL)
1130	U	rprotein	23S nucleotide within 4A of 30S r-protein S5 (chain E in 2WDL)
743	G	rprotein	23S nucleotide within 4A of 30S r-protein S5 (chain E in 2WDL)
796	C	rprotein	23S nucleotide within 4A of 30S r-protein S6 (chain F in 2WDL)
1202	C	rprotein	23S nucleotide within 4A of 30S r-protein S6 (chain F in 2WDL)
323	G	rprotein	23S nucleotide within 4A of 30S r-protein S6 (chain F in 2WDL)
2444	G	rprotein	23S nucleotide within 4A of 30S r-protein S6 (chain F in 2WDL)
468	G	rprotein	23S nucleotide within 4A of 30S r-protein S6 (chain F in 2WDL)
589	C	rprotein	23S nucleotide within 4A of 30S r-protein S6 (chain F in 2WDL)
443	A	rprotein	23S nucleotide within 4A of 30S r-protein S6 (chain F in 2WDL)
1248	G	rprotein	23S nucleotide within 4A of 30S r-protein S6 (chain F in 2WDL)
607	U	rprotein	23S nucleotide within 4A of 30S r-protein S6 (chain F in 2WDL)
340	A	rprotein	23S nucleotide within 4A of 30S r-protein S6 (chain F in 2WDL)
1257	C	rprotein	23S nucleotide within 4A of 30S r-protein S6 (chain F in 2WDL)
1246	A	rprotein	23S nucleotide within 4A of 30S r-protein S6 (chain F in 2WDL)
1245	G	rprotein	23S nucleotide within 4A of 30S r-protein S6 (chain F in 2WDL)
601	C	rprotein	23S nucleotide within 4A of 30S r-protein S6 (chain F in 2WDL)
590	A	rprotein	23S nucleotide within 4A of 30S r-protein S6 (chain F in 2WDL)
451	C	rprotein	23S nucleotide within 4A of 30S r-protein S6 (chain F in 2WDL)
598	G	rprotein	23S nucleotide within 4A of 30S r-protein S6 (chain F in 2WDL)
2060	A	rprotein	23S nucleotide within 4A of 30S r-protein S6 (chain F in 2WDL)
587	C	rprotein	23S nucleotide within 4A of 30S r-protein S6 (chain F in 2WDL)
470	A	rprotein	23S nucleotide within 4A of 30S r-protein S6 (chain F in 2WDL)
675	A	rprotein	23S nucleotide within 4A of 30S r-protein S6 (chain F in 2WDL)
661	C	rprotein	23S nucleotide within 4A of 30S r-protein S6 (chain F in 2WDL)
676	A	rprotein	23S nucleotide within 4A of 30S r-protein S6 (chain F in 2WDL)
321	G	rprotein	23S nucleotide within 4A of 30S r-protein S6 (chain F in 2WDL)
38	A	rprotein	23S nucleotide within 4A of 30S r-protein S6 (chain F in 2WDL)
2443	C	rprotein	23S nucleotide within 4A of 30S r-protein S6 (chain F in 2WDL)
2445	G	rprotein	23S nucleotide within 4A of 30S r-protein S6 (chain F in 2WDL)
448	U	rprotein	23S nucleotide within 4A of 30S r-protein S6 (chain F in 2WDL)
616	G	rprotein	23S nucleotide within 4A of 30S r-protein S6 (chain F in 2WDL)
797	C	rprotein	23S nucleotide within 4A of 30S r-protein S6 (chain F in 2WDL)
660	G	rprotein	23S nucleotide within 4A of 30S r-protein S6 (chain F in 2WDL)
322	A	rprotein	23S nucleotide within 4A of 30S r-protein S6 (chain F in 2WDL)
673	C	rprotein	23S nucleotide within 4A of 30S r-protein S6 (chain F in 2WDL)
585	G	rprotein	23S nucleotide within 4A of 30S r-protein S6 (chain F in 2WDL)
618	C	rprotein	23S nucleotide within 4A of 30S r-protein S6 (chain F in 2WDL)
1244	G	rprotein	23S nucleotide within 4A of 30S r-protein S6 (chain F in 2WDL)
674	G	rprotein	23S nucleotide within 4A of 30S r-protein S6 (chain F in 2WDL)
801	G	rprotein	23S nucleotide within 4A of 30S r-protein S6 (chain F in 2WDL)
1255	U	rprotein	23S nucleotide within 4A of 30S r-protein S6 (chain F in 2WDL)
605	C	rprotein	23S nucleotide within 4A of 30S r-protein S6 (chain F in 2WDL)
608	A	rprotein	23S nucleotide within 4A of 30S r-protein S6 (chain F in 2WDL)
37	C	rprotein	23S nucleotide within 4A of 30S r-protein S6 (chain F in 2WDL)
1256	G	rprotein	23S nucleotide within 4A of 30S r-protein S6 (chain F in 2WDL)
586	A	rprotein	23S nucleotide within 4A of 30S r-protein S6 (chain F in 2WDL)
671	C	rprotein	23S nucleotide within 4A of 30S r-protein S6 (chain F in 2WDL)
619	G	rprotein	23S nucleotide within 4A of 30S r-protein S6 (chain F in 2WDL)
669	G	rprotein	23S nucleotide within 4A of 30S r-protein S6 (chain F in 2WDL)
600	G	rprotein	23S nucleotide within 4A of 30S r-protein S6 (chain F in 2WDL)
2061	G	rprotein	23S nucleotide within 4A of 30S r-protein S6 (chain F in 2WDL)
452	G	rprotein	23S nucleotide within 4A of 30S r-protein S6 (chain F in 2WDL)
1258	C	rprotein	23S nucleotide within 4A of 30S r-protein S6 (chain F in 2WDL)
798	G	rprotein	23S nucleotide within 4A of 30S r-protein S6 (chain F in 2WDL)
659	C	rprotein	23S nucleotide within 4A of 30S r-protein S6 (chain F in 2WDL)
39	C	rprotein	23S nucleotide within 4A of 30S r-protein S6 (chain F in 2WDL)
588	U	rprotein	23S nucleotide within 4A of 30S r-protein S6 (chain F in 2WDL)
672	C	rprotein	23S nucleotide within 4A of 30S r-protein S6 (chain F in 2WDL)
442	G	rprotein	23S nucleotide within 4A of 30S r-protein S6 (chain F in 2WDL)
790	C	rprotein	23S nucleotide within 4A of 30S r-protein S6 (chain F in 2WDL)
320	A	rprotein	23S nucleotide within 4A of 30S r-protein S6 (chain F in 2WDL)
658	C	rprotein	23S nucleotide within 4A of 30S r-protein S6 (chain F in 2WDL)
469	G	rprotein	23S nucleotide within 4A of 30S r-protein S6 (chain F in 2WDL)
444	C	rprotein	23S nucleotide within 4A of 30S r-protein S6 (chain F in 2WDL)
2059	A	rprotein	23S nucleotide within 4A of 30S r-protein S6 (chain F in 2WDL)
606	U	rprotein	23S nucleotide within 4A of 30S r-protein S6 (chain F in 2WDL)
1205	U	rprotein	23S nucleotide within 4A of 30S r-protein S6 (chain F in 2WDL)
449	A	rprotein	23S nucleotide within 4A of 30S r-protein S6 (chain F in 2WDL)
615	G	rprotein	23S nucleotide within 4A of 30S r-protein S6 (chain F in 2WDL)
807	U	rprotein	23S nucleotide within 4A of 30S r-protein S6 (chain F in 2WDL)
441	U	rprotein	23S nucleotide within 4A of 30S r-protein S6 (chain F in 2WDL)
620	G	rprotein	23S nucleotide within 4A of 30S r-protein S6 (chain F in 2WDL)
319	C	rprotein	23S nucleotide within 4A of 30S r-protein S6 (chain F in 2WDL)
341	G	rprotein	23S nucleotide within 4A of 30S r-protein S6 (chain F in 2WDL)
599	G	rprotein	23S nucleotide within 4A of 30S r-protein S6 (chain F in 2WDL)
1247	A	rprotein	23S nucleotide within 4A of 30S r-protein S6 (chain F in 2WDL)
440	G	rprotein	23S nucleotide within 4A of 30S r-protein S6 (chain F in 2WDL)
2299	G	rprotein	23S nucleotide within 4A of 30S r-protein S7 (chain G in 2WDL)
2313	C	rprotein	23S nucleotide within 4A of 30S r-protein S7 (chain G in 2WDL)
2306	C	rprotein	23S nucleotide within 4A of 30S r-protein S7 (chain G in 2WDL)
2305	A	rprotein	23S nucleotide within 4A of 30S r-protein S7 (chain G in 2WDL)
2298	A	rprotein	23S nucleotide within 4A of 30S r-protein S7 (chain G in 2WDL)
2303	G	rprotein	23S nucleotide within 4A of 30S r-protein S7 (chain G in 2WDL)
2311	A	rprotein	23S nucleotide within 4A of 30S r-protein S7 (chain G in 2WDL)
2304	G	rprotein	23S nucleotide within 4A of 30S r-protein S7 (chain G in 2WDL)
2312	U	rprotein	23S nucleotide within 4A of 30S r-protein S7 (chain G in 2WDL)
2308	G	rprotein	23S nucleotide within 4A of 30S r-protein S7 (chain G in 2WDL)
2310	A	rprotein	23S nucleotide within 4A of 30S r-protein S7 (chain G in 2WDL)
2315	G	rprotein	23S nucleotide within 4A of 30S r-protein S7 (chain G in 2WDL)
2302	G	rprotein	23S nucleotide within 4A of 30S r-protein S7 (chain G in 2WDL)
2314	C	rprotein	23S nucleotide within 4A of 30S r-protein S7 (chain G in 2WDL)
2746	U	rprotein	23S nucleotide within 4A of 30S r-protein S8 (chain H in 2WDL)
2658	C	rprotein	23S nucleotide within 4A of 30S r-protein S8 (chain H in 2WDL)
2758	A	rprotein	23S nucleotide within 4A of 30S r-protein S8 (chain H in 2WDL)
2657	A	rprotein	23S nucleotide within 4A of 30S r-protein S8 (chain H in 2WDL)
2745	C	rprotein	23S nucleotide within 4A of 30S r-protein S8 (chain H in 2WDL)
2757	A	rprotein	23S nucleotide within 4A of 30S r-protein S8 (chain H in 2WDL)
2761	G	rprotein	23S nucleotide within 4A of 30S r-protein S8 (chain H in 2WDL)
2666	C	rprotein	23S nucleotide within 4A of 30S r-protein S8 (chain H in 2WDL)
2653	U	rprotein	23S nucleotide within 4A of 30S r-protein S8 (chain H in 2WDL)
2667	C	rprotein	23S nucleotide within 4A of 30S r-protein S8 (chain H in 2WDL)
2744	G	rprotein	23S nucleotide within 4A of 30S r-protein S8 (chain H in 2WDL)
2748	A	rprotein	23S nucleotide within 4A of 30S r-protein S8 (chain H in 2WDL)
2750	A	rprotein	23S nucleotide within 4A of 30S r-protein S8 (chain H in 2WDL)
2747	G	rprotein	23S nucleotide within 4A of 30S r-protein S8 (chain H in 2WDL)
1035	U	rprotein	23S nucleotide within 4A of 30S r-protein S8 (chain H in 2WDL)
2759	G	rprotein	23S nucleotide within 4A of 30S r-protein S8 (chain H in 2WDL)
2749	A	rprotein	23S nucleotide within 4A of 30S r-protein S8 (chain H in 2WDL)
1036	G	rprotein	23S nucleotide within 4A of 30S r-protein S8 (chain H in 2WDL)
2197	U	rprotein	23S nucleotide within 4A of 30S r-protein S9 (chain I in 2WDL)
2094	G	rprotein	23S nucleotide within 4A of 30S r-protein S9 (chain I in 2WDL)
2091	U	rprotein	23S nucleotide within 4A of 30S r-protein S9 (chain I in 2WDL)
2092	U	rprotein	23S nucleotide within 4A of 30S r-protein S9 (chain I in 2WDL)
2199	A	rprotein	23S nucleotide within 4A of 30S r-protein S9 (chain I in 2WDL)
2093	G	rprotein	23S nucleotide within 4A of 30S r-protein S9 (chain I in 2WDL)
2198	A	rprotein	23S nucleotide within 4A of 30S r-protein S9 (chain I in 2WDL)
1131	G	rprotein	23S nucleotide within 4A of 30S r-protein S14 (chain N in 2WDL)
537	C	rprotein	23S nucleotide within 4A of 30S r-protein S14 (chain N in 2WDL)
2515	C	rprotein	23S nucleotide within 4A of 30S r-protein S14 (chain N in 2WDL)
8	A	rprotein	23S nucleotide within 4A of 30S r-protein S14 (chain N in 2WDL)
1006	C	rprotein	23S nucleotide within 4A of 30S r-protein S14 (chain N in 2WDL)
1143	A	rprotein	23S nucleotide within 4A of 30S r-protein S14 (chain N in 2WDL)
2024	G	rprotein	23S nucleotide within 4A of 30S r-protein S14 (chain N in 2WDL)
1132	A	rprotein	23S nucleotide within 4A of 30S r-protein S14 (chain N in 2WDL)
1012	U	rprotein	23S nucleotide within 4A of 30S r-protein S14 (chain N in 2WDL)
1137	G	rprotein	23S nucleotide within 4A of 30S r-protein S14 (chain N in 2WDL)
1005	C	rprotein	23S nucleotide within 4A of 30S r-protein S14 (chain N in 2WDL)
557	U	rprotein	23S nucleotide within 4A of 30S r-protein S14 (chain N in 2WDL)
1138	G	rprotein	23S nucleotide within 4A of 30S r-protein S14 (chain N in 2WDL)
2640	G	rprotein	23S nucleotide within 4A of 30S r-protein S14 (chain N in 2WDL)
1021	A	rprotein	23S nucleotide within 4A of 30S r-protein S14 (chain N in 2WDL)
2768	C	rprotein	23S nucleotide within 4A of 30S r-protein S14 (chain N in 2WDL)
1139	G	rprotein	23S nucleotide within 4A of 30S r-protein S14 (chain N in 2WDL)
558	G	rprotein	23S nucleotide within 4A of 30S r-protein S14 (chain N in 2WDL)
1022	G	rprotein	23S nucleotide within 4A of 30S r-protein S14 (chain N in 2WDL)
1140	C	rprotein	23S nucleotide within 4A of 30S r-protein S14 (chain N in 2WDL)
6	A	rprotein	23S nucleotide within 4A of 30S r-protein S14 (chain N in 2WDL)
528	A	rprotein	23S nucleotide within 4A of 30S r-protein S14 (chain N in 2WDL)
2642	G	rprotein	23S nucleotide within 4A of 30S r-protein S14 (chain N in 2WDL)
2641	G	rprotein	23S nucleotide within 4A of 30S r-protein S14 (chain N in 2WDL)
2639	A	rprotein	23S nucleotide within 4A of 30S r-protein S14 (chain N in 2WDL)
2038	G	rprotein	23S nucleotide within 4A of 30S r-protein S14 (chain N in 2WDL)
2039	C	rprotein	23S nucleotide within 4A of 30S r-protein S14 (chain N in 2WDL)
2780	G	rprotein	23S nucleotide within 4A of 30S r-protein S14 (chain N in 2WDL)
1141	U	rprotein	23S nucleotide within 4A of 30S r-protein S14 (chain N in 2WDL)
529	A	rprotein	23S nucleotide within 4A of 30S r-protein S14 (chain N in 2WDL)
995	C	rprotein	23S nucleotide within 4A of 30S r-protein S14 (chain N in 2WDL)
1007	C	rprotein	23S nucleotide within 4A of 30S r-protein S14 (chain N in 2WDL)
7	G	rprotein	23S nucleotide within 4A of 30S r-protein S14 (chain N in 2WDL)
9	U	rprotein	23S nucleotide within 4A of 30S r-protein S14 (chain N in 2WDL)
1009	A	rprotein	23S nucleotide within 4A of 30S r-protein S14 (chain N in 2WDL)
2514	U	rprotein	23S nucleotide within 4A of 30S r-protein S14 (chain N in 2WDL)
1664	A	rprotein	23S nucleotide within 4A of 30S r-protein S15 (chain O in 2WDL)
2728	U	rprotein	23S nucleotide within 4A of 30S r-protein S15 (chain O in 2WDL)
1951	U	rprotein	23S nucleotide within 4A of 30S r-protein S15 (chain O in 2WDL)
1666	G	rprotein	23S nucleotide within 4A of 30S r-protein S15 (chain O in 2WDL)
1668	A	rprotein	23S nucleotide within 4A of 30S r-protein S15 (chain O in 2WDL)
2726	U	rprotein	23S nucleotide within 4A of 30S r-protein S15 (chain O in 2WDL)
2674	G	rprotein	23S nucleotide within 4A of 30S r-protein S15 (chain O in 2WDL)
2547	U	rprotein	23S nucleotide within 4A of 30S r-protein S15 (chain O in 2WDL)
1996	C	rprotein	23S nucleotide within 4A of 30S r-protein S15 (chain O in 2WDL)
2684	U	rprotein	23S nucleotide within 4A of 30S r-protein S15 (chain O in 2WDL)
2565	A	rprotein	23S nucleotide within 4A of 30S r-protein S15 (chain O in 2WDL)
2566	A	rprotein	23S nucleotide within 4A of 30S r-protein S15 (chain O in 2WDL)
2685	G	rprotein	23S nucleotide within 4A of 30S r-protein S15 (chain O in 2WDL)
2675	A	rprotein	23S nucleotide within 4A of 30S r-protein S15 (chain O in 2WDL)
2562	U	rprotein	23S nucleotide within 4A of 30S r-protein S15 (chain O in 2WDL)
2563	U	rprotein	23S nucleotide within 4A of 30S r-protein S15 (chain O in 2WDL)
2683	C	rprotein	23S nucleotide within 4A of 30S r-protein S15 (chain O in 2WDL)
1665	A	rprotein	23S nucleotide within 4A of 30S r-protein S15 (chain O in 2WDL)
2561	A	rprotein	23S nucleotide within 4A of 30S r-protein S15 (chain O in 2WDL)
2727	G	rprotein	23S nucleotide within 4A of 30S r-protein S15 (chain O in 2WDL)
1952	A	rprotein	23S nucleotide within 4A of 30S r-protein S15 (chain O in 2WDL)
1667	G	rprotein	23S nucleotide within 4A of 30S r-protein S15 (chain O in 2WDL)
1995	U	rprotein	23S nucleotide within 4A of 30S r-protein S15 (chain O in 2WDL)
1669	A	rprotein	23S nucleotide within 4A of 30S r-protein S15 (chain O in 2WDL)
245	G	rprotein	23S nucleotide within 4A of 30S r-protein S16 (chain P in 2WDL)
813	U	rprotein	23S nucleotide within 4A of 30S r-protein S16 (chain P in 2WDL)
252	G	rprotein	23S nucleotide within 4A of 30S r-protein S16 (chain P in 2WDL)
666	G	rprotein	23S nucleotide within 4A of 30S r-protein S16 (chain P in 2WDL)
631	A	rprotein	23S nucleotide within 4A of 30S r-protein S16 (chain P in 2WDL)
621	A	rprotein	23S nucleotide within 4A of 30S r-protein S16 (chain P in 2WDL)
624	C	rprotein	23S nucleotide within 4A of 30S r-protein S16 (chain P in 2WDL)
2412	A	rprotein	23S nucleotide within 4A of 30S r-protein S16 (chain P in 2WDL)
665	C	rprotein	23S nucleotide within 4A of 30S r-protein S16 (chain P in 2WDL)
941	A	rprotein	23S nucleotide within 4A of 30S r-protein S16 (chain P in 2WDL)
1242	A	rprotein	23S nucleotide within 4A of 30S r-protein S16 (chain P in 2WDL)
604	G	rprotein	23S nucleotide within 4A of 30S r-protein S16 (chain P in 2WDL)
670	A	rprotein	23S nucleotide within 4A of 30S r-protein S16 (chain P in 2WDL)
599	G	rprotein	23S nucleotide within 4A of 30S r-protein S16 (chain P in 2WDL)
1247	A	rprotein	23S nucleotide within 4A of 30S r-protein S16 (chain P in 2WDL)
1189	A	rprotein	23S nucleotide within 4A of 30S r-protein S16 (chain P in 2WDL)
636	G	rprotein	23S nucleotide within 4A of 30S r-protein S16 (chain P in 2WDL)
633	A	rprotein	23S nucleotide within 4A of 30S r-protein S16 (chain P in 2WDL)
814	C	rprotein	23S nucleotide within 4A of 30S r-protein S16 (chain P in 2WDL)
2415	G	rprotein	23S nucleotide within 4A of 30S r-protein S16 (chain P in 2WDL)
831	G	rprotein	23S nucleotide within 4A of 30S r-protein S16 (chain P in 2WDL)
671	C	rprotein	23S nucleotide within 4A of 30S r-protein S16 (chain P in 2WDL)
661	C	rprotein	23S nucleotide within 4A of 30S r-protein S16 (chain P in 2WDL)
598	G	rprotein	23S nucleotide within 4A of 30S r-protein S16 (chain P in 2WDL)
587	C	rprotein	23S nucleotide within 4A of 30S r-protein S16 (chain P in 2WDL)
597	U	rprotein	23S nucleotide within 4A of 30S r-protein S16 (chain P in 2WDL)
815	C	rprotein	23S nucleotide within 4A of 30S r-protein S16 (chain P in 2WDL)
411	G	rprotein	23S nucleotide within 4A of 30S r-protein S16 (chain P in 2WDL)
625	G	rprotein	23S nucleotide within 4A of 30S r-protein S16 (chain P in 2WDL)
942	G	rprotein	23S nucleotide within 4A of 30S r-protein S16 (chain P in 2WDL)
2416	C	rprotein	23S nucleotide within 4A of 30S r-protein S16 (chain P in 2WDL)
2392	A	rprotein	23S nucleotide within 4A of 30S r-protein S16 (chain P in 2WDL)
832	G	rprotein	23S nucleotide within 4A of 30S r-protein S16 (chain P in 2WDL)
246	C	rprotein	23S nucleotide within 4A of 30S r-protein S16 (chain P in 2WDL)
811	U	rprotein	23S nucleotide within 4A of 30S r-protein S16 (chain P in 2WDL)
390	A	rprotein	23S nucleotide within 4A of 30S r-protein S16 (chain P in 2WDL)
229	A	rprotein	23S nucleotide within 4A of 30S r-protein S16 (chain P in 2WDL)
637	A	rprotein	23S nucleotide within 4A of 30S r-protein S16 (chain P in 2WDL)
2405	G	rprotein	23S nucleotide within 4A of 30S r-protein S16 (chain P in 2WDL)
812	C	rprotein	23S nucleotide within 4A of 30S r-protein S16 (chain P in 2WDL)
807	U	rprotein	23S nucleotide within 4A of 30S r-protein S16 (chain P in 2WDL)
833	U	rprotein	23S nucleotide within 4A of 30S r-protein S16 (chain P in 2WDL)
805	G	rprotein	23S nucleotide within 4A of 30S r-protein S16 (chain P in 2WDL)
603	A	rprotein	23S nucleotide within 4A of 30S r-protein S16 (chain P in 2WDL)
1246	A	rprotein	23S nucleotide within 4A of 30S r-protein S16 (chain P in 2WDL)
1245	G	rprotein	23S nucleotide within 4A of 30S r-protein S16 (chain P in 2WDL)
2360	A	rprotein	23S nucleotide within 4A of 30S r-protein S16 (chain P in 2WDL)
251	A	rprotein	23S nucleotide within 4A of 30S r-protein S16 (chain P in 2WDL)
1202	C	rprotein	23S nucleotide within 4A of 30S r-protein S16 (chain P in 2WDL)
660	G	rprotein	23S nucleotide within 4A of 30S r-protein S16 (chain P in 2WDL)
1244	G	rprotein	23S nucleotide within 4A of 30S r-protein S16 (chain P in 2WDL)
664	C	rprotein	23S nucleotide within 4A of 30S r-protein S16 (chain P in 2WDL)
2406	U	rprotein	23S nucleotide within 4A of 30S r-protein S16 (chain P in 2WDL)
943	U	rprotein	23S nucleotide within 4A of 30S r-protein S16 (chain P in 2WDL)
1192	G	rprotein	23S nucleotide within 4A of 30S r-protein S16 (chain P in 2WDL)
627	A	rprotein	23S nucleotide within 4A of 30S r-protein S16 (chain P in 2WDL)
662	G	rprotein	23S nucleotide within 4A of 30S r-protein S16 (chain P in 2WDL)
2393	A	rprotein	23S nucleotide within 4A of 30S r-protein S16 (chain P in 2WDL)
2394	C	rprotein	23S nucleotide within 4A of 30S r-protein S16 (chain P in 2WDL)
1193	G	rprotein	23S nucleotide within 4A of 30S r-protein S16 (chain P in 2WDL)
389	G	rprotein	23S nucleotide within 4A of 30S r-protein S16 (chain P in 2WDL)
663	G	rprotein	23S nucleotide within 4A of 30S r-protein S16 (chain P in 2WDL)
2428	G	rprotein	23S nucleotide within 4A of 30S r-protein S16 (chain P in 2WDL)
2359	C	rprotein	23S nucleotide within 4A of 30S r-protein S16 (chain P in 2WDL)
1243	G	rprotein	23S nucleotide within 4A of 30S r-protein S16 (chain P in 2WDL)
810	U	rprotein	23S nucleotide within 4A of 30S r-protein S16 (chain P in 2WDL)
385	C	rprotein	23S nucleotide within 4A of 30S r-protein S16 (chain P in 2WDL)
196	A	rprotein	23S nucleotide within 4A of 30S r-protein S16 (chain P in 2WDL)
2429	G	rprotein	23S nucleotide within 4A of 30S r-protein S16 (chain P in 2WDL)
1191	G	rprotein	23S nucleotide within 4A of 30S r-protein S16 (chain P in 2WDL)
2414	G	rprotein	23S nucleotide within 4A of 30S r-protein S16 (chain P in 2WDL)
2404	C	rprotein	23S nucleotide within 4A of 30S r-protein S16 (chain P in 2WDL)
623	G	rprotein	23S nucleotide within 4A of 30S r-protein S16 (chain P in 2WDL)
626	U	rprotein	23S nucleotide within 4A of 30S r-protein S16 (chain P in 2WDL)
2413	G	rprotein	23S nucleotide within 4A of 30S r-protein S16 (chain P in 2WDL)
1190	G	rprotein	23S nucleotide within 4A of 30S r-protein S16 (chain P in 2WDL)
2417	C	rprotein	23S nucleotide within 4A of 30S r-protein S16 (chain P in 2WDL)
826	U	rprotein	23S nucleotide within 4A of 30S r-protein S16 (chain P in 2WDL)
195	A	rprotein	23S nucleotide within 4A of 30S r-protein S16 (chain P in 2WDL)
622	G	rprotein	23S nucleotide within 4A of 30S r-protein S16 (chain P in 2WDL)
250	G	rprotein	23S nucleotide within 4A of 30S r-protein S16 (chain P in 2WDL)
244	A	rprotein	23S nucleotide within 4A of 30S r-protein S16 (chain P in 2WDL)
940	G	rprotein	23S nucleotide within 4A of 30S r-protein S16 (chain P in 2WDL)
2358	G	rprotein	23S nucleotide within 4A of 30S r-protein S16 (chain P in 2WDL)
806	C	rprotein	23S nucleotide within 4A of 30S r-protein S16 (chain P in 2WDL)
825	C	rprotein	23S nucleotide within 4A of 30S r-protein S16 (chain P in 2WDL)
955	C	rprotein	23S nucleotide within 4A of 30S r-protein S17 (chain Q in 2WDL)
2249	U	rprotein	23S nucleotide within 4A of 30S r-protein S17 (chain Q in 2WDL)
2484	G	rprotein	23S nucleotide within 4A of 30S r-protein S17 (chain Q in 2WDL)
906	G	rprotein	23S nucleotide within 4A of 30S r-protein S17 (chain Q in 2WDL)
2496	C	rprotein	23S nucleotide within 4A of 30S r-protein S17 (chain Q in 2WDL)
1029	A	rprotein	23S nucleotide within 4A of 30S r-protein S17 (chain Q in 2WDL)
2276	G	rprotein	23S nucleotide within 4A of 30S r-protein S17 (chain Q in 2WDL)
2482	G	rprotein	23S nucleotide within 4A of 30S r-protein S17 (chain Q in 2WDL)
869	G	rprotein	23S nucleotide within 4A of 30S r-protein S17 (chain Q in 2WDL)
907	U	rprotein	23S nucleotide within 4A of 30S r-protein S17 (chain Q in 2WDL)
1031	G	rprotein	23S nucleotide within 4A of 30S r-protein S17 (chain Q in 2WDL)
863	A	rprotein	23S nucleotide within 4A of 30S r-protein S17 (chain Q in 2WDL)
953	A	rprotein	23S nucleotide within 4A of 30S r-protein S17 (chain Q in 2WDL)
2494	G	rprotein	23S nucleotide within 4A of 30S r-protein S17 (chain Q in 2WDL)
2493	U	rprotein	23S nucleotide within 4A of 30S r-protein S17 (chain Q in 2WDL)
2275	C	rprotein	23S nucleotide within 4A of 30S r-protein S17 (chain Q in 2WDL)
2278	A	rprotein	23S nucleotide within 4A of 30S r-protein S17 (chain Q in 2WDL)
908	C	rprotein	23S nucleotide within 4A of 30S r-protein S17 (chain Q in 2WDL)
954	G	rprotein	23S nucleotide within 4A of 30S r-protein S17 (chain Q in 2WDL)
2250	G	rprotein	23S nucleotide within 4A of 30S r-protein S17 (chain Q in 2WDL)
959	A	rprotein	23S nucleotide within 4A of 30S r-protein S17 (chain Q in 2WDL)
2483	C	rprotein	23S nucleotide within 4A of 30S r-protein S17 (chain Q in 2WDL)
962	G	rprotein	23S nucleotide within 4A of 30S r-protein S17 (chain Q in 2WDL)
2468	G	rprotein	23S nucleotide within 4A of 30S r-protein S17 (chain Q in 2WDL)
873	G	rprotein	23S nucleotide within 4A of 30S r-protein S17 (chain Q in 2WDL)
2485	G	rprotein	23S nucleotide within 4A of 30S r-protein S17 (chain Q in 2WDL)
2466	C	rprotein	23S nucleotide within 4A of 30S r-protein S17 (chain Q in 2WDL)
2255	G	rprotein	23S nucleotide within 4A of 30S r-protein S17 (chain Q in 2WDL)
868	U	rprotein	23S nucleotide within 4A of 30S r-protein S17 (chain Q in 2WDL)
957	A	rprotein	23S nucleotide within 4A of 30S r-protein S17 (chain Q in 2WDL)
905	U	rprotein	23S nucleotide within 4A of 30S r-protein S17 (chain Q in 2WDL)
2467	C	rprotein	23S nucleotide within 4A of 30S r-protein S17 (chain Q in 2WDL)
2469	A	rprotein	23S nucleotide within 4A of 30S r-protein S17 (chain Q in 2WDL)
2495	G	rprotein	23S nucleotide within 4A of 30S r-protein S17 (chain Q in 2WDL)
956	G	rprotein	23S nucleotide within 4A of 30S r-protein S17 (chain Q in 2WDL)
2277	G	rprotein	23S nucleotide within 4A of 30S r-protein S17 (chain Q in 2WDL)
912	C	rprotein	23S nucleotide within 4A of 30S r-protein S17 (chain Q in 2WDL)
911	A	rprotein	23S nucleotide within 4A of 30S r-protein S17 (chain Q in 2WDL)
2265	U	rprotein	23S nucleotide within 4A of 30S r-protein S17 (chain Q in 2WDL)
864	G	rprotein	23S nucleotide within 4A of 30S r-protein S17 (chain Q in 2WDL)
2460	U	rprotein	23S nucleotide within 4A of 30S r-protein S17 (chain Q in 2WDL)
952	G	rprotein	23S nucleotide within 4A of 30S r-protein S17 (chain Q in 2WDL)
2459	A	rprotein	23S nucleotide within 4A of 30S r-protein S17 (chain Q in 2WDL)
1030	G	rprotein	23S nucleotide within 4A of 30S r-protein S17 (chain Q in 2WDL)
2486	G	rprotein	23S nucleotide within 4A of 30S r-protein S17 (chain Q in 2WDL)
871	U	rprotein	23S nucleotide within 4A of 30S r-protein S17 (chain Q in 2WDL)
2470	G	rprotein	23S nucleotide within 4A of 30S r-protein S17 (chain Q in 2WDL)
874	G	rprotein	23S nucleotide within 4A of 30S r-protein S17 (chain Q in 2WDL)
910	A	rprotein	23S nucleotide within 4A of 30S r-protein S17 (chain Q in 2WDL)
909	A	rprotein	23S nucleotide within 4A of 30S r-protein S17 (chain Q in 2WDL)
870	A	rprotein	23S nucleotide within 4A of 30S r-protein S17 (chain Q in 2WDL)
960	A	rprotein	23S nucleotide within 4A of 30S r-protein S17 (chain Q in 2WDL)
958	U	rprotein	23S nucleotide within 4A of 30S r-protein S17 (chain Q in 2WDL)
2251	G	rprotein	23S nucleotide within 4A of 30S r-protein S17 (chain Q in 2WDL)
2689	U	rprotein	23S nucleotide within 4A of 30S r-protein S18 (chain R in 2WDL)
2880	C	rprotein	23S nucleotide within 4A of 30S r-protein S18 (chain R in 2WDL)
1654	A	rprotein	23S nucleotide within 4A of 30S r-protein S18 (chain R in 2WDL)
2708	G	rprotein	23S nucleotide within 4A of 30S r-protein S18 (chain R in 2WDL)
2705	A	rprotein	23S nucleotide within 4A of 30S r-protein S18 (chain R in 2WDL)
2870	C	rprotein	23S nucleotide within 4A of 30S r-protein S18 (chain R in 2WDL)
1287	A	rprotein	23S nucleotide within 4A of 30S r-protein S18 (chain R in 2WDL)
2817	G	rprotein	23S nucleotide within 4A of 30S r-protein S18 (chain R in 2WDL)
1279	G	rprotein	23S nucleotide within 4A of 30S r-protein S18 (chain R in 2WDL)
1276	A	rprotein	23S nucleotide within 4A of 30S r-protein S18 (chain R in 2WDL)
2690	C	rprotein	23S nucleotide within 4A of 30S r-protein S18 (chain R in 2WDL)
2839	G	rprotein	23S nucleotide within 4A of 30S r-protein S18 (chain R in 2WDL)
2851	A	rprotein	23S nucleotide within 4A of 30S r-protein S18 (chain R in 2WDL)
2713	A	rprotein	23S nucleotide within 4A of 30S r-protein S18 (chain R in 2WDL)
2840	C	rprotein	23S nucleotide within 4A of 30S r-protein S18 (chain R in 2WDL)
1655	A	rprotein	23S nucleotide within 4A of 30S r-protein S18 (chain R in 2WDL)
2822	G	rprotein	23S nucleotide within 4A of 30S r-protein S18 (chain R in 2WDL)
2002	G	rprotein	23S nucleotide within 4A of 30S r-protein S18 (chain R in 2WDL)
2850	A	rprotein	23S nucleotide within 4A of 30S r-protein S18 (chain R in 2WDL)
2882	A	rprotein	23S nucleotide within 4A of 30S r-protein S18 (chain R in 2WDL)
2841	C	rprotein	23S nucleotide within 4A of 30S r-protein S18 (chain R in 2WDL)
2881	C	rprotein	23S nucleotide within 4A of 30S r-protein S18 (chain R in 2WDL)
1286	A	rprotein	23S nucleotide within 4A of 30S r-protein S18 (chain R in 2WDL)
1294	U	rprotein	23S nucleotide within 4A of 30S r-protein S18 (chain R in 2WDL)
2819	G	rprotein	23S nucleotide within 4A of 30S r-protein S18 (chain R in 2WDL)
2009	G	rprotein	23S nucleotide within 4A of 30S r-protein S18 (chain R in 2WDL)
2008	C	rprotein	23S nucleotide within 4A of 30S r-protein S18 (chain R in 2WDL)
2722	G	rprotein	23S nucleotide within 4A of 30S r-protein S18 (chain R in 2WDL)
2820	A	rprotein	23S nucleotide within 4A of 30S r-protein S18 (chain R in 2WDL)
2001	A	rprotein	23S nucleotide within 4A of 30S r-protein S18 (chain R in 2WDL)
2838	G	rprotein	23S nucleotide within 4A of 30S r-protein S18 (chain R in 2WDL)
2707	G	rprotein	23S nucleotide within 4A of 30S r-protein S18 (chain R in 2WDL)
2816	C	rprotein	23S nucleotide within 4A of 30S r-protein S18 (chain R in 2WDL)
1278	A	rprotein	23S nucleotide within 4A of 30S r-protein S18 (chain R in 2WDL)
1455	G	rprotein	23S nucleotide within 4A of 30S r-protein S18 (chain R in 2WDL)
2837	G	rprotein	23S nucleotide within 4A of 30S r-protein S18 (chain R in 2WDL)
2869	G	rprotein	23S nucleotide within 4A of 30S r-protein S18 (chain R in 2WDL)
2871	C	rprotein	23S nucleotide within 4A of 30S r-protein S18 (chain R in 2WDL)
1653	G	rprotein	23S nucleotide within 4A of 30S r-protein S18 (chain R in 2WDL)
1649	G	rprotein	23S nucleotide within 4A of 30S r-protein S18 (chain R in 2WDL)
2821	A	rprotein	23S nucleotide within 4A of 30S r-protein S18 (chain R in 2WDL)
2721	A	rprotein	23S nucleotide within 4A of 30S r-protein S18 (chain R in 2WDL)
2818	G	rprotein	23S nucleotide within 4A of 30S r-protein S18 (chain R in 2WDL)
1295	C	rprotein	23S nucleotide within 4A of 30S r-protein S18 (chain R in 2WDL)
2723	C	rprotein	23S nucleotide within 4A of 30S r-protein S18 (chain R in 2WDL)
1288	U	rprotein	23S nucleotide within 4A of 30S r-protein S18 (chain R in 2WDL)
2852	G	rprotein	23S nucleotide within 4A of 30S r-protein S18 (chain R in 2WDL)
1650	G	rprotein	23S nucleotide within 4A of 30S r-protein S18 (chain R in 2WDL)
2709	G	rprotein	23S nucleotide within 4A of 30S r-protein S18 (chain R in 2WDL)
1285	G	rprotein	23S nucleotide within 4A of 30S r-protein S18 (chain R in 2WDL)
2873	A	rprotein	23S nucleotide within 4A of 30S r-protein S18 (chain R in 2WDL)
1651	G	rprotein	23S nucleotide within 4A of 30S r-protein S18 (chain R in 2WDL)
1453	U	rprotein	23S nucleotide within 4A of 30S r-protein S18 (chain R in 2WDL)
1277	G	rprotein	23S nucleotide within 4A of 30S r-protein S18 (chain R in 2WDL)
2000	G	rprotein	23S nucleotide within 4A of 30S r-protein S18 (chain R in 2WDL)
2706	G	rprotein	23S nucleotide within 4A of 30S r-protein S18 (chain R in 2WDL)
2710	C	rprotein	23S nucleotide within 4A of 30S r-protein S18 (chain R in 2WDL)
1652	A	rprotein	23S nucleotide within 4A of 30S r-protein S18 (chain R in 2WDL)
1452	A	rprotein	23S nucleotide within 4A of 30S r-protein S18 (chain R in 2WDL)
1275	A	rprotein	23S nucleotide within 4A of 30S r-protein S18 (chain R in 2WDL)
2377	A	rprotein	23S nucleotide within 4A of 30S r-protein S19 (chain S in 2WDL)
2293	C	rprotein	23S nucleotide within 4A of 30S r-protein S19 (chain S in 2WDL)
2294	C	rprotein	23S nucleotide within 4A of 30S r-protein S19 (chain S in 2WDL)
2292	C	rprotein	23S nucleotide within 4A of 30S r-protein S19 (chain S in 2WDL)
2376	A	rprotein	23S nucleotide within 4A of 30S r-protein S19 (chain S in 2WDL)
2319	G	rprotein	23S nucleotide within 4A of 30S r-protein S19 (chain S in 2WDL)
2378	A	rprotein	23S nucleotide within 4A of 30S r-protein S19 (chain S in 2WDL)
2333	A	rprotein	23S nucleotide within 4A of 30S r-protein S19 (chain S in 2WDL)
2379	G	rprotein	23S nucleotide within 4A of 30S r-protein S19 (chain S in 2WDL)
2296	U	rprotein	23S nucleotide within 4A of 30S r-protein S19 (chain S in 2WDL)
2334	G	rprotein	23S nucleotide within 4A of 30S r-protein S19 (chain S in 2WDL)
2863	C	rprotein	23S nucleotide within 4A of 30S r-protein S20 (chain T in 2WDL)
2862	G	rprotein	23S nucleotide within 4A of 30S r-protein S20 (chain T in 2WDL)
2847	U	rprotein	23S nucleotide within 4A of 30S r-protein S20 (chain T in 2WDL)
2876	G	rprotein	23S nucleotide within 4A of 30S r-protein S20 (chain T in 2WDL)
2875	C	rprotein	23S nucleotide within 4A of 30S r-protein S20 (chain T in 2WDL)
1753	G	rprotein	23S nucleotide within 4A of 30S r-protein S20 (chain T in 2WDL)
2864	G	rprotein	23S nucleotide within 4A of 30S r-protein S20 (chain T in 2WDL)
1755	A	rprotein	23S nucleotide within 4A of 30S r-protein S20 (chain T in 2WDL)
2865	U	rprotein	23S nucleotide within 4A of 30S r-protein S20 (chain T in 2WDL)
2845	G	rprotein	23S nucleotide within 4A of 30S r-protein S20 (chain T in 2WDL)
2684	U	rprotein	23S nucleotide within 4A of 30S r-protein S20 (chain T in 2WDL)
2718	G	rprotein	23S nucleotide within 4A of 30S r-protein S20 (chain T in 2WDL)
2848	G	rprotein	23S nucleotide within 4A of 30S r-protein S20 (chain T in 2WDL)
2717	G	rprotein	23S nucleotide within 4A of 30S r-protein S20 (chain T in 2WDL)
2844	G	rprotein	23S nucleotide within 4A of 30S r-protein S20 (chain T in 2WDL)
2685	G	rprotein	23S nucleotide within 4A of 30S r-protein S20 (chain T in 2WDL)
2683	C	rprotein	23S nucleotide within 4A of 30S r-protein S20 (chain T in 2WDL)
2849	U	rprotein	23S nucleotide within 4A of 30S r-protein S20 (chain T in 2WDL)
2877	G	rprotein	23S nucleotide within 4A of 30S r-protein S20 (chain T in 2WDL)
2867	G	rprotein	23S nucleotide within 4A of 30S r-protein S20 (chain T in 2WDL)
2719	G	rprotein	23S nucleotide within 4A of 30S r-protein S20 (chain T in 2WDL)
2682	U	rprotein	23S nucleotide within 4A of 30S r-protein S20 (chain T in 2WDL)
2846	G	rprotein	23S nucleotide within 4A of 30S r-protein S20 (chain T in 2WDL)
1754	C	rprotein	23S nucleotide within 4A of 30S r-protein S20 (chain T in 2WDL)
1216	G	rprotein	23S nucleotide within 4A of 30S r-protein THX (chain U in 2WDL)
1200	C	rprotein	23S nucleotide within 4A of 30S r-protein THX (chain U in 2WDL)
997	G	rprotein	23S nucleotide within 4A of 30S r-protein THX (chain U in 2WDL)
554	U	rprotein	23S nucleotide within 4A of 30S r-protein THX (chain U in 2WDL)
993	G	rprotein	23S nucleotide within 4A of 30S r-protein THX (chain U in 2WDL)
18	C	rprotein	23S nucleotide within 4A of 30S r-protein THX (chain U in 2WDL)
536	A	rprotein	23S nucleotide within 4A of 30S r-protein THX (chain U in 2WDL)
443	A	rprotein	23S nucleotide within 4A of 30S r-protein THX (chain U in 2WDL)
1248	G	rprotein	23S nucleotide within 4A of 30S r-protein THX (chain U in 2WDL)
1251	C	rprotein	23S nucleotide within 4A of 30S r-protein THX (chain U in 2WDL)
2019	A	rprotein	23S nucleotide within 4A of 30S r-protein THX (chain U in 2WDL)
580	C	rprotein	23S nucleotide within 4A of 30S r-protein THX (chain U in 2WDL)
533	G	rprotein	23S nucleotide within 4A of 30S r-protein THX (chain U in 2WDL)
1252	G	rprotein	23S nucleotide within 4A of 30S r-protein THX (chain U in 2WDL)
2020	A	rprotein	23S nucleotide within 4A of 30S r-protein THX (chain U in 2WDL)
29	U	rprotein	23S nucleotide within 4A of 30S r-protein THX (chain U in 2WDL)
1227	G	rprotein	23S nucleotide within 4A of 30S r-protein THX (chain U in 2WDL)
1226	A	rprotein	23S nucleotide within 4A of 30S r-protein THX (chain U in 2WDL)
30	G	rprotein	23S nucleotide within 4A of 30S r-protein THX (chain U in 2WDL)
990	A	rprotein	23S nucleotide within 4A of 30S r-protein THX (chain U in 2WDL)
994	C	rprotein	23S nucleotide within 4A of 30S r-protein THX (chain U in 2WDL)
564	C	rprotein	23S nucleotide within 4A of 30S r-protein THX (chain U in 2WDL)
1153	C	rprotein	23S nucleotide within 4A of 30S r-protein THX (chain U in 2WDL)
559	G	rprotein	23S nucleotide within 4A of 30S r-protein THX (chain U in 2WDL)
1199	U	rprotein	23S nucleotide within 4A of 30S r-protein THX (chain U in 2WDL)
17	G	rprotein	23S nucleotide within 4A of 30S r-protein THX (chain U in 2WDL)
1012	U	rprotein	23S nucleotide within 4A of 30S r-protein THX (chain U in 2WDL)
1215	G	rprotein	23S nucleotide within 4A of 30S r-protein THX (chain U in 2WDL)
2021	C	rprotein	23S nucleotide within 4A of 30S r-protein THX (chain U in 2WDL)
1151	G	rprotein	23S nucleotide within 4A of 30S r-protein THX (chain U in 2WDL)
583	G	rprotein	23S nucleotide within 4A of 30S r-protein THX (chain U in 2WDL)
996	A	rprotein	23S nucleotide within 4A of 30S r-protein THX (chain U in 2WDL)
581	C	rprotein	23S nucleotide within 4A of 30S r-protein THX (chain U in 2WDL)
585	G	rprotein	23S nucleotide within 4A of 30S r-protein THX (chain U in 2WDL)
584	C	rprotein	23S nucleotide within 4A of 30S r-protein THX (chain U in 2WDL)
20	C	rprotein	23S nucleotide within 4A of 30S r-protein THX (chain U in 2WDL)
992	C	rprotein	23S nucleotide within 4A of 30S r-protein THX (chain U in 2WDL)
1011	G	rprotein	23S nucleotide within 4A of 30S r-protein THX (chain U in 2WDL)
531	C	rprotein	23S nucleotide within 4A of 30S r-protein THX (chain U in 2WDL)
998	C	rprotein	23S nucleotide within 4A of 30S r-protein THX (chain U in 2WDL)
560	C	rprotein	23S nucleotide within 4A of 30S r-protein THX (chain U in 2WDL)
28	A	rprotein	23S nucleotide within 4A of 30S r-protein THX (chain U in 2WDL)
578	A	rprotein	23S nucleotide within 4A of 30S r-protein THX (chain U in 2WDL)
1154	G	rprotein	23S nucleotide within 4A of 30S r-protein THX (chain U in 2WDL)
1219	G	rprotein	23S nucleotide within 4A of 30S r-protein THX (chain U in 2WDL)
1247	A	rprotein	23S nucleotide within 4A of 30S r-protein THX (chain U in 2WDL)
446	G	rprotein	23S nucleotide within 4A of 30S r-protein THX (chain U in 2WDL)
532	A	rprotein	23S nucleotide within 4A of 30S r-protein THX (chain U in 2WDL)
1010	A	rprotein	23S nucleotide within 4A of 30S r-protein THX (chain U in 2WDL)
445	C	rprotein	23S nucleotide within 4A of 30S r-protein THX (chain U in 2WDL)
561	G	rprotein	23S nucleotide within 4A of 30S r-protein THX (chain U in 2WDL)
582	G	rprotein	23S nucleotide within 4A of 30S r-protein THX (chain U in 2WDL)
1156	A	rprotein	23S nucleotide within 4A of 30S r-protein THX (chain U in 2WDL)
19	C	rprotein	23S nucleotide within 4A of 30S r-protein THX (chain U in 2WDL)
444	C	rprotein	23S nucleotide within 4A of 30S r-protein THX (chain U in 2WDL)
535	C	rprotein	23S nucleotide within 4A of 30S r-protein THX (chain U in 2WDL)
513	A	rprotein	23S nucleotide within 4A of 30S r-protein THX (chain U in 2WDL)
447	A	rprotein	23S nucleotide within 4A of 30S r-protein THX (chain U in 2WDL)
1009	A	rprotein	23S nucleotide within 4A of 30S r-protein THX (chain U in 2WDL)
449	A	rprotein	23S nucleotide within 4A of 30S r-protein THX (chain U in 2WDL)
1155	A	rprotein	23S nucleotide within 4A of 30S r-protein THX (chain U in 2WDL)
1198	U	rprotein	23S nucleotide within 4A of 30S r-protein THX (chain U in 2WDL)
2018	G	rprotein	23S nucleotide within 4A of 30S r-protein THX (chain U in 2WDL)
1152	C	rprotein	23S nucleotide within 4A of 30S r-protein THX (chain U in 2WDL)
534	U	rprotein	23S nucleotide within 4A of 30S r-protein THX (chain U in 2WDL)
995	C	rprotein	23S nucleotide within 4A of 30S r-protein THX (chain U in 2WDL)
563	G	rprotein	23S nucleotide within 4A of 30S r-protein THX (chain U in 2WDL)
1249	U	rprotein	23S nucleotide within 4A of 30S r-protein THX (chain U in 2WDL)
1224	C	rprotein	23S nucleotide within 4A of P-SITE PHE-TRNA PHE (chain V in 2WDL)
1225	G	rprotein	23S nucleotide within 4A of P-SITE PHE-TRNA PHE (chain V in 2WDL)
993	G	rprotein	23S nucleotide within 4A of P-SITE PHE-TRNA PHE (chain V in 2WDL)
996	A	rprotein	23S nucleotide within 4A of P-SITE PHE-TRNA PHE (chain V in 2WDL)
814	C	rprotein	23S nucleotide within 4A of P-SITE PHE-TRNA PHE (chain V in 2WDL)
974	G	rprotein	23S nucleotide within 4A of P-SITE PHE-TRNA PHE (chain V in 2WDL)
1186	G	rprotein	23S nucleotide within 4A of P-SITE PHE-TRNA PHE (chain V in 2WDL)
1226	A	rprotein	23S nucleotide within 4A of P-SITE PHE-TRNA PHE (chain V in 2WDL)
992	C	rprotein	23S nucleotide within 4A of P-SITE PHE-TRNA PHE (chain V in 2WDL)
994	C	rprotein	23S nucleotide within 4A of P-SITE PHE-TRNA PHE (chain V in 2WDL)
564	C	rprotein	23S nucleotide within 4A of P-SITE PHE-TRNA PHE (chain V in 2WDL)
1160	G	rprotein	23S nucleotide within 4A of P-SITE PHE-TRNA PHE (chain V in 2WDL)
567	A	rprotein	23S nucleotide within 4A of P-SITE PHE-TRNA PHE (chain V in 2WDL)
815	C	rprotein	23S nucleotide within 4A of P-SITE PHE-TRNA PHE (chain V in 2WDL)
990	A	rprotein	23S nucleotide within 4A of P-SITE PHE-TRNA PHE (chain V in 2WDL)
1161	C	rprotein	23S nucleotide within 4A of P-SITE PHE-TRNA PHE (chain V in 2WDL)
565	C	rprotein	23S nucleotide within 4A of P-SITE PHE-TRNA PHE (chain V in 2WDL)
1162	G	rprotein	23S nucleotide within 4A of P-SITE PHE-TRNA PHE (chain V in 2WDL)
1221	C	rprotein	23S nucleotide within 4A of P-SITE PHE-TRNA PHE (chain V in 2WDL)
573	G	rprotein	23S nucleotide within 4A of P-SITE PHE-TRNA PHE (chain V in 2WDL)
566	U	rprotein	23S nucleotide within 4A of P-SITE PHE-TRNA PHE (chain V in 2WDL)
1223	G	rprotein	23S nucleotide within 4A of P-SITE PHE-TRNA PHE (chain V in 2WDL)
572	A	rprotein	23S nucleotide within 4A of P-SITE PHE-TRNA PHE (chain V in 2WDL)
1188	U	rprotein	23S nucleotide within 4A of P-SITE PHE-TRNA PHE (chain V in 2WDL)
1222	C	rprotein	23S nucleotide within 4A of P-SITE PHE-TRNA PHE (chain V in 2WDL)
1163	G	rprotein	23S nucleotide within 4A of P-SITE PHE-TRNA PHE (chain V in 2WDL)
571	A	rprotein	23S nucleotide within 4A of P-SITE PHE-TRNA PHE (chain V in 2WDL)
1187	G	rprotein	23S nucleotide within 4A of P-SITE PHE-TRNA PHE (chain V in 2WDL)
479	A	rprotein	23S nucleotide within 4A of A-SITE PHE-TRNA PHE (chain Y in 2WDL)
328	U	rprotein	23S nucleotide within 4A of A-SITE PHE-TRNA PHE (chain Y in 2WDL)
89	G	rprotein	23S nucleotide within 4A of A-SITE PHE-TRNA PHE (chain Y in 2WDL)
300	A	rprotein	23S nucleotide within 4A of A-SITE PHE-TRNA PHE (chain Y in 2WDL)
310	A	rprotein	23S nucleotide within 4A of A-SITE PHE-TRNA PHE (chain Y in 2WDL)
299	A	rprotein	23S nucleotide within 4A of A-SITE PHE-TRNA PHE (chain Y in 2WDL)
309	G	rprotein	23S nucleotide within 4A of A-SITE PHE-TRNA PHE (chain Y in 2WDL)
297	C	rprotein	23S nucleotide within 4A of A-SITE PHE-TRNA PHE (chain Y in 2WDL)
484	C	rprotein	23S nucleotide within 4A of A-SITE PHE-TRNA PHE (chain Y in 2WDL)
501	A	rprotein	23S nucleotide within 4A of A-SITE PHE-TRNA PHE (chain Y in 2WDL)
335	C	rprotein	23S nucleotide within 4A of A-SITE PHE-TRNA PHE (chain Y in 2WDL)
86	C	rprotein	23S nucleotide within 4A of A-SITE PHE-TRNA PHE (chain Y in 2WDL)
295	G	rprotein	23S nucleotide within 4A of A-SITE PHE-TRNA PHE (chain Y in 2WDL)
106	C	rprotein	23S nucleotide within 4A of A-SITE PHE-TRNA PHE (chain Y in 2WDL)
298	G	rprotein	23S nucleotide within 4A of A-SITE PHE-TRNA PHE (chain Y in 2WDL)
480	A	rprotein	23S nucleotide within 4A of A-SITE PHE-TRNA PHE (chain Y in 2WDL)
85	G	rprotein	23S nucleotide within 4A of A-SITE PHE-TRNA PHE (chain Y in 2WDL)
478	A	rprotein	23S nucleotide within 4A of A-SITE PHE-TRNA PHE (chain Y in 2WDL)
102	G	rprotein	23S nucleotide within 4A of A-SITE PHE-TRNA PHE (chain Y in 2WDL)
336	C	rprotein	23S nucleotide within 4A of A-SITE PHE-TRNA PHE (chain Y in 2WDL)
483	A	rprotein	23S nucleotide within 4A of A-SITE PHE-TRNA PHE (chain Y in 2WDL)
81	G	rprotein	23S nucleotide within 4A of A-SITE PHE-TRNA PHE (chain Y in 2WDL)
104	U	rprotein	23S nucleotide within 4A of A-SITE PHE-TRNA PHE (chain Y in 2WDL)
301	G	rprotein	23S nucleotide within 4A of A-SITE PHE-TRNA PHE (chain Y in 2WDL)
481	G	rprotein	23S nucleotide within 4A of A-SITE PHE-TRNA PHE (chain Y in 2WDL)
499	U	rprotein	23S nucleotide within 4A of A-SITE PHE-TRNA PHE (chain Y in 2WDL)
84	A	rprotein	23S nucleotide within 4A of A-SITE PHE-TRNA PHE (chain Y in 2WDL)
477	A	rprotein	23S nucleotide within 4A of A-SITE PHE-TRNA PHE (chain Y in 2WDL)
294	A	rprotein	23S nucleotide within 4A of A-SITE PHE-TRNA PHE (chain Y in 2WDL)
329	G	rprotein	23S nucleotide within 4A of A-SITE PHE-TRNA PHE (chain Y in 2WDL)
308	G	rprotein	23S nucleotide within 4A of A-SITE PHE-TRNA PHE (chain Y in 2WDL)
105	C	rprotein	23S nucleotide within 4A of A-SITE PHE-TRNA PHE (chain Y in 2WDL)
99	U	rprotein	23S nucleotide within 4A of A-SITE PHE-TRNA PHE (chain Y in 2WDL)
327	G	rprotein	23S nucleotide within 4A of A-SITE PHE-TRNA PHE (chain Y in 2WDL)
87	C	rprotein	23S nucleotide within 4A of A-SITE PHE-TRNA PHE (chain Y in 2WDL)
302	C	rprotein	23S nucleotide within 4A of A-SITE PHE-TRNA PHE (chain Y in 2WDL)
1322	A	rprotein	23S nucleotide within 4A of E-SITE TRNA PHE (chain W in 2WDL)
2013	A	rprotein	23S nucleotide within 4A of E-SITE TRNA PHE (chain W in 2WDL)
494	G	rprotein	23S nucleotide within 4A of E-SITE TRNA PHE (chain W in 2WDL)
23	G	rprotein	23S nucleotide within 4A of E-SITE TRNA PHE (chain W in 2WDL)
517	C	rprotein	23S nucleotide within 4A of E-SITE TRNA PHE (chain W in 2WDL)
746	A	rprotein	23S nucleotide within 4A of E-SITE TRNA PHE (chain W in 2WDL)
1266	G	rprotein	23S nucleotide within 4A of E-SITE TRNA PHE (chain W in 2WDL)
2014	A	rprotein	23S nucleotide within 4A of E-SITE TRNA PHE (chain W in 2WDL)
519	U	rprotein	23S nucleotide within 4A of E-SITE TRNA PHE (chain W in 2WDL)
1614	A	rprotein	23S nucleotide within 4A of E-SITE TRNA PHE (chain W in 2WDL)
489	G	rprotein	23S nucleotide within 4A of E-SITE TRNA PHE (chain W in 2WDL)
2613	U	rprotein	23S nucleotide within 4A of E-SITE TRNA PHE (chain W in 2WDL)
491	G	rprotein	23S nucleotide within 4A of E-SITE TRNA PHE (chain W in 2WDL)
26	G	rprotein	23S nucleotide within 4A of E-SITE TRNA PHE (chain W in 2WDL)
495	G	rprotein	23S nucleotide within 4A of E-SITE TRNA PHE (chain W in 2WDL)
2009	G	rprotein	23S nucleotide within 4A of E-SITE TRNA PHE (chain W in 2WDL)
1265	A	rprotein	23S nucleotide within 4A of E-SITE TRNA PHE (chain W in 2WDL)
2011	U	rprotein	23S nucleotide within 4A of E-SITE TRNA PHE (chain W in 2WDL)
488	G	rprotein	23S nucleotide within 4A of E-SITE TRNA PHE (chain W in 2WDL)
1261	C	rprotein	23S nucleotide within 4A of E-SITE TRNA PHE (chain W in 2WDL)
2010	G	rprotein	23S nucleotide within 4A of E-SITE TRNA PHE (chain W in 2WDL)
493	G	rprotein	23S nucleotide within 4A of E-SITE TRNA PHE (chain W in 2WDL)
518	G	rprotein	23S nucleotide within 4A of E-SITE TRNA PHE (chain W in 2WDL)
2012	G	rprotein	23S nucleotide within 4A of E-SITE TRNA PHE (chain W in 2WDL)
24	G	rprotein	23S nucleotide within 4A of E-SITE TRNA PHE (chain W in 2WDL)
487	C	rprotein	23S nucleotide within 4A of E-SITE TRNA PHE (chain W in 2WDL)
496	G	rprotein	23S nucleotide within 4A of E-SITE TRNA PHE (chain W in 2WDL)
1323	U	rprotein	23S nucleotide within 4A of E-SITE TRNA PHE (chain W in 2WDL)
747	U	rprotein	23S nucleotide within 4A of E-SITE TRNA PHE (chain W in 2WDL)
1262	A	rprotein	23S nucleotide within 4A of E-SITE TRNA PHE (chain W in 2WDL)
1325	G	rprotein	23S nucleotide within 4A of E-SITE TRNA PHE (chain W in 2WDL)
751	A	rprotein	23S nucleotide within 4A of E-SITE TRNA PHE (chain W in 2WDL)
486	C	rprotein	23S nucleotide within 4A of E-SITE TRNA PHE (chain W in 2WDL)
748	G	rprotein	23S nucleotide within 4A of E-SITE TRNA PHE (chain W in 2WDL)
2015	A	rprotein	23S nucleotide within 4A of E-SITE TRNA PHE (chain W in 2WDL)
1615	C	rprotein	23S nucleotide within 4A of E-SITE TRNA PHE (chain W in 2WDL)
25	U	rprotein	23S nucleotide within 4A of E-SITE TRNA PHE (chain W in 2WDL)
520	G	rprotein	23S nucleotide within 4A of E-SITE TRNA PHE (chain W in 2WDL)
1597	A	rprotein	23S nucleotide within 4A of MRNA (chain X in 2WDL)
1399	C	rprotein	23S nucleotide within 4A of MRNA (chain X in 2WDL)
1394	U	rprotein	23S nucleotide within 4A of MRNA (chain X in 2WDL)
1341	U	rprotein	23S nucleotide within 4A of MRNA (chain X in 2WDL)
140	G	rprotein	23S nucleotide within 4A of MRNA (chain X in 2WDL)
143	G	rprotein	23S nucleotide within 4A of MRNA (chain X in 2WDL)
1337	G	rprotein	23S nucleotide within 4A of MRNA (chain X in 2WDL)
1398	C	rprotein	23S nucleotide within 4A of MRNA (chain X in 2WDL)
1600	C	rprotein	23S nucleotide within 4A of MRNA (chain X in 2WDL)
1392	A	rprotein	23S nucleotide within 4A of MRNA (chain X in 2WDL)
456	C	rprotein	23S nucleotide within 4A of MRNA (chain X in 2WDL)
63	U	rprotein	23S nucleotide within 4A of MRNA (chain X in 2WDL)
1599	C	rprotein	23S nucleotide within 4A of MRNA (chain X in 2WDL)
58	G	rprotein	23S nucleotide within 4A of MRNA (chain X in 2WDL)
1311	G	rprotein	23S nucleotide within 4A of MRNA (chain X in 2WDL)
1335	U	rprotein	23S nucleotide within 4A of MRNA (chain X in 2WDL)
1338	G	rprotein	23S nucleotide within 4A of MRNA (chain X in 2WDL)
471	A	rprotein	23S nucleotide within 4A of MRNA (chain X in 2WDL)
1343	G	rprotein	23S nucleotide within 4A of MRNA (chain X in 2WDL)
65	C	rprotein	23S nucleotide within 4A of MRNA (chain X in 2WDL)
1336	A	rprotein	23S nucleotide within 4A of MRNA (chain X in 2WDL)
1598	C	rprotein	23S nucleotide within 4A of MRNA (chain X in 2WDL)
128	C	rprotein	23S nucleotide within 4A of MRNA (chain X in 2WDL)
1601	G	rprotein	23S nucleotide within 4A of MRNA (chain X in 2WDL)
139	G	rprotein	23S nucleotide within 4A of MRNA (chain X in 2WDL)
1334	G	rprotein	23S nucleotide within 4A of MRNA (chain X in 2WDL)
71	A	rprotein	23S nucleotide within 4A of MRNA (chain X in 2WDL)
1339	G	rprotein	23S nucleotide within 4A of MRNA (chain X in 2WDL)
1340	U	rprotein	23S nucleotide within 4A of MRNA (chain X in 2WDL)
457	A	rprotein	23S nucleotide within 4A of MRNA (chain X in 2WDL)
64	A	rprotein	23S nucleotide within 4A of MRNA (chain X in 2WDL)
1312	U	rprotein	23S nucleotide within 4A of MRNA (chain X in 2WDL)
1342	A	rprotein	23S nucleotide within 4A of MRNA (chain X in 2WDL)
59	U	rprotein	23S nucleotide within 4A of MRNA (chain X in 2WDL)
2252	G	trna	23S nucleotide within 4A of A-site tRNA (chain V in 2WDK)
2061	G	trna	23S nucleotide within 4A of A-site tRNA (chain V in 2WDK)
1922	G	trna	23S nucleotide within 4A of A-site tRNA (chain V in 2WDK)
1923	U	trna	23S nucleotide within 4A of A-site tRNA (chain V in 2WDK)
2451	A	trna	23S nucleotide within 4A of A-site tRNA (chain V in 2WDK)
1924	C	trna	23S nucleotide within 4A of A-site tRNA (chain V in 2WDK)
1907	G	trna	23S nucleotide within 4A of A-site tRNA (chain V in 2WDK)
2439	A	trna	23S nucleotide within 4A of A-site tRNA (chain V in 2WDK)
2585	U	trna	23S nucleotide within 4A of A-site tRNA (chain V in 2WDK)
2280	G	trna	23S nucleotide within 4A of A-site tRNA (chain V in 2WDK)
2063	C	trna	23S nucleotide within 4A of A-site tRNA (chain V in 2WDK)
2255	G	trna	23S nucleotide within 4A of A-site tRNA (chain V in 2WDK)
2450	A	trna	23S nucleotide within 4A of A-site tRNA (chain V in 2WDK)
2602	A	trna	23S nucleotide within 4A of A-site tRNA (chain V in 2WDK)
2279	G	trna	23S nucleotide within 4A of A-site tRNA (chain V in 2WDK)
2064	C	trna	23S nucleotide within 4A of A-site tRNA (chain V in 2WDK)
2253	G	trna	23S nucleotide within 4A of A-site tRNA (chain V in 2WDK)
1908	C	trna	23S nucleotide within 4A of A-site tRNA (chain V in 2WDK)
2062	A	trna	23S nucleotide within 4A of A-site tRNA (chain V in 2WDK)
1909	C	trna	23S nucleotide within 4A of A-site tRNA (chain V in 2WDK)
2601	C	trna	23S nucleotide within 4A of A-site tRNA (chain V in 2WDK)
2251	G	trna	23S nucleotide within 4A of A-site tRNA (chain V in 2WDK)
881	G	trna	23S nucleotide within 4A of P-site tRNA (chain Y in 2WDK)
2506	U	trna	23S nucleotide within 4A of P-site tRNA (chain Y in 2WDK)
2482	G	trna	23S nucleotide within 4A of P-site tRNA (chain Y in 2WDK)
2555	U	trna	23S nucleotide within 4A of P-site tRNA (chain Y in 2WDK)
897	C	trna	23S nucleotide within 4A of P-site tRNA (chain Y in 2WDK)
2483	C	trna	23S nucleotide within 4A of P-site tRNA (chain Y in 2WDK)
1942	C	trna	23S nucleotide within 4A of P-site tRNA (chain Y in 2WDK)
1943	U	trna	23S nucleotide within 4A of P-site tRNA (chain Y in 2WDK)
2451	A	trna	23S nucleotide within 4A of P-site tRNA (chain Y in 2WDK)
2602	A	trna	23S nucleotide within 4A of P-site tRNA (chain Y in 2WDK)
2584	U	trna	23S nucleotide within 4A of P-site tRNA (chain Y in 2WDK)
2507	C	trna	23S nucleotide within 4A of P-site tRNA (chain Y in 2WDK)
1916	A	trna	23S nucleotide within 4A of P-site tRNA (chain Y in 2WDK)
898	C	trna	23S nucleotide within 4A of P-site tRNA (chain Y in 2WDK)
1913	A	trna	23S nucleotide within 4A of P-site tRNA (chain Y in 2WDK)
896	A	trna	23S nucleotide within 4A of P-site tRNA (chain Y in 2WDK)
2585	U	trna	23S nucleotide within 4A of P-site tRNA (chain Y in 2WDK)
882	G	trna	23S nucleotide within 4A of P-site tRNA (chain Y in 2WDK)
2553	G	trna	23S nucleotide within 4A of P-site tRNA (chain Y in 2WDK)
2583	G	trna	23S nucleotide within 4A of P-site tRNA (chain Y in 2WDK)
2573	C	trna	23S nucleotide within 4A of P-site tRNA (chain Y in 2WDK)
2452	C	trna	23S nucleotide within 4A of P-site tRNA (chain Y in 2WDK)
895	U	trna	23S nucleotide within 4A of P-site tRNA (chain Y in 2WDK)
2554	U	trna	23S nucleotide within 4A of P-site tRNA (chain Y in 2WDK)
2432	A	trna	23S nucleotide within 4A of E-site tRNA (chain W in 2WDK)
2393	A	trna	23S nucleotide within 4A of E-site tRNA (chain W in 2WDK)
1851	U	trna	23S nucleotide within 4A of E-site tRNA (chain W in 2WDK)
2394	C	trna	23S nucleotide within 4A of E-site tRNA (chain W in 2WDK)
2421	G	trna	23S nucleotide within 4A of E-site tRNA (chain W in 2WDK)
2169	A	trna	23S nucleotide within 4A of E-site tRNA (chain W in 2WDK)
2395	C	trna	23S nucleotide within 4A of E-site tRNA (chain W in 2WDK)
2181	G	trna	23S nucleotide within 4A of E-site tRNA (chain W in 2WDK)
2422	A	trna	23S nucleotide within 4A of E-site tRNA (chain W in 2WDK)
2112	G	trna	23S nucleotide within 4A of E-site tRNA (chain W in 2WDK)
2180	U	trna	23S nucleotide within 4A of E-site tRNA (chain W in 2WDK)
1852	C	trna	23S nucleotide within 4A of E-site tRNA (chain W in 2WDK)

## Sheet: References
References
1	Beringer M, Rodnina MV. The ribosomal peptidyl transferase. Mol Cell. 2007;26(3):311-21.
2	Cannone JJ, Subramanian S, Schnare MN, Collett JR, D'Souza LM, Du Y, et al. The comparative RNA web (CRW) site: an online database of comparative sequence and structure information for ribosomal, intron, and other RNAs. BMC Bioinformatics. 2002;3:2.
3	The RNA Modification Database, http://mods.rna.albany.edu/home
4	Wilson DN. Ribosome-targeting antibiotics and mechanisms of bacterial resistance. Nat Rev Microbiol. 2014;12(1):35-48.
5	Liu Q, Fredrick K. Intersubunit Bridges of the Bacterial Ribosome. J Mol Biol. 2016;428(10 Pt B):2146-64.
